# Supplementary material for: Immigrant screening for latent tuberculosis infection: numbers needed to test and treat, a Norwegian population-based cohort study
Source: PubMed Central journal article supplement — BMJ Open. 2019 Jan 17;9(1):e023412. doi: 10.1136/bmjopen-2018-023412 (PMC6340421; doi:10.1136/bmjopen-2018-023412), 2019-01-17
Supplement: bmjopen-2018-023412.draft_revisions.pdf [file bmjopen-2018-023412.draft_revisions.pdf]

# BMJ Open

BMJ Open is committed to open peer review. As part of this commitment we make the peer review history of every article we publish publicly available.

When an article is published we post the peer reviewers' comments and the authors' responses online. We also post the versions of the paper that were used during peer review. These are the versions that the peer review comments apply to.

The versions of the paper that follow are the versions that were submitted during the peer review process. They are not the versions of record or the final published versions. They should not be cited or distributed as the published version of this manuscript.

BMJ Open is an open access journal and the full, final, typeset and author-corrected version of record of the manuscript is available on our site with no access controls, subscription charges or pay-per-view fees (<http://bmjopen.bmj.com>).

If you have any questions on BMJ Open's open peer review process please email [info.bmjopen@bmj.com](mailto:info.bmjopen@bmj.com)

# BMJ Open

## Immigrant screening for latent tuberculosis infection – numbers needed to test and treat: A Norwegian population-based study

|                               |                                                                                                                                                                                                                                                                                                                                                                                                                                                                                                                                                                                                                                                                                      |
|-------------------------------|--------------------------------------------------------------------------------------------------------------------------------------------------------------------------------------------------------------------------------------------------------------------------------------------------------------------------------------------------------------------------------------------------------------------------------------------------------------------------------------------------------------------------------------------------------------------------------------------------------------------------------------------------------------------------------------|
| Journal:                      | <i>BMJ Open</i>                                                                                                                                                                                                                                                                                                                                                                                                                                                                                                                                                                                                                                                                      |
| Manuscript ID                 | bmjopen-2018-023412                                                                                                                                                                                                                                                                                                                                                                                                                                                                                                                                                                                                                                                                  |
| Article Type:                 | Research                                                                                                                                                                                                                                                                                                                                                                                                                                                                                                                                                                                                                                                                             |
| Date Submitted by the Author: | 07-Apr-2018                                                                                                                                                                                                                                                                                                                                                                                                                                                                                                                                                                                                                                                                          |
| Complete List of Authors:     | Winje, Brita; Norwegian Institute of Public Health, Department of vaccine preventable diseases<br>Groneng, Gry ; Norwegian Institute of Public Health, Department of Infectious Disease Epidemiology and Modelling<br>White, Richard; Norwegian Institute of Public Health, Department of Infectious Disease Epidemiology and Modelling<br>Akre, Peter ; Norwegian Directorate of Immigration, Statistics and Analysis Division<br>Aavitsland, Preben; Norwegian Institute of Public Health; University of Oslo, Institute of Health and Society<br>Heldal, Einar; Norwegian Institute of Public Health, Department of Tuberculosis, Blood-Borne and Sexually Transmitted Infections |
| Keywords:                     | Tuberculosis < INFECTIOUS DISEASES, Latent tuberculosis infection, Screening, Number needed to treat, Preventive treatment                                                                                                                                                                                                                                                                                                                                                                                                                                                                                                                                                           |
|                               |                                                                                                                                                                                                                                                                                                                                                                                                                                                                                                                                                                                                                                                                                      |

SCHOLARONE™  
Manuscripts

Only

## Immigrant screening for latent tuberculosis infection – numbers needed to test and treat: A Norwegian population-based study

\***Brita Askeland Winje**, Department of Vaccine-Preventable Diseases, Norwegian Institute of Public Health, Oslo, Norway. E-mail: [brita.winje@fhi.no](mailto:brita.winje@fhi.no)

**Gry Marysol Grøneng**, Department of Infectious Disease Epidemiology and Modelling, Norwegian Institute of Public Health, Oslo, Norway. E-mail: [GryMarysol.Groneng@fhi.no](mailto:GryMarysol.Groneng@fhi.no)

**Richard White** Department of Infectious Disease Epidemiology and Modelling, Norwegian Institute of Public Health, Oslo, Norway. E-mail: [Richard.White@fhi.no](mailto:Richard.White@fhi.no)

**Peter Akre**, Statistics and Analysis Division, Norwegian Directorate of Immigration, Oslo, Norway. E-mail: [paj@udi.no](mailto:paj@udi.no)

**Preben Aavitsland**, Norwegian Institute of Public Health, Oslo, and Institute of Health and Society, University of Oslo, Norway. E-mail: [preben.aavitsland@fhi.no](mailto:preben.aavitsland@fhi.no)

**Einar Heldal**, Department of Tuberculosis, Blood-Borne and Sexually Transmitted Infections, Norwegian Institute of Public Health, Oslo, Norway. E-mail: [einari.heldal@fhi.no](mailto:einari.heldal@fhi.no)

\*Corresponding author

Word count: 3730 words

Key words: tuberculosis, latent tuberculosis infection, screening, preventive treatment, number needed to test, number needed to treat

## ABSTRACT

**Objectives** Explore the effectiveness of the Norwegian immigrant LTBI screening programme by estimating numbers needed to screen (NNS) and treat (NNT) to prevent one tuberculosis (TB) case, and measure the effect of timely follow-up of screening results.

**Design** Population-based prospective study

**Participants** Immigrants to Norway

**Outcome** Incident TB

**Methods** We obtained aggregated data on immigration to Norway in 2008-2011 and used data from the Norwegian Surveillance System for Infectious Diseases to assess the number of TB cases arising in this cohort within 5 years after arrival. We calculated average NNSs and NNTs for immigrants from the top 10 source countries for TB in Norway and by estimated TB incidence rates (IRs) in source countries. We explored the sensitivity of these estimates regarding test sensitivity, treatment efficacy, and treatment adherence using an extreme value approach, and assessed the effects of emigration, time to TB diagnosis (to define incident TB), and intervention timing.

### Results

NNSs and NNTs were overall high, with substantial variation. The NNT showed numerically stronger negative correlation with the TB notification rate in Norway [-0.75 (95% CI -1.05 to -0.44)] than with the World Health Organisation IR [-0.32 (95% CI -0.93 to 0.29)]. NNTs were affected substantially by emigration and the definition of incident TB. Estimates were lowest for Somali [NNS 99 (70-150), NNT 27 (19-41)] and highest for Thai immigrants [NNS 585 (413-887), NNT 111 (79-116)]. Implementing LTBI treatment in immigrants sooner after arrival may improve the effectiveness of the programme.

### Conclusions

Using TB notifications in Norway, rather than IR in source countries, would improve targeting of immigrants for LTBI management. However, the overall high NNT is a concern and challenges the scale-up of preventive LTBI treatment for significant public-health impact. Better data are urgently needed to monitor and evaluate NNS and NNT in countries implementing LTBI screening.

### Strengths and limitations of this study

- We were able to demonstrate the effect of timing of interventions, as we had information on time in Norway prior to tuberculosis (TB) diagnosis or latent tuberculosis infection (LTBI) treatment.
- We could assess the effect of emigration on our estimates because aggregated national migration data at the country level were available.
- The screening coverage in Norway is high among asylum seekers and refugees, but less known in other groups.
- The currently weak monitoring and evaluation systems of the LTBI screening programme limit access to individual data to provide information on yield and programme effectiveness.
- From register data, we could not clearly disentangle those who were ill on arrival (co-prevalent TB) from cases that were potentially preventable through LTBI management (incident TB).

## BACKGROUND

The World Health Organisation (WHO) have issued guidelines for the programmatic management of latent tuberculosis infection (LTBI).<sup>1,2</sup> The guidelines strongly recommend screening for and treatment of LTBI in groups at high-risk groups for tuberculosis (TB) and conditionally in recent immigrants from high- to low TB incidence countries.<sup>1,2</sup> LTBI is common and the risk of progression to TB varies substantially among individuals, assumed to reflect age, time since infection, and host immune status.<sup>1</sup>

The identification of target immigrant groups for LTBI management remains challenging in most low-TB incidence settings. There has been a call for the harmonisation of migrant screening policies across Europe.<sup>3</sup> Eligibility for screening is commonly based on the TB IR in the country of origin or the reason for immigration, with typical focus on asylum seekers and refugees.<sup>3</sup> It has, however, been suggested that the targeting of immigrants based on the TB IR in the host country may improve the effectiveness of immigrant screening programmes.<sup>4</sup>

In Norway, foreign-born individuals account for almost 90% of TB notifications and the majority are diagnosed in the first 5 years after arrival.<sup>5</sup> Based on molecular surveillance of *Mycobacterium tuberculosis* strains, the majority of TB in the foreign-born population is assumed to reflect reactivation of LTBI acquired prior to arrival.<sup>5</sup> Against this backdrop, Norway has a well-established immigrant screening programme for TB and LTBI. Immigrants are currently targeted for TB screening based on the WHO-estimated TB incidence rates (IRs) in their countries of birth.<sup>6</sup> Immigrants younger than 35 years are also targeted for LTBI management to prevent future development of TB. The eligibility for arrival LTBI screening has differed over time; in March 2017 the IR cut-off value was changed from >40/100,000 to >200/100,000 (including immigrants from Afghanistan and Eritrea).<sup>7</sup> The monitoring and evaluation system of the long-standing TB and LTBI screening programme is weak.

The objective of this study was to use Norwegian immigration and TB surveillance data to measure the effectiveness of the immigrant LTBI screening programme, using estimates of the number needed to screen (NNS) and number needed to treat (NNT) for different immigrant screening strategies. We also assessed the impact of LTBI treatments in a 4-year cohort of immigrants to Norway, and measured the effect of timely follow-up of screening results.

## METHODS

### Data and sources

Administrative data on the number of immigrants by year, country of origin, and reason for immigration were obtained from the Norwegian Directorate of Immigration for newly arrived asylum seekers and from Statistics Norway for other immigrant groups. Country of origin reflected citizenship for asylum seekers and country of birth for other immigrant groups.

As later emigration from Norway is substantial in some immigrant groups, we obtained administrative data on individuals' time in Norway before emigration. For refugees and asylum seekers, these data were based on a percentile distribution of the number of days before final application rejection (by country); for other immigrant groups, it was based on aggregated data on the average time in Norway before emigration (by reason for immigration).

We used the WHO Global TB Report 2014 estimates of TB IR in countries of origin in 2013.<sup>6</sup> Demographic and clinical information about individuals with TB and LTBI treatment was obtained from the Norwegian Surveillance System for Infectious Diseases (MSIS). It is mandatory for laboratories and clinicians to report TB diagnosis and treatment, and prescription of LTBI treatment, to MSIS. Untreated LTBI is not reported. The sensitivity of MSIS data is assumed to be high because

1  
2  
3 notifications are sent from multiple sources and are checked routinely against TB drug prescriptions.  
4 On the MSIS notification form, clinicians report time in Norway prior to diagnosis for foreign-born  
5 individuals using the following categories: <1 month, 1-6 months, 7-12 months, 1-2 years, 3-4 years,  
6 5-9 years, and  $\geq 10$  years.

7 We used all TB notifications to MSIS in 2008-2015 (year of reporting) to identify the top 10  
8 source countries (in absolute numbers; appendix 1) for immigrant TB in Norway, and then calculated  
9 the TB notification rate (NR) in Norway based on the number of observation years, corrected for  
10 emigration (table 1).  
11

### 12 **Assumptions and definitions**

13 We calculated the number of arriving immigrants aged < 35 years from the top 10 source countries  
14 for TB in Norway and for countries with WHO-estimated TB IRs > 150/100,000 population in the  
15 period 2008-2011.<sup>6</sup> A positive interferon-gamma release assay (IGRA) was used as a proxy for LTBI.  
16 The estimated percentage of immigrants with a positive IGRA was based on published literature, and  
17 ranged from 18% to 29%, depending on the WHO-estimated TB IR in the country of origin and the  
18 age group; 0-14 years and 15-35 years.<sup>8-10</sup>  
19

20 We calculated the probability that a foreign-born patient notified to MSIS with TB in 2008-  
21 2015 was diagnosed with TB within the first 5 years after arrival (based on the date of clinical sample  
22 collection for TB diagnosis) and was aged < 40 years at diagnosis (eligible for screening on arrival and  
23 within 5 years). Within this relatively short time period, infection was considered to have occurred  
24 abroad prior to entry. Similar calculations were performed for LTBI treatment, based on the date of  
25 notification.  
26

27 We then calculated the total number of individuals with TB or LTBI treatment by multiplying  
28 the number of patients by the adjusted probability that they immigrated to Norway in 2008-2011.  
29 When information about time since arrival was missing, we calculated the weighted probability of  
30 time since immigration separately for each country of origin, and corrected for missing data based on  
31 the country-specific distribution of this information.  
32

33 We excluded individuals who were diagnosed with TB (based on the date of sample  
34 collection for TB diagnosis) within 1 month after arrival, as these individuals were most likely ill on  
35 arrival (co-prevalent TB) and TB would not be preventable through LTBI screening and treatment. For  
36 sensitivity analysis, we also excluded individuals who were notified within 1-6 months. These cases  
37 may or may not have been preventable through LTBI management. Based on this uncertainty, we  
38 present NNSs and NNTs separately for TB diagnosed >1 and >6 months after arrival, and applied  
39 these two definitions of incident TB throughout the study.  
40  
41

### 42 **NNS and NNT**

43 We estimated the NNS to prevent one incident TB case by calculating the ratio of the number of  
44 arriving immigrants to the number of incident TB cases observed in Norway within 5 years.  
45

46 We estimated the crude NNT as the ratio of the number of individuals testing positive for  
47 LTBI to the number of incident TB cases observed in Norway. This NNT can be interpreted as a  
48 combined effect of emigration and TB risk. As emigration is substantial in some groups, we also  
49 estimated time in Norway before emigration and used this value to calculate corrected NNTs as  
50 1/risk of preventable TB in the case of no emigration from Norway. This number can be interpreted  
51 as the TB risk corrected for the effect of migration (appendix 2).  
52

53 We explored the sensitivity of these estimates regarding test sensitivity and treatment  
54 efficacy and adherence to treatment using an extreme value approach. IGRA sensitivity was  
55 estimated to be 84% (with 81% and 87% applied as extreme values),<sup>11,12</sup> and chemoprophylaxis  
56 efficacy was estimated to be 65% (50%-80%),<sup>1,13</sup> consistent with a UK study.<sup>4</sup> The rate of treatment  
57  
58  
59

1  
2  
3 adherence was estimated to be 90% (80%-100%), according to published<sup>14-16</sup> and unpublished  
4 Norwegian data. The number of incident TB cases was adjusted accordingly and defined as  
5 preventable TB (table 2).

6 We then explored correlation with 95% confidence intervals (CIs) of the NNT with the TB NR  
7 in Norway and WHO-estimated TB IR.  
8

### 9 **Prevented TB and timing of LTBI treatment**

10 We calculated the expected number of incident TB cases prevented by the LTBI treatments during  
11 the study period by multiplying the number of LTBI treatments by the subsequent risk of preventable  
12 TB in different time periods (based on MSIS data). The calculations were limited to the first 5 years in  
13 Norway (e.g. if a person received LTBI treatment after 4 years in Norway, LTBI treatment would have  
14 a preventive effect for only 1 year). We assumed that a person did not leave Norway after receiving  
15 LTBI treatment, and assumptions were based on incident TB > 1 month after arrival. We calculated  
16 the percentage increase in prevented TB (potential for additional prevention) when LTBI treatment  
17 was initiated within the first (i) 6 months and (ii) 12 months after arrival to Norway (based on the  
18 84% sensitivity/65% treatment effectiveness/90% adherence estimates and incident TB > 1 month  
19 after arrival). The outcome reflects a combination of the times of TB diagnosis and LTBI treatment, or  
20 a strong effect of one of them.  
21  
22  
23

### 24 **Patient and Public Involvement**

25 Patients and or the public were not involved in the study  
26

## 27 **RESULTS**

28  
29 The majority of foreign-born TB patients in Norway originated from the Horn of Africa; Somalia alone  
30 accounted for 44% of TB cases from the top 10 source countries (table 1). Overall, a high proportion  
31 of TB occurred within the first year after arrival, with some variation among source countries. The  
32 fraction of observation years lost due to emigration was substantial in some groups and varied  
33 among source countries (table 1).  
34

35 Most immigrants from the Horn of Africa, Afghanistan, and Myanmar arrived as refugees and  
36 asylum seekers (figure 1). Most immigrants from Vietnam, Thailand, and Pakistan arrived for family  
37 reunification, whereas immigrants from India arrived for family reunification and work, and the  
38 majority of immigrants from the Philippines came to work as au-pairs.  
39

40 > Insert figure 1 about here <  
41

42 Overall, estimated NNSs and NNTs were high (table 2). Estimates were lowest for Somalia: screening  
43 of 70-105 and treatment of 14-28 Somali immigrants was required to prevent one incident TB case.  
44 Estimates were lowest when we corrected for the effect of emigration and applied the 1-month  
45 threshold to define incident TB (table 2). The same pattern was seen for all countries. NNTs were  
46 highest for immigrants from Pakistan and Thailand, although NNSs were substantially higher for  
47 Thailand. For most source countries, the number of preventable TB cases was reduced by one-third  
48 when the 6-month definition of incident TB was applied compared with the 1-month definition, but  
49 with variation (range 16%-75%).  
50

51 We found a stronger numerical correlation between the TB NR in Norway and NNT to  
52 prevent one incident TB case [correlation coefficient (CC) -0.75 (95% CI -1.05 to -0.44)] than between  
53 the NNT and WHO-estimated IR in the country of origin [CC -0.32 (95% CI -0.93 to 0.29)] for the top  
54 10 source countries for TB in Norway (using corrected NNTs and the 6-month definition of incident  
55 TB). The CCs were affected only modestly by emigration and definition of incident TB, and unaffected  
56  
57  
58  
59



1  
2  
3 by the extreme value approach (data not shown). The WHO-estimated TB IRs in Somalia and Pakistan  
4 in 2013 were similar (274 and 270/100,000 person-years). These values contrast with our findings  
5 that NNTs were lowest for Somali immigrants and among the highest for Pakistani immigrants. The  
6 WHO-estimated TB IR in the Philippines is high, and the NNTs and NNTs were high in our setting.  
7 NNTs for immigrants from Pakistan and Thailand were similar, although the estimated TB IR is  
8 substantially lower in Thailand than in Pakistan. When eligibility for screening was based on TB IRs in  
9 countries of origin, NNTs were fairly similar for the different thresholds and highest for those with IRs  
10 > 200/100,000, including Eritrea and Afghanistan. Estimates were lowest for immigrants from the  
11 Horn of Africa.  
12

13 Only a small percentage (range 3% - 21%) of LTBI-positive immigrants were estimated to  
14 have received LTBI treatment (table 3). The resulting estimated number of incident TB cases  
15 prevented by LTBI treatment was therefore modest, with a limited overall public-health impact of the  
16 immigrant LTBI screening programme in Norway in this period.  
17

18 Almost half (range 30%-58%) of LTBI treatments were prescribed >12 months after arrival in  
19 Norway (table 3). The highest percentages were for immigrants from the Horn of Africa, where most  
20 incident TB occurs. A substantial proportion of additional incident TB cases could have been  
21 prevented if the same number of LTBI treatments had been prescribed sooner after arrival (table 3).  
22  
23  
24  
25  
26  
27  
28  
29  
30  
31  
32  
33  
34  
35  
36  
37  
38  
39  
40  
41  
42  
43  
44  
45  
46  
47  
48  
49  
50  
51  
52  
53  
54  
55  
56  
57  
58  
59  
60

**Table 1** TB and LTBI among immigrants aged < 35 years arriving in Norway in 2008-2011 by country of origin. (Only top ten source countries for TB in Norway listed by country).

| Country of origin<br>(WHO estimated<br>annual TB incidence<br>rate per 100,000) <sup>a</sup> | Arrivals in<br>Norway in<br>2008-2011 <sup>b</sup><br>(<35 years)<br>(n) | Estimated<br>no. of<br>LTBI<br>cases <sup>c</sup><br>(n) | Notified TB in<br>Norway first 5<br>years after arrival<br>(<40 years)<br>(n) | NR <sup>d</sup> | Time in Norway prior to TB<br>diagnosis (months) |            |             |              | TB within<br>12 m<br>after<br>arrival<br>(%) | Person-years<br>under<br>observation <sup>e</sup><br>(n) | Observation<br>years lost<br>due to<br>emigration <sup>f</sup><br>(proportion) |
|----------------------------------------------------------------------------------------------|--------------------------------------------------------------------------|----------------------------------------------------------|-------------------------------------------------------------------------------|-----------------|--------------------------------------------------|------------|-------------|--------------|----------------------------------------------|----------------------------------------------------------|--------------------------------------------------------------------------------|
|                                                                                              |                                                                          |                                                          |                                                                               |                 | < 1<br>(n)                                       | 1-6<br>(n) | 7-12<br>(n) | 13-60<br>(n) |                                              |                                                          |                                                                                |
| By country                                                                                   |                                                                          |                                                          |                                                                               |                 |                                                  |            |             |              |                                              |                                                          |                                                                                |
| Myanmar (369)                                                                                | 900                                                                      | 255                                                      | 18                                                                            | 419             | 1                                                | 7          | 4           | 6            | 67                                           | 4300                                                     | 0.06                                                                           |
| Philippines (288)                                                                            | 6700                                                                     | 1909                                                     | 64                                                                            | 358             | 1                                                | 29         | 14          | 20           | 69                                           | 17,900                                                   | 0.47                                                                           |
| Somalia (274)                                                                                | 7400                                                                     | 2019                                                     | 252                                                                           | 900             | 23                                               | 74         | 54          | 101          | 60                                           | 28,000                                                   | 0.25                                                                           |
| Pakistan (270)                                                                               | 2000                                                                     | 520                                                      | 12                                                                            | 174             | 0                                                | 3          | 2           | 7            | 42                                           | 6900                                                     | 0.29                                                                           |
| Ethiopia (207)                                                                               | 2400                                                                     | 651                                                      | 46                                                                            | 667             | 5                                                | 8          | 9           | 24           | 48                                           | 6900                                                     | 0.42                                                                           |
| Afghanistan (189)                                                                            | 6800                                                                     | 1417                                                     | 44                                                                            | 238             | 4                                                | 10         | 7           | 23           | 48                                           | 18,500                                                   | 0.46                                                                           |
| Thailand (171)                                                                               | 3900                                                                     | 776                                                      | 20                                                                            | 120             | 1                                                | 6          | 2           | 11           | 45                                           | 16,600                                                   | 0.14                                                                           |
| India (167)                                                                                  | 2800                                                                     | 682                                                      | 18                                                                            | 167             | 1                                                | 3          | 2           | 12           | 28                                           | 10,800                                                   | 0.23                                                                           |
| Vietnam (140)                                                                                | 900                                                                      | 177                                                      | 12                                                                            | 364             | 0                                                | 9          | 1           | 2            | 83                                           | 3300                                                     | 0.25                                                                           |
| Eritrea (78)                                                                                 | 6900                                                                     | 1888                                                     | 82                                                                            | 307             | 10                                               | 21         | 15          | 36           | 56                                           | 26,700                                                   | 0.22                                                                           |
| Horn of Africa <sup>g</sup>                                                                  | 16,700                                                                   | 4558                                                     | 418                                                                           | 679             | 38                                               | 141        | 78          | 161          | 61                                           | 61,600                                                   | 0.26                                                                           |
| Countries grouped by estimated TB incidence rate <sup>a</sup>                                |                                                                          |                                                          |                                                                               |                 |                                                  |            |             |              |                                              |                                                          |                                                                                |
| >150/100,000                                                                                 | 37,100                                                                   | 7058                                                     | 533                                                                           | 446             | 43                                               | 161        | 104         | 225          | 58                                           | 119,400                                                  | 0.36                                                                           |
| >200/100,000                                                                                 | 23,300                                                                   | 5485                                                     | 428                                                                           | 595             | 35                                               | 137        | 87          | 169          | 61                                           | 72,000                                                   | 0.38                                                                           |
| >200/100,000 incl <sup>h</sup>                                                               | 37,000                                                                   | 8692                                                     | 554                                                                           | 473             | 49                                               | 167        | 110         | 228          | 59                                           | 117,200                                                  | 0.37                                                                           |

TB, tuberculosis; NR, notification rate per 100,000 person years under observation; LTBI, latent tuberculosis infection.

<sup>a</sup> From the 2014 World Health Organisation Global tuberculosis control report.<sup>6</sup>

<sup>b</sup> Number of immigrants, rounded to the nearest hundred. Data were obtained from Statistics Norway and the Norwegian Directorate of Immigration.

<sup>c</sup> Interferon-gamma release assay positivity was used as a proxy for LTBI (estimates are based on published data).

<sup>d</sup> Based on estimated total number of person years under observation.

<sup>e</sup> Adjusted according to estimated time in Norway before emigration for immigrants arriving in Norway in 2008-2011.

<sup>f</sup> Estimated proportion observation years lost due to emigration within the first 5 years after arrival

<sup>g</sup> Including Somalia, Eritrea, and Ethiopia.

<sup>h</sup> Includes countries with TB IRs > 200/100,000 and Eritrea and Afghanistan (in line with current Norwegian guidelines).

**Table 2** Estimated numbers of preventable TB cases and the numbers of immigrants needed to screen (NNS) and to treat (NNT) for latent tuberculosis infection to prevent one case of tuberculosis in the first five years after arrival, among immigrants arriving in Norway 2008-2011.

| Country of origin<br>(WHO estimated<br>TB incidence rate<br>per 100,000) <sup>a</sup> | Incident TB based on diagnosis $\geq$ 1 month after arrival |                     |                            |                                   | Incident TB based on diagnosis > 6 months after arrival |                  |                            |                                   |
|---------------------------------------------------------------------------------------|-------------------------------------------------------------|---------------------|----------------------------|-----------------------------------|---------------------------------------------------------|------------------|----------------------------|-----------------------------------|
|                                                                                       | Preventable<br>TB <sup>b</sup>                              | NNS <sup>c, d</sup> | NNT, crude <sup>c, e</sup> | NNT,<br>corrected <sup>c, f</sup> | Preventable<br>TB <sup>c</sup>                          | NNS <sup>c</sup> | NNT, crude <sup>c, e</sup> | NNT,<br>corrected <sup>c, f</sup> |
| By country                                                                            |                                                             |                     |                            |                                   |                                                         |                  |                            |                                   |
| Myanmar (369)                                                                         | 8 (12–6)                                                    | 111 (78–168)        | 30 (22–46)                 | na*                               | 5 (7–3)                                                 | 181 (128–274)    | 50 (35–76)                 | *na                               |
| Philippines (288)                                                                     | 31 (44–20)                                                  | 218 (154–330)       | 62 (44–94)                 | 59 (42–89)                        | 16 (23–11)                                              | 419 (296–635)    | 119 (84–180)               | 104 (74–158)                      |
| Somalia (274)                                                                         | 113 (159–74)                                                | 66 (47–100)         | 18 (13–27)                 | 13 (10–20)                        | 75 (107–50)                                             | 99 (70–150)      | 27 (19–41)                 | 17 (12–26)                        |
| Pakistan (270)                                                                        | 6 (9–4)                                                     | 319 (225–484)       | 85 (60–129)                | 75 (53–113)                       | 4 (6–3)                                                 | 440 (311–668)    | 117 (83–178)               | 94 (67–143)                       |
| Ethiopia (207)                                                                        | 20 (29–13)                                                  | 118 (83–179)        | 32 (23–49)                 | 23 (16–34)                        | 16 (22–10)                                              | 152 (108–231)    | 42 (29–63)                 | 26 (19–40)                        |
| Afghanistan (189)                                                                     | 20 (28–13)                                                  | 347 (245–526)       | 72 (51–109)                | 46 (32–69)                        | 15 (22–10)                                              | 444 (313–673)    | 92 (65–140)                | 54 (38–82)                        |
| Thailand (171)                                                                        | 9 (13–6)                                                    | 414 (292–628)       | 83 (59–126)                | 78 (55–119)                       | 7 (9–4)                                                 | 585 (413–887)    | 117 (83–178)               | 111 (79–169)                      |
| India (167)                                                                           | 8 (12–6)                                                    | 334 (236–506)       | 82 (58–124)                | 75 (53–113)                       | 7 (10–5)                                                | 396 (279–600)    | 97 (68–147)                | 89 (63–135)                       |
| Vietnam (140)                                                                         | 6 (8–4)                                                     | 151 (107–229)       | 30 (21–46)                 | 28 (20–42)                        | 1 (2–1)                                                 | 605 (427–917)    | 120 (85–182)               | 93 (66–141)                       |
| Eritrea (78)                                                                          | 35 (50–23)                                                  | 194 (137–295)       | 53 (38–81)                 | 43 (31–65)                        | 24 (34–16)                                              | 286 (202–433)    | 78 (55–119)                | 56 (40–85)                        |
| Horn of Africa <sup>g</sup>                                                           | 168 (238–111)                                               | 99 (70–151)         | 26 (18–39)                 | 14 (10–21)                        | 115 (163–76)                                            | 145 (103–220)    | 38 (27–58)                 | 16 (12–25)                        |
| Countries grouped by estimated TB incidence rate <sup>a</sup>                         |                                                             |                     |                            |                                   |                                                         |                  |                            |                                   |
| >150/100,000                                                                          | 241 (341–159)                                               | 154 (109–234)       | 32 (23–49)                 | 23 (16–35)                        | 160 (226–105)                                           | 232 (164–352)    | 48 (34–73)                 | 30 (21–45)                        |
| >200/100,000                                                                          | 193 (274–127)                                               | 121 (85–183)        | 28 (20–43)                 | 20 (15–31)                        | 124 (175–82)                                            | 188 (133–286)    | 44 (31–67)                 | 27 (19–41)                        |
| >200/100,00 incl <sup>h</sup>                                                         | 248 (351–164)                                               | 149 (105–226)       | 35 (25–53)                 | 23 (16–34)                        | 163 (231–108)                                           | 227 (160–344)    | 53 (38–81)                 | 29 (20–43)                        |

Estimates include TB occurring after 1 and 6 months and within the first 5 years following arrival in Norway, 2008-2011.

TB, tuberculosis; NNS and NNT, numbers needed to screen and treat to prevent one incident TB case within the first 5 years after arrival.

\*Emigration is minimal (na) since the majority arrived as refugees under the United Nations High Commissioner for Refugees and were granted residency prior to arrival

<sup>a</sup> From the 2014 World Health Organisation Global tuberculosis control report.<sup>6</sup>

<sup>b</sup> Number of TB patients notified from screening cohorts, adjusted regarding diagnostic test sensitivity, treatment efficacy, and adherence.

<sup>c</sup> Using the point estimate with (range) of sensitivity, efficacy, and adherence estimates.

<sup>d</sup> Ratio of the number of new arrivals to the number of preventable TB cases observed in Norway.

<sup>e</sup> Ratio of the number of latent tuberculosis infection and preventable TB cases observed in Norway, i.e. combined effect of emigration and risk of TB.

<sup>f</sup> 1 / risk of preventable TB for a person who stayed in Norway for 5 years, i.e. corrected for the effect of emigration.

<sup>g</sup> Including Somalia, Eritrea, and Ethiopia.

<sup>h</sup> Includes countries with TB IRs > 200/100,000 and Eritrea and Afghanistan (in line with current Norwegian guidelines).

**Table 3** Estimated numbers of tuberculosis cases prevented by latent tuberculosis infection treatment of immigrants during the first 5 years after arrival in Norway, 2008-2011.

| Country of origin<br>(WHO estimated<br>TB incidence rate<br>per 100,000) <sup>a</sup> | TB<br>notificati<br>on (<40<br>years) | LTBI<br>treatment<br>(<40<br>years) <sup>b</sup> | Time of LTBI treatment<br>after arrival (months) |      |       | LTBI<br>treatment<br>> 12 m<br>after<br>arrival | Number of<br>incident TB cases<br>prevented by<br>LTBI treatment<br>(range) <sup>c</sup> | Additional preventable incident TB<br>cases if all LTBI treatments were<br>initiated within 6 or 12 months<br>after arrival |               |
|---------------------------------------------------------------------------------------|---------------------------------------|--------------------------------------------------|--------------------------------------------------|------|-------|-------------------------------------------------|------------------------------------------------------------------------------------------|-----------------------------------------------------------------------------------------------------------------------------|---------------|
|                                                                                       |                                       |                                                  | ≤6                                               | 7-12 | 13-60 |                                                 |                                                                                          | 6 months (%)                                                                                                                | 12 months (%) |
|                                                                                       | (n)                                   | (n, %)                                           | (n)                                              | (n)  | (n)   | (%)                                             | (n)                                                                                      |                                                                                                                             |               |
| <b>By country</b>                                                                     |                                       |                                                  |                                                  |      |       |                                                 |                                                                                          |                                                                                                                             |               |
| Myanmar (369)                                                                         | 18                                    | 54 (21)                                          | 23                                               | 15   | 16    | 30                                              | 3 (4–2)                                                                                  | 21                                                                                                                          | 9             |
| Philippines (288)                                                                     | 64                                    | 200 (10)                                         | 61                                               | 68   | 71    | 35                                              | 2 (3–1)                                                                                  | 57                                                                                                                          | 11            |
| Somalia (274)                                                                         | 252                                   | 391 (19)                                         | 64                                               | 113  | 215   | 55                                              | 19 (27–13)                                                                               | 38                                                                                                                          | 15            |
| Pakistan (270)                                                                        | 12                                    | 16 (3)                                           | 4                                                | 4    | 9     | 52                                              | 0.2 (0.2–0.1)                                                                            | 22                                                                                                                          | 7             |
| Ethiopia (207)                                                                        | 46                                    | 108 (17)                                         | 13                                               | 37   | 58    | 54                                              | 3 (5–2)                                                                                  | 15                                                                                                                          | 8             |
| Afghanistan (189)                                                                     | 44                                    | 159 (11)                                         | 32                                               | 54   | 74    | 46                                              | 3 (4–2)                                                                                  | 18                                                                                                                          | 7             |
| Thailand (171)                                                                        | 20                                    | 53 (7)                                           | 13                                               | 15   | 25    | 47                                              | 0.5 (0.7–0.3)                                                                            | 30                                                                                                                          | 4             |
| India (167)                                                                           | 18                                    | 21 (3)                                           | 6                                                | 8    | 7     | 33                                              | 0.2 (0.3–0.2)                                                                            | 10                                                                                                                          | 2             |
| Vietnam (140)                                                                         | 12                                    | 26 (15)                                          | 8                                                | 10   | 8     | 32                                              | 0.5 (0.6–0.3)                                                                            | 99                                                                                                                          | 4             |
| Eritrea (78)                                                                          | 82                                    | 195 (10)                                         | 21                                               | 60   | 113   | 58                                              | 3 (6–2)                                                                                  | 42                                                                                                                          | 16            |
| Horn of Africa <sup>d</sup>                                                           | 380                                   | 694 (15)                                         | 98                                               | 210  | 386   | 56                                              | 36 (50–24)                                                                               | 23                                                                                                                          | 11            |
| Countries grouped by estimated TB incidence rate <sup>a</sup>                         |                                       |                                                  |                                                  |      |       |                                                 |                                                                                          |                                                                                                                             |               |
| >150/100,000                                                                          | 533                                   | 1193 (17)                                        | 267                                              | 381  | 545   | 46                                              | 36 (51–24)                                                                               | 30                                                                                                                          | 10            |
| >200/100,000                                                                          | 428                                   | 900 (16)                                         | 198                                              | 288  | 414   | 46                                              | 30 (42–20)                                                                               | 34                                                                                                                          | 12            |
| >200/100,000 incl <sup>e</sup>                                                        | 554                                   | 1252 (14)                                        | 250                                              | 402  | 600   | 48                                              | 39 (55–26)                                                                               | 29                                                                                                                          | 11            |

TB, tuberculosis; LTBI, latent tuberculosis infection; m, months

<sup>a</sup> From the 2014 World Health Organisation Global tuberculosis control report.<sup>6</sup>

<sup>b</sup> Number and percentage of LTBI positive persons with LTBI treatment.

<sup>c</sup> Highest and lowest estimates using the point estimate with (range) of diagnostic test sensitivity, treatment efficacy, and adherence estimates.

<sup>d</sup> Including Somalia, Eritrea, and Ethiopia.

<sup>e</sup> Includes countries with TB IRs > 200/100,000 and Eritrea and Afghanistan (in line with current Norwegian guidelines).

## DISCUSSION

The NNS and NNT to prevent one adverse outcome are measures used to communicate the effectiveness of health care interventions.<sup>17</sup> In this study of the immigrant LTBI screening programme in Norway, we found overall very high NNSs and NNTs to prevent one incident TB case, and higher than in a previous studies.<sup>4 18</sup> Screening based on the TB NR in Norway rather than the TB IRs in source countries improved targeting of immigrants for LTBI management. However, NNSs and NNTs remained high for most countries by either approach, even when we applied the most optimistic estimates for test sensitivity, treatment effectiveness, and treatment adherence.

### Strengths and limitations

The strengths of this study include the availability of detailed country-specific administrative immigration and emigration data, the high sensitivity of the TB and LTBI surveillance system, and the performance of comprehensive sensitivity analyses for the different estimates. Given the availability of information on time in Norway prior to TB diagnosis or LTBI treatment from MSIS, we were able to demonstrate the effect of intervention timing. This approach has important clinical implications. Lastly, the overall consistency with the UK study<sup>4</sup> makes comparison possible.

Study limitations include the currently weak monitoring and evaluation system of the Norwegian LTBI screening programme. Multiple service providers are involved in the screening process, with no harmonisation of data collection or follow-up documentation. Substantial delays in the provision of government-issued personal ID numbers to recent immigrants, specifically asylum seekers, have compromised follow-up and data linkage. For the same reason, we could not calculate NNTs based on absolute risk reduction in LTBI-treated individuals.

Screening coverage is high among asylum seekers and refugees, but less known for other immigrant groups (family reunification, students and immigrant workers). If screening participation was non-selective, it would not affect our estimates. However, if the prevalence of LTBI differed among those screened and not screened, our estimates may be biased.

Norwegian guidelines encourage treatment of individuals at greatest risk of progression to TB. If LTBI-positive individuals prescribed LTBI treatment were at greater risk than untreated LTBI-positive individuals, we may have underestimated the number of incident TB cases prevented by LTBI treatment during the study period. We may also have underestimated the overall impact of the screening programme, as incident TB occurring >5 years after arrival was not included. However, whether incident TB occurring several years after arrival is related to initial infection or subsequent re-infection is difficult to evaluate in long-term follow-up studies. A Dutch study of molecular data in contacts showed that 83% of incident cases occurred within 5 years of the source case and >95% occurred within 10 years,<sup>19</sup> suggesting that the degree of potential underestimation was modest. Finally, the effects of screening for TB and LTBI are difficult to disentangle, as they contribute to each other.

### Comparison with other studies

A UK study documented substantial variation in NNSs and NNTs among immigrants from the 10 most commonly reported source countries for TB in the UK.<sup>4</sup> The figures contrasted with estimated TB IRs in the source countries. Similarly, we found great variation in NNSs and NNTs, which were not consistently related to estimated WHO TB IRs in source countries. Immigrants may originate from specific geographical areas with higher or lower rates than national averages, and their socio-economic circumstances before and after arrival in host countries may differ. Surprisingly, the estimated NNTs for source countries were considerably higher in Norway than in the UK. In the current study, we differentiated between co-prevalent and incident TB and accounted for

1  
2  
3 emigration; both factors have profound impacts on NNTs and were not assessed in the UK study.<sup>6</sup>  
4 Immigrants are screened soon after arrival in Norway, and many leave the country before the end of  
5 the 5-year observation period. In contrast, the UK study examined long-term immigrants. Differences  
6 in TB epidemiology may also contribute to the observed differences. The UK researchers reported  
7 higher TB rates, and therefore also higher transmission rates, than in most Western European  
8 countries, specifically in larger cities.<sup>20</sup> The higher estimates for treatment adherence in this study  
9 compared with the UK study would narrow, rather than widen, the difference in NNTs.

10  
11 A mathematical modelling study from Australia found that a combination of screening and  
12 subsequent treatment of all LTBI positive immigrants would result in an overall reduction in number  
13 of TB cases of about one-third to one-half from 2013 - 2050.<sup>18</sup> The NNSs were 297 for all immigrants  
14 and 136 for immigrants originating from countries with an estimated TB IR >100/100 000, which is  
15 somewhat lower than in the current study. As in the UK study the model was based on permanent  
16 arrivals.

### 17 18 19 **Challenges of NNS/NNT estimation in immigrant screening**

20 The lifetime age-weighted risk of TB following infection in settings with low exogenous re-infection is  
21 estimated to be 12%.<sup>21</sup> The reported low pooled positive predictive value of the IGRA (2.7%)  
22 corresponds to an NNT of 37 across different settings and populations.<sup>22</sup> This corresponds to 111  
23 months of treatment to prevent one TB case in need of 6 months of treatment. Thus, the risk  
24 reduction following LTBI treatment must be large to reduce the NNT. Although morbidity, mortality,  
25 and transmission can be avoided if TB is prevented, the benefit of LTBI treatment for the individual  
26 should outweigh the risk of severe adverse effects. Although LTBI treatment is safe overall, it carries  
27 a risk of severe and potentially life-threatening toxic adverse effects.<sup>23</sup>

28  
29 Register data did not allow us to clearly distinguish co-prevalent TB from TB that developed  
30 later and was potentially preventable through LTBI management (incident TB). LTBI is considered to  
31 comprise a spectrum of infection states.<sup>24</sup> A prolonged asymptomatic phase of early subclinical TB  
32 may precede clinical presentation with active disease.<sup>25 26</sup> A pre- and post-arrival evaluation of a  
33 cohort of US immigrants reported that >80% of TB cases diagnosed within 1 year of receiving pre-  
34 arrival examination represented co-prevalent TB.<sup>26</sup> TB diagnosed <1 month after arrival is clearly not  
35 preventable, whereas TB diagnosis within 1-6 months may or may not be preventable. Based on this  
36 uncertainty, we presented NNSs and NNTs separately for TB diagnosed >1 and >6 months after  
37 arrival.

38  
39 Emigration was substantial in some groups. Immigrants to Norway from Myanmar were  
40 almost exclusively refugees under the United Nations High Commissioner for Refugees and were  
41 granted residency prior to arrival, whereas applications from adult asylum seekers from Afghanistan  
42 commonly were rejected. The observation years lost due to emigration were also substantial in other  
43 groups with high proportions of asylum seekers. Immigrants from the Philippines often arrive as au-  
44 pairs and are granted only 2-year work permits. Emigration may also lead to NNT overestimation if  
45 immigrants who show LTBI positivity on screening upon arrival in Norway develop TB after  
46 emigration.

### 47 48 49 **The effect of timeliness of screening and treatment**

50 In this study, fewer than one in five estimated LTBI-positive individuals (if all immigrants were  
51 screened) was treated. This gap in the *intention to screen is intention to treat* principle represents a  
52 challenge and has been reported in other Norwegian studies;<sup>27 28</sup> it has been due partly to Norwegian  
53 guidelines (in which the groups targeted for screening has been wider than those targeted for  
54 treatment), and measures have been taken to minimise it.<sup>7</sup> It may, however, also signal that the  
55  
56  
57  
58  
59

number of LTBI-positive individuals is too high for the health services to treat, and/or that clinicians are reluctant to initiate LTBI treatment in individuals with unknown risk of progression to disease.

As a high proportion of incident TB cases occur early after arrival, an important component to improve the impact of the screening programme would be to ensure expedited follow-up and LTBI treatment initiation. The reduced risk of progression to TB over time will increase NNT estimates with time, and delayed follow-up represents missed opportunities. The potential for additional prevented cases varied across countries of origin. The high potential for additional prevention among immigrants from Vietnam reflects the high proportions of those who are ill early after arrival and those for whom LTBI treatment is initiated late, whereas the opposite was observed for India.

### Public health implications

The overall high NNSs and NNTs in this study call into question whether routine LTBI screening of immigrants in a high-income low-incidence country is feasible, safe and effective, without the application of additional selection criteria. Although LTBI management based on TB notification in Norway rather than WHO estimated IRs in countries of origin would have improved the targeting of immigrants, the NNSs and NNTs remained high. This is in line with a recently published systematic review on the effectiveness of LTBI screening among migrants in the EU/EEA, in which the authors conclude that the effectiveness of LTBI programmes is limited due to the large pool of immigrants with LTBI, suboptimal diagnostic tests and weak care cascade, and that high screening uptake and treatment completion will ensure greatest benefit on both the individual and the public health level.<sup>29</sup>

The estimated number of incident TB cases prevented by LTBI treatment was modest suggesting that substantial scale-up of the LTBI care cascade is necessary to strengthen the public health impact. Until new tests with higher predictive values for TB are available,<sup>23</sup> there are two complementary approaches to reduce the NNSs and NNTs. Firstly, screening could be limited to immigrants with additional risk factors for disease, such as young age, recent known contact, abnormal x-ray findings, and immunosuppressive conditions. This approach, however, will require additional resources to correctly identify risk groups on entry. Secondly, the LTBI care cascade could be improved so that further examinations and treatment are offered sooner following a positive LTBI screening test. The programme has the potential to prevent additional TB cases if more immigrants with LTBI are offered treatment, and this treatment starts sooner after arrival.

Monitoring of the effectiveness of screening should urgently be improved. The data in Norway are better than in many other countries, but still with wide uncertainty. As immigration trends and composition and health services vary considerably among countries, better monitoring and evaluation of current screening programmes are needed so that countries can adjust their policies based on the yield of screening.

Even when applying the most optimistic estimates regarding diagnostic test sensitivity, treatment efficacy, and adherence to treatment, a substantial proportion of incident TB cases will not be prevented through LTBI screening and management. Easy and equitable access to health care services for all should remain a cornerstone of tuberculosis control and prevention so that clinical cases are detected and treated early.

### Ethical approval

Ethical approval of the study was obtained from Regional Committee for Medical and Health Research Ethics, south east Norway (2017/164).

### Funding statement

The Norwegian Health Association funded this study.

**Competing interests statement**

None declared.

**Authors' contributions**

BAW initiated the study, and BAW and EH wrote the protocol. BAW, RW, and GMG were responsible for modelling and analyses; BAW, RW and EH drafted the manuscript; and BAW, PA, PAA, EH, RW, and GMG provided input to discussions. All authors have read and approved the final version of the manuscript.

**Data sharing statement**

Do not send my information to Dryad



1  
2  
3  
4  
5  
6  
7  
8  
9  
10  
11  
12  
13  
14  
15  
16  
17  
18  
19  
20  
21  
22  
23  
24  
25  
26  
27  
28  
29  
30  
31  
32  
33  
34  
35  
36  
37  
38  
39  
40  
41  
42  
43  
44  
45  
46  
47  
48  
49  
50  
51  
52  
53  
54  
55  
56  
57  
58  
59  
60

**Figure legends**

**Figure 1** Reasons for immigration for immigrants aged < 35 years arriving in Norway in 2008-2011, by country of origin (%).

For peer review only

## REFERENCES

1. WHO. Guidelines for the management of latent tuberculosis infection. Geneva 2014 [cited 28.10.2014]. Available from: [http://www.who.int/tb/publications/ltbi\\_document\\_page/en/](http://www.who.int/tb/publications/ltbi_document_page/en/).
2. WHO. Latent TB Infection: Updated and consolidated guidelines for programmatic management. Geneva 2018 [cited 05.04.2018] Available from: <http://www.who.int/tb/publications/2018/latent-tuberculosis-infection/en/>
3. Kunst H, Burman M, Arnesen TM, et al. Tuberculosis and latent tuberculosis infection screening of migrants in Europe: comparative analysis of policies, surveillance systems and results. *Int J Tuberc Lung Dis* 2017;21(8):840-51.
4. Kruijshaar ME, Abubakar I, Stagg HR, et al. Migration and tuberculosis in the UK: targeting screening for latent infection to those at greatest risk of disease. *Thorax* 2013;68(12):1172-4.
5. Arnesen TM, Haldal E, Mengshoel AT, et al. Tuberkulose i Norge i 2016 med behandlingsresultater for 2015. In: Folkehelseinstituttet, ed. Oslo, 2017.
6. WHO. Global tuberculosis report. Geneva, Switzerland 2014. [cited 20.02.2016] Available from: <http://www.who.int/tb/publications/2014/en/>
7. Folkehelseinstituttet. Guidelines for prevention and control of tuberculosis Oslo: Norwegian Institute of Public Health; 2016 [cited 23.06.2017] Available from: <https://www.fhi.no/nettpub/tuberkuloseveilederen>
8. Pareek M, Bond M, Shorey J, et al. Community-based evaluation of immigrant tuberculosis screening using interferon gamma release assays and tuberculin skin testing: observational study and economic analysis. *Thorax* 2013;68(3):230-9.
9. Pareek M, Watson JP, Ormerod LP, et al. Screening of immigrants in the UK for imported latent tuberculosis: a multicentre cohort study and cost-effectiveness analysis. *The Lancet infectious diseases* 2011;11(6):435-44.
10. Winje BA, Oftung F, Korsvold GE, et al. Screening for tuberculosis infection among newly arrived asylum seekers: comparison of QuantiFERONTB Gold with tuberculin skin test. *BMC Infect Dis* 2008;8:65.
11. Pai M, Denkinger CM, Kik SV, et al. Gamma interferon release assays for detection of Mycobacterium tuberculosis infection. *Clin Microbiol Rev* 2014;27(1):3-20.
12. Diel R, Lodenkemper R, Nienhaus A. Evidence-based comparison of commercial interferon-gamma release assays for detecting active TB: a metaanalysis. *Chest* 2010;137(4):952-68.
13. Stagg HR, Zenner D, Harris RJ, et al. Treatment of Latent Tuberculosis Infection: A Network Meta-analysis. *Ann Intern Med* 2014 doi: 10.7326/M14-1019
14. Olsen AIM, Andersen HE, Amus J, et al. Management of latent tuberculosis infection in Norway in 2009: a descriptive cross-sectional study. *Public Health Action* 2013;3(2) [published Online First: 21/06/2013]
15. Erkens CG, Slump E, Verhagen M, et al. Monitoring latent tuberculosis infection diagnosis and management in the Netherlands. *Eur Respir J* 2016;47(5):1492-501.
16. Kan B, Kalin M, Bruchfeld J. Completing treatment for latent tuberculosis: patient background matters. *The international journal of tuberculosis and lung disease : the official journal of the International Union against Tuberculosis and Lung Disease* 2013;17(5):597-602.
17. Laupacis A, Sackett DL, Roberts RS. An assessment of clinically useful measures of the consequences of treatment. *N Engl J Med* 1988;318(26):1728-33.
18. Denholm JT, McBryde ES. Can Australia eliminate TB? Modelling immigration strategies for reaching MDG targets in a low-transmission setting. *Aust N Z J Public Health* 2014;38(1):78-82.
19. Borgdorff MW, Sebek M, Gesskus RB, et al. The incubation period distribution of tuberculosis estimated with a molecular epidemiological approach. *Int J Epidemiol* 2011;40(4):964-70.
20. Kirby T. Tuberculosis rates unacceptably high in UK cities. *The Lancet infectious diseases* 2013;13(10):836-7.

- 1
- 2
- 3 21. Vynnycky E, Fine PE. The natural history of tuberculosis: the implications of age-dependent risks
- 4 of disease and the role of reinfection. *Epidemiol Infect* 1997;119(2):183-201.
- 5 22. Diel R, Loddenkemper R, Nienhaus A. Predictive value of interferon-gamma release assays and
- 6 tuberculin skin testing for progression from latent TB infection to disease state: a meta-
- 7 analysis. *Chest* 2012;142(1):63-75.
- 8 23. Kunst H, Khan KS. Age-related risk of hepatotoxicity in the treatment of latent tuberculosis
- 9 infection: a systematic review. *International Journal of Tuberculosis & Lung Disease*
- 10 2010;14(11):1374-81.
- 11 24. Esmail H, Barry CE, 3rd, Young DB, et al. The ongoing challenge of latent tuberculosis. *Philos Trans*
- 12 *R Soc Lond B Biol Sci* 2014;369(1645):20130437.
- 13 25. Dheda K, Barry CE, 3rd, Maartens G. Tuberculosis. *Lancet* 2016;387(10024):1211-26.
- 14 26. Walter ND, Painter J, Parker M, et al. Persistent latent tuberculosis reactivation risk in United
- 15 States immigrants. *American journal of respiratory and critical care medicine* 2014;189(1):88-
- 16 95.
- 17 27. Harstad I, Jacobsen GW. Poor follow-up after screening for tuberculosis. *TidsskrNor Laegeforen*
- 18 2012;132(1):14-16.
- 19 28. Harstad I, Jacobsen GW, Heldal E, et al. The role of entry screening in case finding of tuberculosis
- 20 among asylum seekers in Norway. *BMCPublic Health* 2010;10:670.
- 21 29. Greenaway C, Pareek M, Chakra C, et al. The effectiveness and cost-effectiveness of screening for
- 22 latent tuberculosis among migrants in the EU/EEA: a systematic review *Eurosurveillance*
- 23 2018;23(14) [published Online First: 05/Apr/2018]
- 24
- 25
- 26
- 27
- 28
- 29
- 30
- 31
- 32
- 33
- 34
- 35
- 36
- 37
- 38
- 39
- 40
- 41
- 42
- 43
- 44
- 45
- 46
- 47
- 48
- 49
- 50
- 51
- 52
- 53
- 54
- 55
- 56
- 57
- 58
- 59
- 60

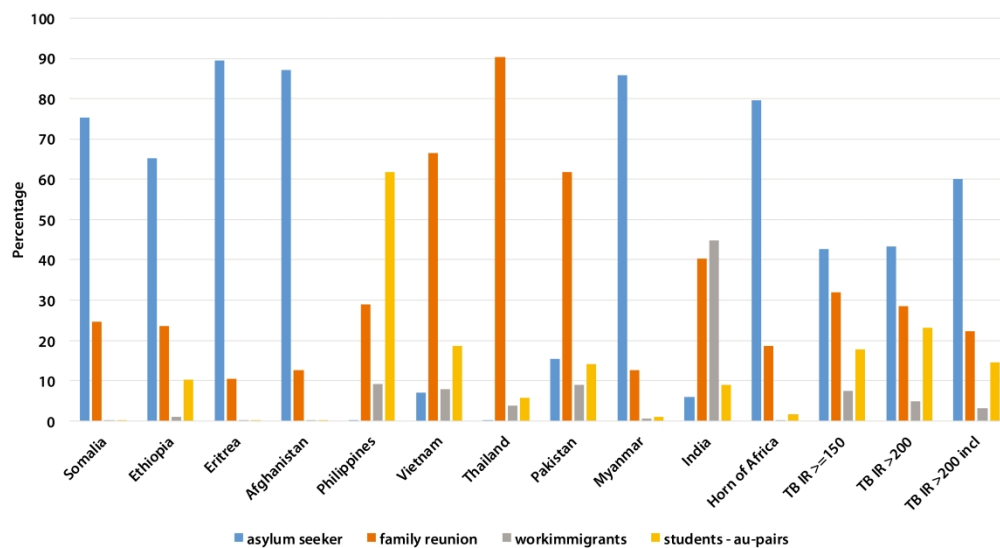

Figure 1 Reasons for immigration for immigrants aged < 35 years arriving in Norway in 2008-2011, by country of origin (%).

Appendix 1. Number of notified TB cases from the top ten source countries for immigrant TB in Norway, 2008-2015 (Source: MSIS\*)

| Countries   | 2008 | 2009 | 2010 | 2011 | 2012 | 2013 | 2014 | 2015 | Total |
|-------------|------|------|------|------|------|------|------|------|-------|
| Somalia     | 70   | 106  | 72   | 106  | 112  | 102  | 84   | 47   | 699   |
| Eritrea     | 12   | 24   | 16   | 20   | 23   | 41   | 47   | 49   | 232   |
| Philippines | 20   | 14   | 25   | 23   | 30   | 25   | 26   | 25   | 188   |
| Pakistan    | 20   | 18   | 23   | 20   | 15   | 18   | 15   | 8    | 137   |
| Ethiopia    | 9    | 27   | 17   | 14   | 15   | 16   | 17   | 15   | 130   |
| Afghanistan | 7    | 10   | 19   | 16   | 11   | 18   | 11   | 26   | 118   |
| Thailand    | 10   | 16   | 15   | 10   | 11   | 8    | 14   | 13   | 97    |
| Vietnam     | 10   | 15   | 12   | 11   | 7    | 15   | 12   | 7    | 89    |
| India       | 7    | 9    | 7    | 4    | 11   | 12   | 9    | 6    | 65    |
| Myanmar     | 11   | 6    | 10   | 8    | 7    | 7    | 3    | 2    | 54    |

\*MSIS, Norwegian Surveillance System for Infectious Diseases

Appendix 2. Estimates of number of immigrants eligible for screening, distribution of age and time in Norway and data sources

| Information                                                                                                           | Estimates                                                                                                                                                                                                                                                                                                                                                                                                                                                                                                                                                                                                             | Sources                                                                                                               |
|-----------------------------------------------------------------------------------------------------------------------|-----------------------------------------------------------------------------------------------------------------------------------------------------------------------------------------------------------------------------------------------------------------------------------------------------------------------------------------------------------------------------------------------------------------------------------------------------------------------------------------------------------------------------------------------------------------------------------------------------------------------|-----------------------------------------------------------------------------------------------------------------------|
| Immigrants eligible for screening (<35 yrs on arrival)<br>Percentage of eligible immigrants aged 0-14 and 15-34 years | <b>Refugees:</b> 83% < 35 yrs. Among them 18% were 0-14 years and 82% were 15-34 years. <b>Family-reunion:</b> 80% < 35 years, among them 44% were 0-14 years and 56% were 15-34 yrs. <b>Work immigrants:</b> 70%, among them all were 15-34 yrs. <b>Students and au-pairs:</b> 95% < 35 years, among them all were 15-34 years                                                                                                                                                                                                                                                                                       | UDI <sup>I</sup> for refugees<br>SSB <sup>II</sup> – age distribution of immigrants in 2014 by reason for immigration |
| Adjusted observation time based on emigration for refugees                                                            | <b>Refugees:</b> percentile distribution of time before final rejection of application for residency<br><b>Other immigrant groups:</b> Aggregated data based on reason for immigration<br><b>Family reunion:</b> each individual contributes on average 4.5 observation years out of 5, equals 90% under observation for scaled arrivals<br><b>Work immigrants:</b> contributes on average 4.2 observation years out of 5, equals 84% under observation for scaled arrivals<br><b>Students and au-pairs:</b> contributes on average 1,74 observation years out of 5, equals 35% under observation for scaled arrivals | UDI <sup>I</sup> for refugees and SSB <sup>II</sup> for the remaining immigrant groups                                |

<sup>I</sup> UDI, Norwegian Directorate of Immigration

<sup>II</sup> SSB, Statistics Norway

# BMJ Open

## Immigrant screening for latent tuberculosis infection – numbers needed to test and treat: A Norwegian population-based cohort study

|                                 |                                                                                                                                                                                                                                                                                                                                                                                                                                                                                                                                                                                                                                                                                      |
|---------------------------------|--------------------------------------------------------------------------------------------------------------------------------------------------------------------------------------------------------------------------------------------------------------------------------------------------------------------------------------------------------------------------------------------------------------------------------------------------------------------------------------------------------------------------------------------------------------------------------------------------------------------------------------------------------------------------------------|
| Journal:                        | <i>BMJ Open</i>                                                                                                                                                                                                                                                                                                                                                                                                                                                                                                                                                                                                                                                                      |
| Manuscript ID                   | bmjopen-2018-023412.R1                                                                                                                                                                                                                                                                                                                                                                                                                                                                                                                                                                                                                                                               |
| Article Type:                   | Research                                                                                                                                                                                                                                                                                                                                                                                                                                                                                                                                                                                                                                                                             |
| Date Submitted by the Author:   | 11-Oct-2018                                                                                                                                                                                                                                                                                                                                                                                                                                                                                                                                                                                                                                                                          |
| Complete List of Authors:       | Winje, Brita; Norwegian Institute of Public Health, Department of vaccine preventable diseases<br>Groneng, Gry ; Norwegian Institute of Public Health, Department of Infectious Disease Epidemiology and Modelling<br>White, Richard; Norwegian Institute of Public Health, Department of Infectious Disease Epidemiology and Modelling<br>Akre, Peter ; Norwegian Directorate of Immigration, Statistics and Analysis Division<br>Aavitsland, Preben; Norwegian Institute of Public Health; University of Oslo, Institute of Health and Society<br>Heldal, Einar; Norwegian Institute of Public Health, Department of Tuberculosis, Blood-Borne and Sexually Transmitted Infections |
| <b>Primary Subject Heading</b>: | Infectious diseases                                                                                                                                                                                                                                                                                                                                                                                                                                                                                                                                                                                                                                                                  |
| Secondary Subject Heading:      | Public health                                                                                                                                                                                                                                                                                                                                                                                                                                                                                                                                                                                                                                                                        |
| Keywords:                       | Tuberculosis < INFECTIOUS DISEASES, Latent tuberculosis infection, Screening, Number needed to treat, Preventive treatment                                                                                                                                                                                                                                                                                                                                                                                                                                                                                                                                                           |
|                                 |                                                                                                                                                                                                                                                                                                                                                                                                                                                                                                                                                                                                                                                                                      |

SCHOLARONE™  
Manuscripts

1  
2  
3  
4  
5 **Immigrant screening for latent tuberculosis infection – numbers**  
6  
7 **needed to test and treat: A Norwegian population-based cohort**  
8  
9 **study**  
10  
11  
12  
13  
14

15 **\*Brita Askeland Winje**, Department of Vaccine-Preventable Diseases, Norwegian Institute of Public  
16 Health, Oslo, Norway. E-mail: [brita.winje@fhi.no](mailto:brita.winje@fhi.no)  
17

18  
19  
20 **Gry Marysol Grøneng**, Department of Infectious Disease Epidemiology and Modelling, Norwegian  
21 Institute of Public Health, Oslo, Norway. E-mail: [GryMarysol.Groneng@fhi.no](mailto:GryMarysol.Groneng@fhi.no)  
22

23  
24  
25 **Richard White** Department of Infectious Disease Epidemiology and Modelling, Norwegian Institute of  
26 Public Health, Oslo, Norway. E-mail: [Richard.White@fhi.no](mailto:Richard.White@fhi.no)  
27

28  
29  
30 **Peter Akre**, Statistics and Analysis Division, Norwegian Directorate of Immigration, Oslo, Norway. E-mail:  
31 [paj@udi.no](mailto:paj@udi.no)  
32

33 **Preben Aavitsland**, Norwegian Institute of Public Health, Oslo, and Institute of Health and Society,  
34 University of Oslo, Norway. E-mail: [preben.aavitsland@fhi.no](mailto:preben.aavitsland@fhi.no)  
35

36  
37  
38 **Einar Heldal**, Department of Tuberculosis, Blood-Borne and Sexually Transmitted Infections, Norwegian  
39 Institute of Public Health, Oslo, Norway. E-mail: [einari.heldal@fhi.no](mailto:einari.heldal@fhi.no)  
40

41  
42  
43  
44  
45 \*Corresponding author  
46  
47  
48  
49  
50  
51  
52  
53

54 Word count: 4900 words  
55  
56  
57  
58  
59  
60

1  
2  
3 Key words: tuberculosis, latent tuberculosis infection, screening, preventive treatment, number needed  
4 to test, number needed to treat  
5  
6  
7  
8  
9  
10  
11  
12  
13  
14  
15  
16  
17  
18  
19  
20  
21  
22  
23  
24  
25  
26  
27  
28  
29  
30  
31  
32  
33  
34  
35  
36  
37  
38  
39  
40  
41  
42  
43  
44  
45  
46  
47  
48  
49  
50  
51  
52  
53  
54  
55  
56  
57  
58  
59  
60

For peer review only



## ABSTRACT

**Objectives** Estimate the numbers needed to screen (NNS) and treat (NNT) to prevent one tuberculosis (TB) case in the Norwegian immigrant LTBI screening programme, and to explore the effect of delay of LTBI treatment initiation.

**Design** Population-based prospective cohort study

**Participants** Immigrants to Norway

**Outcome** Incident TB

**Methods** We obtained aggregated data on immigration to Norway in 2008-2011 and used data from the Norwegian Surveillance System for Infectious Diseases to assess the number of TB cases arising in this cohort within 5 years after arrival. We calculated average NNSs and NNTs for immigrants from the top 10 source countries for TB in Norway and by estimated TB incidence rates (IRs) in source countries. We explored the sensitivity of these estimates regarding test performance, treatment efficacy, and treatment adherence using an extreme value approach, and assessed the effects of emigration, time to TB diagnosis (to define incident TB), and intervention timing.

### Results

NNSs and NNTs were overall high, with substantial variation. The NNT showed numerically stronger negative correlation with the TB notification rate in Norway [-0.75 (95% CI 1.00 to -0.44)] than with the World Health Organisation IR [-0.32 (95% CI -0.93 to 0.29)]. NNTs were affected substantially by emigration and the definition of incident TB. Estimates were lowest for Somali [NNS 99 (70-150), NNT 27 (19-41)] and highest for Thai immigrants [NNS 585 (413-887), NNT 117 (83-178)]. Implementing LTBI treatment in immigrants sooner after arrival may improve the effectiveness of the programme.

### Conclusions

Using TB notifications in Norway, rather than IR in source countries, would improve targeting of immigrants for LTBI management. However, the overall high NNT is a concern and challenges the scale-up of preventive LTBI treatment for significant public-health impact. Better data are urgently needed to monitor and evaluate NNS and NNT in countries implementing LTBI screening.

### Strengths and limitations of this study

- The study benefitted from access to high quality national data over several years, including immigration and surveillance data, allowing for calculation of group and country specific emigration numbers, providing a strong estimate of the person-time observation for recent immigrants.
- The way in which we constructed our dataset allowed for the inclusion of high quality data from multiple sources. With this, we were able to investigate the effect of LTBI treatment initiation within the first six versus 12 months after arrival.
- A methodological strength is that, through the extreme value approach, we include the results under a variety of estimates for LTBI test sensitivity, treatment efficacy and adherence to treatment.
- Our calculations relied on the proportion of individuals testing positive with IGRA (proxy for LTBI), which was based on published literature rather than individual data. This may bias our results in either direction.
- From register data, we could not clearly disentangle those who were ill on arrival (co-prevalent TB) from cases that were potentially preventable through LTBI management (incident TB).

## BACKGROUND

The World Health Organisation (WHO) have issued guidelines for the programmatic management of latent tuberculosis infection (LTBI).<sup>1,2</sup> The guidelines strongly recommend screening for and treatment of LTBI in groups at high-risk for tuberculosis (TB) and conditionally in recent immigrants from high- to low TB incidence countries.<sup>1</sup> LTBI is common and the risk of progression to TB varies substantially among individuals, assumed to reflect age, time since infection, and host immune status.<sup>1</sup>

The identification of target immigrant groups for LTBI management remains challenging in most low-TB incidence settings. There has been a call for the harmonisation of migrant screening policies across Europe.<sup>3</sup> Eligibility for screening is commonly based on the TB IR in the country of origin or the reason for immigration, with typical focus on asylum seekers and refugees.<sup>3</sup> It has, however, been suggested that the targeting of immigrants based on the TB IR in the host country may improve the effectiveness of immigrant screening programmes.<sup>4</sup>

In Norway, foreign-born individuals account for almost 90% of TB notifications and the majority are diagnosed in the first 5 years after arrival.<sup>5</sup> Based on molecular surveillance of *Mycobacterium tuberculosis* strains, the majority of TB in the foreign-born population is assumed to reflect reactivation of LTBI acquired prior to arrival.<sup>5</sup> Against this backdrop, Norway has a well-established immigrant screening programme for TB and LTBI. Immigrants are currently targeted for TB screening based on the WHO-estimated TB incidence rates (IRs) in their countries of birth.<sup>6</sup> Immigrants younger than 35 years are also targeted for LTBI management to prevent future development of TB. The eligibility for arrival LTBI screening has differed over time; in March 2017 the IR cut-off value was changed from >40/100,000 to >200/100,000 (including immigrants from Afghanistan and Eritrea).<sup>7</sup> The monitoring and evaluation system of the long-standing TB and LTBI screening programme is weak.

The primary objective of this study was to use aggregated numbers of Norwegian immigration and individual level TB surveillance data to estimate the of number needed to screen (NNS) and number needed to treat (NNT) with LTBI chemoprophylaxis to prevent one TB case in the immigrant LTBI screening programme. Secondary objectives were to estimate the number of TB cases prevented by the current strategy in a 4-year cohort of immigrants, and to explore the effect of delay of LTBI treatment initiation within the first 6 months versus the 12 months after arrival, using the same immigration and surveillance data.

## METHODS

### Data sources and creation of data set for modelling and analysis

We combined aggregate numbers from Norwegian immigration data (i.e. information on the entire cohort) and individual level TB surveillance data (i.e. information on individuals with TB or LTBI treatment) to create a unified dataset for modelling and analysis. All steps are described in the text below. A complete overview is also presented in table format in appendices 1a-d.

### Data and sources

#### *Immigration and emigration data*

We have used administrative data on immigration by year, country of origin, and reason for immigration in Norway in 2008-2011. Data were obtained separately from two different sources: the Norwegian Directorate of Immigration (UDI) for newly arrived asylum seekers and from Statistics Norway (SSB) for other immigrant groups. The number of immigrants is based on number of asylum applications and

number of residence permits for other immigrant groups. Country of origin reflects citizenship for asylum seekers and country of birth for other immigrant groups. We estimated the proportion aged <15 years and 15-35 years by country, reason for immigration and year of immigration based on the reported age-distribution from SSB/UDI (appendix 1a). As emigration from Norway is substantial in some immigrant groups, we obtained aggregated administrative data on time spent in Norway before emigration from the same sources (further described below). In the model, we have assumed that immigrants who received residence permit or applied for asylum actually immigrated to Norway and that immigrants who were later registered as emigrated, or had a final rejection of application for asylum, actually emigrated (appendix 1c).

#### *TB cases and LTBI treatment*

For individuals with TB and LTBI treatment (i.e. the people of interest), individual-level demographic and clinical information was obtained from the Norwegian Surveillance System for Infectious Diseases (MSIS) for the years 2008-2016. This time-period allows for five years observation time for all immigrants. The information included age at notification, country of birth, date of notification, date of diagnosis (collection of clinical sample) and date of start of treatment. Further, on the MSIS notification form, clinicians report time in Norway prior to diagnosis for foreign-born individuals using the following categories: <1 month, 1-6 months, 7-12 months, 1-2 years, 3-4 years, 5-9 years, and >10 years. Date of arrival is not reported.

It is mandatory for laboratories and clinicians to report TB diagnosis and treatment outcome, and prescription of LTBI treatment, to MSIS. Untreated LTBI is not reported. The sensitivity of MSIS data is assumed to be high because notifications are sent from multiple sources and are checked routinely against TB drug prescriptions.

We used all TB notifications to MSIS in 2008-2015 (year of reporting) to identify the top 10 source countries (in absolute numbers; appendix 2) for immigrant TB in Norway and then calculated the TB notification rate (NR) in Norway based on the number of observation years.

#### **Construction of analysis dataset**

Based on the aggregated immigration data we calculated the number of arriving immigrants aged  $\leq 35$  years from the top 10 source countries for TB in Norway and for countries with WHO-estimated TB IRs > 150/100,000 population in the period 2008-2011.<sup>6</sup> We used the WHO Global TB Report 2014 estimates of TB IR in countries of origin in 2013.<sup>6</sup>

#### *Estimated prevalence of LTBI*

We used a positive IGRA as a proxy for LTBI. The prevalence of IGRA positives was based on published literature, including Norwegian data on asylum seekers,<sup>8</sup> and ranged from 18% to 29%, depending on the WHO-estimated TB IR in the country of origin and the age group; 0-14 years and 15-35 years.<sup>8-10</sup> The number of immigrants with LTBI in the model was estimated by multiplying the number of arriving immigrants with the published estimates of IGRA positives, separately for the two age-groups. In the model, we have assumed that the age- and country specific prevalence of LTBI from published literature, including Norwegian data, is a fair proxy for the LTBI prevalence in the arrival cohort.

#### *TB and LTBI treatments in the 2008-2011 immigrant cohort*

We used the categorical information about time in Norway prior to diagnosis from MSIS to estimate a probability distribution for each case's arrival year in Norway (e.g. "a case received a diagnosis in December 2010 and has been in Norway for <1 month, therefore they have 100% probability that they arrived in Norway in 2010 and belong to the 2008-2011 immigrant cohort", "a case received a diagnosis in March 2012 and has been in Norway for 1-6 months, therefore they have a 50% probability that they arrived in Norway in 2011, and 50% probability that they arrived in Norway in 2012"). When information about time since arrival was missing, we imputed this information by applying the country-specific probability distribution for time-in-Norway. We then estimated the number of individuals with TB or LTBI treatment who belonged to the 2008-2011 cohort of immigrants by multiplying the number of cases by the probability that they immigrated to Norway in 2008-2011.

We excluded individuals who were diagnosed with TB (based on the date of sample collection for TB diagnosis) within 1 month after arrival, as these individuals were most likely ill on arrival (co-prevalent TB) and TB would not be preventable through LTBI screening and treatment. For sensitivity analysis, we also excluded individuals who were notified within 1-6 months. These cases may or may not have been preventable through LTBI management. Based on this uncertainty, we present NNSs and NNTs separately for TB diagnosed >1 and >6 months after arrival, and applied these two definitions of incident TB throughout the study.

#### *Estimation of time in Norway*

Since emigration is substantial in some immigrant groups, we estimated the cumulative probability of time under observation in Norway based on UDI/SSB administrative data. For asylum seekers, data on emigration was obtained as percentile distributions of number of days from application date to date of final rejection of application, e.g. among 421 asylum seekers from Somalia who arrived in Norway in 2008 and whose application for asylum later was rejected, 10% were rejected within 62 days, 20% were rejected within 87 days and so on up until the 90% percentile. We used this information to calculate the number of person-years of observation lost due to emigration within the first five years after arrival in Norway. This was done separately by country, TB IR in country of citizenship and by year.

For other immigrant groups, data on emigration was based on aggregated September 2014 data, containing the number of immigrants per year and the number of them that emigrated before September 2014 (separately by reason for immigration). See Table 1 for an example of the data and the formulae used to estimate the cumulative probability distribution for duration of time in Norway for the cohort.

Table 1. The cumulative probability distribution for duration of time in Norway for immigrants other than asylum seekers.

| Year of arrival (X) | Number arrived in year X | Number emigrated before 09/2014 | Average time in Norway as of 09/2014 | cumulative proportion staying in Norway as of 09/2014 |
|---------------------|--------------------------|---------------------------------|--------------------------------------|-------------------------------------------------------|
| 2008                | D1                       | N1                              | 6,25                                 | 1-N1/D1                                               |
| 2009                | D2                       | N2                              | 5,25                                 | 1-N2/D2                                               |
| 2010                | D3                       | N3                              | 4,25                                 | 1-N3/D3                                               |
| 2011                | D4                       | N4                              | 3,25                                 | 1-N4/D4                                               |

### *Finalizing dataset*

Using the prior pieces of information (number of people arriving each year, probability distribution of time to emigration, and for each TB/LTBI diagnosis – time since immigration and estimated year of arrival) we created a dataset containing yearly cohorts of people who immigrated to Norway between 2008 and 2011 and are followed up for either five years or until they emigrate from Norway (the shorter of the two).

### **Outcomes**

#### *Preventable TB/Risk of preventable TB*

We defined preventable TB as a patient notified with TB to MSIS and who: (i) arrived to Norway in 2008-2011, (ii) was notified to MSIS > 1 month (6 months) and < 5 years after arrival, (iii) was younger than 40 years of age at notification (to allow for five years observation time after screening). With this relatively short time period, we assume that they were infected prior to arrival in Norway. We explored the sensitivity of these estimates regarding test performance, treatment efficacy and adherence to treatment using an extreme value approach. IGRA sensitivity was estimated to be 84% (with 81% and 87% applied as extreme values)<sup>11 12</sup> and chemoprophylaxis efficacy was estimated to be 65% (50%-80%),<sup>13</sup> consistent with a UK study.<sup>4</sup> The rate of treatment adherence was estimated to be 90% (80%-100%), according to published<sup>14-16</sup> and unpublished Norwegian data. The number of incident TB cases was adjusted accordingly and defined as preventable TB (table 2). We excluded TB cases that were on TB treatment on arrival to Norway.

For each time period after arrival to Norway (<1 month, 1-6 months, 7-12 months, 1-2 years, 3-4 years, 5-9 years, and >10 years) we obtained the number of preventable TB cases and then calculated the risk of preventable TB per time period (i.e. number of cases divided by number of people). The risk of developing TB during this time period was then also converted into monthly risk using the formula  $1 - (1 - \text{totalrisk})^{(1/\text{number-months})}$ .

#### *NNS and NNT*

We estimated the NNS to prevent one incident TB case by calculating the ratio of the number of arriving immigrants to the number of preventable TB cases observed in Norway within 5 years. We used the extreme value approach to explore the sensitivity of these estimates.

We estimated the *crude NNT* as the ratio of the number of individuals testing positive for LTBI to the number of preventable TB cases. This NNT can be interpreted as a combined effect of emigration and TB risk (i.e. if someone emigrates from Norway they cannot receive a TB diagnosis in Norway, thus the more emigration the lower the risk for TB observed in Norway). We used the information on person years lost for observation due to emigration to calculate *corrected NNT* as  $1/(\text{risk of preventable TB in 5 years})$ . This number can be interpreted as the NNT if all immigrants remained in Norway for 5 years.

We then explored correlation with 95% confidence intervals (CIs) of the NNT with the TB NR in Norway and WHO-estimated TB IR. The purpose of this analysis was to identify which data source (TB NR in Norway or WHO-estimated TB IR) had a stronger association with public health implications in Norway (NNT).

#### *Prevented TB due to LTBI treatment and the effect delay of LTBI treatment initiation*

We estimated the expected number of TB prevented by the LTBI treatments provided during the study period. This was calculated by multiplying the number of LTBI treatments by the subsequent risk of

1  
2  
3 preventable TB in different time-periods (based on the categorical MSIS data on time since arrival). The  
4 calculations were limited to the first 5 years in Norway (e.g. if a person received LTBI treatment after 4  
5 years in Norway, LTBI treatment would have a preventive effect for only 1 year). In the model, we have  
6 assumed that all immigrants eligible for screening actually were screened and that they were screened  
7 soon after arrival in line with the mandatory screening programme. We further assumed that a person  
8 did not leave Norway after receiving LTBI treatment. Calculations were based on incident TB > 1 month  
9 after arrival.  
10

11 We calculated the percentage increase in prevented TB (potential for additional prevention)  
12 when LTBI treatment was initiated within the first (i) 6 months and (ii) 12 months after arrival to Norway  
13 (based on the 84% sensitivity/65% treatment effectiveness/90% adherence estimates and incident TB > 1  
14 month after arrival) through multiplying increased number of people screened by sensitivity by  
15 effectiveness by adherence. The outcome reflects a combination of the timing of TB diagnosis and LTBI  
16 treatment, or a strong effect of one of them.  
17  
18

### 19 **Uncertainty in the calculations**

20 None of the calculations in this study included uncertainty. Our model was primarily deterministic. The  
21 source of uncertainty in our study came from running our deterministic model with alternative IGRA  
22 sensitivities and treatment efficacies (the extreme value approach).  
23  
24

### 25 **Patient and Public Involvement**

26 Patients and or the public were not involved in the study  
27

## 28 **RESULTS**

29 The majority of foreign-born TB patients in Norway originated from the Horn of Africa; Somalia alone  
30 accounted for 44% of TB cases from the top 10 source countries (table 2). Overall, a high proportion of  
31 TB occurred within the first year after arrival, with some variation among source countries. The fraction  
32 of observation years lost due to emigration was substantial in some groups and varied among source  
33 countries (table 2).  
34

35 Most immigrants from the Horn of Africa, Afghanistan, and Myanmar arrived as refugees and  
36 asylum seekers (figure 1). Most immigrants from Vietnam, Thailand, and Pakistan arrived for family  
37 reunification, whereas immigrants from India arrived for family reunification and work, and the majority  
38 of immigrants from the Philippines came to work as au-pairs.  
39  
40  
41  
42  
43

44 > Insert figure 1 about here <

45 Overall, estimated NNSs and NNTs were high (table 3). Estimates were lowest for Somalia: screening of  
46 70-150 and treatment of 19-41 Somali immigrants was required to prevent one incident TB case (6  
47 months threshold for preventable TB). NNTs were lowest for estimates corrected for the effect of  
48 emigration and with the 1-month threshold to define incident TB, compared to the crude NNT and the 6  
49 months threshold (table 3). The same pattern was seen for all countries. NNTs were highest for  
50 immigrants from Pakistan and Thailand, although NNSs were substantially higher for Thailand. For most  
51 source countries, the number of preventable TB cases was reduced by one-third when the 6-month  
52 definition of incident TB was applied compared with the 1-month definition, but with variation (range  
53 16%-75%).  
54  
55  
56  
57

1  
2  
3 We found a stronger numerical correlation between the TB NR in Norway and NNT to prevent  
4 one incident TB case [correlation coefficient (CC) -0.75 (95% CI -1.00 to -0.44)] than between the NNT  
5 and WHO-estimated IR in the country of origin [CC -0.32 (95% CI -0.93 to 0.29)] for the top 10 source  
6 countries for TB in Norway (using corrected NNTs and the 6-month definition of incident TB). The CCs  
7 were affected only modestly by emigration and definition of incident TB, and unaffected by the extreme  
8 value approach (data not shown). The WHO-estimated TB IRs in Somalia and Pakistan in 2013 were  
9 similar (274 and 270/100,000 person-years). These values contrast with our findings that NNTs were  
10 lowest for Somali immigrants and among the highest for Pakistani immigrants. The WHO-estimated TB IR  
11 in the Philippines is high, and the NNTs and NNTs were high in our setting. NNTs for immigrants from  
12 Pakistan and Thailand were similar, although the estimated TB IR is substantially lower in Thailand than  
13 in Pakistan. When eligibility for screening was based on TB IRs in countries of origin, NNTs were fairly  
14 similar for the different thresholds and highest for those with IRs > 200/100,000, including Eritrea and  
15 Afghanistan. Estimates were lowest for immigrants from the Horn of Africa.

16  
17 Only a small percentage (range 3% - 21%) of LTBI-positive immigrants were estimated to have  
18 received LTBI treatment (table 4). The resulting estimated number of incident TB cases prevented by LTBI  
19 treatment was therefore modest, with a limited overall public-health impact of the immigrant LTBI  
20 screening programme in Norway in this period.

21  
22 Almost half (range 30%-58%) of LTBI treatments were prescribed >12 months after arrival in  
23 Norway (table 4). The highest percentages were for immigrants from the Horn of Africa, where most  
24 incident TB occurs. A substantial proportion of additional incident TB cases could have been prevented if  
25 the same number of LTBI treatments had been prescribed sooner after arrival (table 4).



**Table 2** TB and LTBI among immigrants aged < 35 years arriving in Norway in 2008-2011 by country of origin. (Only top ten source countries for TB in Norway listed by country).

| Country of origin<br>(WHO estimated<br>annual TB incidence<br>rate per 100,000) <sup>a</sup> | Arrivals in<br>Norway in<br>2008-2011 <sup>b</sup><br>(<35 years)<br>(n) | Estimated<br>no. of<br>LTBI<br>cases <sup>c</sup><br>(n) | Notified TB in<br>Norway first 5<br>years after arrival<br>(<40 years)<br>(n) | NR         | Time in Norway prior to TB<br>diagnosis (months) |            |             |              | TB within<br>12 m<br>after<br>arrival<br>(%) | Person-years<br>under<br>observation <sup>d</sup><br>(n) | Observation<br>years lost<br>due to<br>emigration <sup>e</sup><br>(proportion) |
|----------------------------------------------------------------------------------------------|--------------------------------------------------------------------------|----------------------------------------------------------|-------------------------------------------------------------------------------|------------|--------------------------------------------------|------------|-------------|--------------|----------------------------------------------|----------------------------------------------------------|--------------------------------------------------------------------------------|
|                                                                                              |                                                                          |                                                          |                                                                               |            | < 1<br>(n)                                       | 1-6<br>(n) | 7-12<br>(n) | 13-60<br>(n) |                                              |                                                          |                                                                                |
| By country                                                                                   |                                                                          |                                                          |                                                                               |            |                                                  |            |             |              |                                              |                                                          |                                                                                |
| Myanmar (369)                                                                                | 900                                                                      | 255                                                      | 18                                                                            | 419        | 1                                                | 7          | 4           | 6            | 67                                           | 4300                                                     | 0.06                                                                           |
| Philippines (288)                                                                            | 6700                                                                     | 1909                                                     | 64                                                                            | 358        | 1                                                | 29         | 14          | 20           | 69                                           | 17,900                                                   | 0.47                                                                           |
| Somalia (274)                                                                                | 7400                                                                     | 2019                                                     | 252                                                                           | 900        | 23                                               | 74         | 54          | 101          | 60                                           | 28,000                                                   | 0.25                                                                           |
| Pakistan (270)                                                                               | 2000                                                                     | 520                                                      | 12                                                                            | 174        | 0                                                | 3          | 2           | 7            | 42                                           | 6900                                                     | 0.29                                                                           |
| Ethiopia (207)                                                                               | 2400                                                                     | 651                                                      | 46                                                                            | 667        | 5                                                | 8          | 9           | 24           | 48                                           | 6900                                                     | 0.42                                                                           |
| Afghanistan (189)                                                                            | 6800                                                                     | 1417                                                     | 44                                                                            | 238        | 4                                                | 10         | 7           | 23           | 48                                           | 18,500                                                   | 0.46                                                                           |
| Thailand (171)                                                                               | 3900                                                                     | 776                                                      | 20                                                                            | 120        | 1                                                | 6          | 2           | 11           | 45                                           | 16,600                                                   | 0.14                                                                           |
| India (167)                                                                                  | 2800                                                                     | 682                                                      | 18                                                                            | 167        | 1                                                | 3          | 2           | 12           | 28                                           | 10,800                                                   | 0.23                                                                           |
| Vietnam (140)                                                                                | 900                                                                      | 177                                                      | 12                                                                            | 364        | 0                                                | 9          | 1           | 2            | 83                                           | 3300                                                     | 0.25                                                                           |
| Eritrea (78)                                                                                 | 6900                                                                     | 1888                                                     | 82                                                                            | 307        | 10                                               | 21         | 15          | 36           | 56                                           | 26,700                                                   | 0.22                                                                           |
| <i>Horn of Africa<sup>f</sup></i>                                                            | <i>16,700</i>                                                            | <i>4558</i>                                              | <i>380</i>                                                                    | <i>679</i> | <i>38</i>                                        | <i>103</i> | <i>78</i>   | <i>161</i>   | <i>58</i>                                    | <i>61,700</i>                                            | <i>0.26</i>                                                                    |
| Countries grouped by estimated TB incidence rate <sup>a</sup>                                |                                                                          |                                                          |                                                                               |            |                                                  |            |             |              |                                              |                                                          |                                                                                |
| >150/100,000                                                                                 | 37,100                                                                   | 7058                                                     | 533                                                                           | 446        | 43                                               | 161        | 104         | 225          | 58                                           | 119,400                                                  | 0.36                                                                           |
| >200/100,000                                                                                 | 23,300                                                                   | 5485                                                     | 428                                                                           | 595        | 35                                               | 137        | 87          | 169          | 61                                           | 72,000                                                   | 0.38                                                                           |
| >200/100,000 incl <sup>g</sup>                                                               | 37,000                                                                   | 8692                                                     | 554                                                                           | 473        | 49                                               | 167        | 110         | 228          | 59                                           | 117,200                                                  | 0.37                                                                           |

TB, tuberculosis; NR, notification rate per 100,000 person years under observation; LTBI, latent tuberculosis infection.  
<sup>a</sup> From the 2014 World Health Organisation Global tuberculosis control report.<sup>6</sup>  
<sup>b</sup> Number of immigrants, rounded to the nearest hundred. Data were obtained from Statistics Norway and the Norwegian Directorate of Immigration.  
<sup>c</sup> Interferon-gamma release assay positivity was used as a proxy for LTBI (estimates are based on published data, including Norwegian data).  
<sup>d</sup> Adjusted according to estimated time in Norway before emigration for immigrants arriving in Norway in 2008-2011.  
<sup>e</sup> Estimated proportion observation years lost due to emigration within the first 5 years after arrival  
<sup>f</sup> Including Somalia, Eritrea, and Ethiopia.  
<sup>g</sup> Includes countries with TB IRs > 200/100,000 and Eritrea and Afghanistan (in line with current Norwegian guidelines)

**Table 3** Estimated numbers of preventable TB cases and the numbers of immigrants needed to screen (NNS) and to treat (NNT) for latent tuberculosis infection to prevent one case of tuberculosis in the first five years after arrival, among immigrants arriving in Norway 2008-2011.

| Country of origin<br>(WHO estimated<br>TB incidence rate<br>per 100,000) <sup>a</sup> | Incident TB based on diagnosis $\geq$ 1 month after arrival |                    |                           |                                  | Incident TB based on diagnosis $>$ 6 months after arrival |                    |                           |                                  |
|---------------------------------------------------------------------------------------|-------------------------------------------------------------|--------------------|---------------------------|----------------------------------|-----------------------------------------------------------|--------------------|---------------------------|----------------------------------|
|                                                                                       | Preventable<br>TB <sup>b,c</sup>                            | NNS <sup>c,d</sup> | NNT, crude <sup>c,e</sup> | NNT,<br>corrected <sup>c,f</sup> | Preventable<br>TB <sup>b,c</sup>                          | NNS <sup>c,d</sup> | NNT, crude <sup>c,e</sup> | NNT,<br>corrected <sup>c,f</sup> |
| By country                                                                            |                                                             |                    |                           |                                  |                                                           |                    |                           |                                  |
| Myanmar (369)                                                                         | 8 (12–6)                                                    | 111 (78–168)       | 30 (22–46)                | na*                              | 5 (7–3)                                                   | 181 (128–274)      | 50 (35–76)                | *na                              |
| Philippines (288)                                                                     | 31 (44–20)                                                  | 218 (154–330)      | 62 (44–94)                | 59 (42–89)                       | 16 (23–11)                                                | 419 (296–635)      | 119 (84–180)              | 104 (74–158)                     |
| Somalia (274)                                                                         | 113 (159–74)                                                | 66 (47–100)        | 18 (13–27)                | 13 (10–20)                       | 75 (107–50)                                               | 99 (70–150)        | 27 (19–41)                | 17 (12–26)                       |
| Pakistan (270)                                                                        | 6 (9–4)                                                     | 319 (225–484)      | 85 (60–129)               | 75 (53–113)                      | 4 (6–3)                                                   | 440 (311–668)      | 117 (83–178)              | 94(67–143)                       |
| Ethiopia (207)                                                                        | 20 (29–13)                                                  | 118 (83–179)       | 32 (23–49)                | 23 (16–34)                       | 16 (22–10)                                                | 152 (108–231)      | 42 (29–63)                | 26 (19–40)                       |
| Afghanistan (189)                                                                     | 20 (28–13)                                                  | 347 (245–526)      | 72 (51–109)               | 46 (32–69)                       | 15 (22–10)                                                | 444 (313–673)      | 92 (65–140)               | 54 (38–82)                       |
| Thailand (171)                                                                        | 9 (13–6)                                                    | 414 (292–628)      | 83 (59–126)               | 78 (55–119)                      | 7 (9–4)                                                   | 585 (413–887)      | 117 (83–178)              | 111 (79–169)                     |
| India (167)                                                                           | 8 (12–6)                                                    | 334 (236–506)      | 82 (58–124)               | 75 (53–113)                      | 7 (10–5)                                                  | 396 (279–600)      | 97 (68–147)               | 89 (63–135)                      |
| Vietnam (140)                                                                         | 6 (8–4)                                                     | 151 (107–229)      | 30 (21–46)                | 28 (20–42)                       | 1 (2–1)                                                   | 605 (427–917)      | 120 (85–182)              | 93 (66–141)                      |
| Eritrea (78)                                                                          | 35 (50–23)                                                  | 194 (137–295)      | 53 (38–81)                | 43 (31–65)                       | 24 (34–16)                                                | 286 (202–433)      | 78 (55–119)               | 56 (40–85)                       |
| <i>Horn of Africa</i> <sup>g</sup>                                                    | 168 (238–111)                                               | 99 (70–151)        | 27 (19–41)                | 15 (11–23)                       | 115 (163–76)                                              | 145 (103–220)      | 40 (28–60)                | 18 (13–27)                       |
| Countries grouped by estimated TB incidence rate <sup>a</sup>                         |                                                             |                    |                           |                                  |                                                           |                    |                           |                                  |
| >150/100,000                                                                          | 241 (341–159)                                               | 154 (109–234)      | 32 (23–49)                | 23 (16–35)                       | 160 (226–105)                                             | 232 (164–352)      | 48 (34–73)                | 30 (21–45)                       |
| >200/100,000                                                                          | 193 (274–127)                                               | 121 (85–183)       | 28 (20–43)                | 20 (15–31)                       | 124 (175–82)                                              | 188 (133–286)      | 44 (31–67)                | 27 (19–41)                       |
| >200/100,00 incl <sup>h</sup>                                                         | 248 (351–164)                                               | 149 (105–226)      | 35 (25–53)                | 23 (16–34)                       | 163 (231–108)                                             | 227 (160–344)      | 53 (38–81)                | 29 (20–43)                       |

Estimates include TB occurring after 1 and 6 months and within the first 5 years following arrival in Norway, 2008-2011.

TB, tuberculosis; NNS and NNT, numbers needed to screen and treat to prevent one incident TB case within the first 5 years after arrival.

\*Emigration is minimal (na) since the majority arrived as refugees under the United Nations High Commissioner for Refugees and were granted residency prior to arrival

<sup>a</sup> From the 2014 World Health Organisation Global tuberculosis control report.<sup>6</sup>

<sup>b</sup> Number of TB patients notified from screening cohorts, adjusted regarding diagnostic test sensitivity, treatment efficacy, and adherence.

<sup>c</sup> Using the point estimate with (range) of sensitivity, efficacy, and adherence estimates.

<sup>d</sup> Ratio of the number of new arrivals to the number of preventable TB cases observed in Norway.

<sup>e</sup> Ratio of the number of latent tuberculosis infection and preventable TB cases observed in Norway, i.e. combined effect of emigration and risk of TB.

<sup>f</sup> 1 / risk of preventable TB for a person who stayed in Norway for 5 years, i.e. corrected for the effect of emigration.

<sup>g</sup> Including Somalia, Eritrea, and Ethiopia.

<sup>h</sup> Includes countries with TB IRs  $>$  200/100,000 and Eritrea and Afghanistan (in line with current Norwegian guidelines).

**Table 4** Estimated numbers of tuberculosis cases prevented by latent tuberculosis infection treatment of immigrants during the first 5 years after arrival in Norway, 2008-2011.

| Country of origin<br>(WHO estimated<br>TB incidence rate<br>per 100,000) <sup>a</sup> | TB<br>notificati<br>on (<40<br>years) | LTBI<br>treatment<br>(<40<br>years) <sup>b</sup> | Time of LTBI treatment<br>after arrival (months) |      |       | LTBI<br>treatment<br>> 12 m<br>after<br>arrival | Number of<br>incident TB cases<br>prevented by<br>LTBI treatment<br>(range) <sup>c</sup> | Additional preventable incident TB<br>cases if all LTBI treatments were<br>initiated within 6 or 12 months<br>after arrival |               |
|---------------------------------------------------------------------------------------|---------------------------------------|--------------------------------------------------|--------------------------------------------------|------|-------|-------------------------------------------------|------------------------------------------------------------------------------------------|-----------------------------------------------------------------------------------------------------------------------------|---------------|
|                                                                                       |                                       |                                                  | ≤6                                               | 7-12 | 13-60 |                                                 |                                                                                          | 6 months (%)                                                                                                                | 12 months (%) |
|                                                                                       | (n)                                   | (n, %)                                           | (n)                                              | (n)  | (n)   | (%)                                             | (n)                                                                                      |                                                                                                                             |               |
| <b>By country</b>                                                                     |                                       |                                                  |                                                  |      |       |                                                 |                                                                                          |                                                                                                                             |               |
| Myanmar (369)                                                                         | 18                                    | 54 (21)                                          | 23                                               | 15   | 16    | 30                                              | 3 (4–2)                                                                                  | 21                                                                                                                          | 9             |
| Philippines (288)                                                                     | 64                                    | 200 (10)                                         | 61                                               | 68   | 71    | 35                                              | 2 (3–1)                                                                                  | 57                                                                                                                          | 11            |
| Somalia (274)                                                                         | 252                                   | 391 (19)                                         | 64                                               | 113  | 215   | 55                                              | 19 (27–13)                                                                               | 38                                                                                                                          | 15            |
| Pakistan (270)                                                                        | 12                                    | 16 (3)                                           | 4                                                | 4    | 9     | 52                                              | 0.2 (0.2–0.1)                                                                            | 22                                                                                                                          | 7             |
| Ethiopia (207)                                                                        | 46                                    | 108 (17)                                         | 13                                               | 37   | 58    | 54                                              | 3 (5–2)                                                                                  | 15                                                                                                                          | 8             |
| Afghanistan (189)                                                                     | 44                                    | 159 (11)                                         | 32                                               | 54   | 74    | 46                                              | 3 (4–2)                                                                                  | 18                                                                                                                          | 7             |
| Thailand (171)                                                                        | 20                                    | 53 (7)                                           | 13                                               | 15   | 25    | 47                                              | 0.5 (0.7–0.3)                                                                            | 30                                                                                                                          | 4             |
| India (167)                                                                           | 18                                    | 21 (3)                                           | 6                                                | 8    | 7     | 33                                              | 0.2 (0.3–0.2)                                                                            | 10                                                                                                                          | 2             |
| Vietnam (140)                                                                         | 12                                    | 26 (15)                                          | 8                                                | 10   | 8     | 32                                              | 0.5 (0.6–0.3)                                                                            | 99                                                                                                                          | 4             |
| Eritrea (78)                                                                          | 82                                    | 195 (10)                                         | 21                                               | 60   | 113   | 58                                              | 3 (6–2)                                                                                  | 42                                                                                                                          | 16            |
| <i>Horn of Africa<sup>d</sup></i>                                                     | 380                                   | 694 (15)                                         | 98                                               | 210  | 386   | 56                                              | 32 (45–21)                                                                               | 25                                                                                                                          | 12            |
| Countries grouped by estimated TB incidence rate <sup>a</sup>                         |                                       |                                                  |                                                  |      |       |                                                 |                                                                                          |                                                                                                                             |               |
| >150/100,000                                                                          | 533                                   | 1193 (17)                                        | 267                                              | 381  | 545   | 46                                              | 36 (51–24)                                                                               | 30                                                                                                                          | 10            |
| >200/100,000                                                                          | 428                                   | 900 (16)                                         | 198                                              | 288  | 414   | 46                                              | 30 (42–20)                                                                               | 34                                                                                                                          | 12            |
| >200/100,000 incl <sup>e</sup>                                                        | 554                                   | 1252 (14)                                        | 250                                              | 402  | 600   | 48                                              | 39 (55–26)                                                                               | 29                                                                                                                          | 11            |

TB, tuberculosis; LTBI, latent tuberculosis infection

<sup>a</sup> From the 2014 World Health Organisation Global tuberculosis control report.<sup>6</sup>

<sup>b</sup> Percentage of LTBI positive persons with LTBI treatment.

<sup>c</sup> Highest and lowest estimates using the point estimate with (range) of sensitivity, efficacy, and adherence estimates.

<sup>d</sup> Including Somalia, Eritrea, and Ethiopia.

<sup>e</sup> Includes countries with TB IRs > 200/100,000 and Eritrea and Afghanistan (in line with current Norwegian guidelines).

## DISCUSSION

The NNS and NNT to prevent one adverse outcome are measures used to communicate the effectiveness of health care interventions.<sup>11</sup> In this study of the immigrant LTBI screening programme in Norway, we found overall very high NNSs and NNTs to prevent one incident TB case, and higher than in a previous studies.<sup>4,12</sup> Screening based on the TB NR in Norway rather than the TB IRs in source countries improved targeting of immigrants for LTBI management. However, NNSs and NNTs remained high for most countries by either approach, even when we applied the most optimistic estimates for test sensitivity, treatment effectiveness, and treatment adherence.

### Strengths and limitations

The strengths of this study include the availability of detailed country-specific administrative immigration and emigration data that provides a strong estimate of the person-time observation for recent immigrants, the high sensitivity of the TB and LTBI surveillance system, and the performance of comprehensive sensitivity analyses for the different estimates. Given the availability of information on time in Norway prior to TB diagnosis or LTBI treatment from MSIS, we were able to demonstrate the effect of intervention timing. This approach has important clinical implications. Lastly, the overall consistency with the UK study<sup>4</sup> makes comparison possible.

Study limitations include the currently weak monitoring and evaluation system of the Norwegian LTBI screening programme. Multiple service providers are involved in the screening process, with no harmonisation of data collection or follow-up documentation. Substantial delays in the provision of government-issued personal ID numbers to recent immigrants, specifically asylum seekers, have compromised follow-up and data linkage. For the same reason, we could not calculate NNTs based on absolute risk reduction in LTBI-treated individuals. The lack of denominator data is a common challenge in most countries, which renders immigrant screening programmes poorly evaluated. We have used comprehensive administrative data and high-coverage surveillance data including information on LTBI treatment, to overcome these limitations.

Screening coverage is high among asylum seekers and refugees, but less known for other immigrant groups (family reunification, students and immigrant workers). If screening participation was non-selective, it would not affect our estimates. However, if the prevalence of LTBI differed among those screened and not screened, our estimates may be biased.

The prevalence of LTBI in the arriving immigrant cohort was based on published literature, including Norwegian data on asylum seekers.<sup>8-10</sup> Whether these correctly reflects the prevalence of LTBI in the arriving cohort is unknown and this may potentially have biased our estimates in either direction. If the LTBI prevalence in the arriving immigrants was lower than estimated, the reported NNSs and NNTs would be too high, whereas with a higher prevalence than estimated our NNSs and NNTs would be too low.

Norwegian guidelines encourage treatment of individuals at greatest risk of progression to TB. If LTBI-positive individuals prescribed LTBI treatment were at greater risk than untreated LTBI-positive individuals, we may have underestimated the number of TB cases prevented by LTBI treatment during the study period. We may also have underestimated the overall benefit of the screening programme, as incident TB occurring >5 years after arrival was not included. However, whether incident TB occurring several years after arrival is related to initial infection or subsequent re-infection is difficult to evaluate in long-term follow-up studies. A Dutch study of molecular data in contacts showed that 83% of incident cases occurred within 5 years of the source case and >95% occurred within 10 years,<sup>13</sup> suggesting that

1  
2  
3 the degree of potential underestimation was modest. Finally, the effects of screening for TB and LTBI are  
4 difficult to disentangle, as they contribute to each other.  
5

### 6 7 **Comparison with other studies**

8 A UK study documented substantial variation in NNSs and NNTs among immigrants from the 10 most  
9 commonly reported source countries for TB in the UK.<sup>4</sup> The figures contrasted with estimated TB IRs in  
10 the source countries. Similarly, we found great variation in NNSs and NNTs, which were not consistently  
11 related to estimated WHO TB IRs in source countries. Immigrants may originate from specific  
12 geographical areas with higher or lower rates than national averages, and their socio-economic  
13 circumstances before and after arrival in host countries may differ. Surprisingly, the estimated NNTs for  
14 source countries were overall considerably higher in Norway than in the UK. NNTs for immigrants from  
15 Pakistan were 85 (60-129) and 34 (17-70), from Somalia 18 (13-27) and 4 (1-7) and from India 82 (58-  
16 124) and 37 (20-61) in Norway and UK respectively.<sup>4</sup> In the current study, we differentiated between co-  
17 prevalent and incident TB and accounted for emigration; both factors have profound impacts on NNTs  
18 and were not assessed in the UK study.<sup>6</sup> Immigrants are screened soon after arrival in Norway, and many  
19 leave the country before the end of the 5-year observation period. In contrast, the UK study examined  
20 long-term immigrants. Differences in TB epidemiology may also contribute to the observed differences.  
21 The UK researchers reported higher TB rates, and therefore also higher transmission rates, than in most  
22 Western European countries, specifically in larger cities.<sup>14</sup> The higher estimates for treatment adherence  
23 in this study compared with the UK study would narrow, rather than widen, the difference in NNTs. A  
24 mathematical modelling study from Australia found that a combination of screening and subsequent  
25 treatment of all LTBI positive immigrants would result in an overall reduction in number of TB cases of  
26 about one-third to one-half from 2013 - 2050.<sup>12</sup> The NNSs were 297 for all immigrants and 136 for  
27 immigrants originating from countries with an estimated TB IR >100/100 000, which is somewhat lower  
28 than in the current study. As in the UK study the model was based on permanent arrivals.  
29  
30  
31  
32  
33

### 34 35 **Challenges of NNS/NNT estimation in immigrant screening**

36 The lifetime age-weighted risk of TB following infection in settings with low exogenous re-infection is  
37 estimated to be 12%.<sup>15</sup> The reported low pooled positive predictive value of the IGRA (2.7%) corresponds  
38 to an NNT of 37 across different settings and populations.<sup>16</sup> This corresponds to 111 months of  
39 treatment to prevent one TB case in need of 6 months of treatment. Thus, the risk reduction following  
40 LTBI treatment must be large to reduce the NNT. Although morbidity, mortality, and transmission can be  
41 avoided if TB is prevented, the benefit of LTBI treatment for the individual should outweigh the risk of  
42 severe adverse effects. Although LTBI treatment is safe overall, it carries a risk of severe and potentially  
43 life-threatening toxic adverse effects.<sup>17</sup>  
44

45 Register data did not allow us to clearly distinguish co-prevalent TB from TB that developed later  
46 and was potentially preventable through LTBI management (incident TB). LTBI is considered to comprise  
47 a spectrum of infection states.<sup>18</sup> A prolonged asymptomatic phase of early subclinical TB may precede  
48 clinical presentation with active disease.<sup>19 20</sup> A pre- and post-arrival evaluation of a cohort of US  
49 immigrants reported that >80% of TB cases diagnosed within 1 year of receiving pre-arrival examination  
50 represented co-prevalent TB.<sup>20</sup> TB diagnosed <1 month after arrival is clearly not preventable, whereas  
51 TB diagnosis within 1-6 months may or may not be preventable. Based on this uncertainty, we presented  
52 NNSs and NNTs separately for TB diagnosed >1 and >6 months after arrival.  
53  
54  
55  
56  
57  
58  
59  
60

1  
2  
3 Emigration was substantial in some groups. Immigrants to Norway from Myanmar were almost  
4 exclusively refugees under the United Nations High Commissioner for Refugees and were granted  
5 residency prior to arrival, whereas applications from adult asylum seekers from Afghanistan commonly  
6 were rejected. The observation years lost due to emigration were also substantial in other groups with  
7 high proportions of asylum seekers. Immigrants from the Philippines often arrive as au-pairs and are  
8 granted only 2-year work permits. Emigration may also lead to NNT overestimation if immigrants who  
9 show LTBI positivity on screening upon arrival in Norway develop TB after emigration.  
10  
11

### 12 **The effect of timeliness of screening and treatment**

13 In this study, less than one in five estimated LTBI-positive individuals (if all immigrants were screened)  
14 was treated. This gap in the *intention to screen is intention to treat* principle represents a challenge and  
15 has been reported in other Norwegian studies;<sup>21-23</sup> it has been due partly to Norwegian guidelines (in  
16 which the groups targeted for screening has been wider than those targeted for treatment), and  
17 measures have been taken to minimise it.<sup>7</sup> It may, however, also signal that the number of LTBI-positive  
18 individuals is too high for the health services to treat, and/or that clinicians are reluctant to initiate LTBI  
19 treatment in individuals with unknown risk of progression to disease.  
20  
21

22 As a high proportion of incident TB cases occur early after arrival, an important component to  
23 improve the impact of the screening programme would be to ensure expedited follow-up and LTBI  
24 treatment initiation. Increased attention is given to the need for timely interventions as the incubation  
25 period for TB.<sup>24</sup> The reduced risk of progression to TB over time will increase NNT estimates with time,  
26 and delayed follow-up represents missed opportunities. The potential for additional prevented cases  
27 varied across countries of origin. The high potential for additional prevention among immigrants from  
28 Vietnam reflects the high proportions of those who are ill early after arrival and those for whom LTBI  
29 treatment is initiated late, whereas the opposite was observed for India.  
30  
31

### 32 **Comparing NNT to TB NR in Norway and WHO estimated IRs in countries of origin**

33 We found a stronger numerical correlation between the NNT and TB NR in Norway than between the  
34 NNT and WHO-estimated IR in the country of origin for the top 10 source countries for TB in Norway.  
35 This is expected, as both the NRs and the NNT estimates are derived from the same Norwegian data  
36 (representing the same subset of the population who immigrated to Norway, which may not be a  
37 representative sample of the people in the country of origin), whereas the WHO-estimated IRs use  
38 country-specific data to make representative estimates for their national populations. When a large  
39 difference exists between the people in the country of origin and the subset of the population who  
40 immigrated to Norway, we would expect the TB NR in Norway to be more programmatically useful than  
41 the WHO estimated IRs in countries of origin.  
42  
43  
44  
45

### 46 **Public health implications**

47 The overall high NNTs and NNTs in this study call into question whether routine LTBI screening of  
48 immigrants in a high-income low-incidence country is feasible, safe and effective, without the application  
49 of additional selection criteria. Although LTBI management based on TB notification in Norway rather  
50 than WHO estimated IRs in countries of origin, would have improved the targeting of immigrants, the  
51 NNTs and NNTs remained high.  
52  
53

54 The estimated number of incident TB cases prevented by LTBI treatment was modest suggesting  
55 that substantial scale-up of the LTBI care cascade is necessary to strengthen the public health impact.  
56  
57  
58  
59  
60

1  
2  
3 Until new tests with higher predictive values for TB are available,<sup>23</sup> there are two complementary  
4 approaches to reduce the NNSs and NNTs. Firstly, screening could be limited to immigrants with  
5 additional risk factors for disease, such as young age, recent known contact, abnormal x-ray findings, and  
6 immunosuppressive conditions. This approach, however, will require additional resources to correctly  
7 identify risk groups on entry. Secondly, the LTBI care cascade could be improved so that further  
8 examinations and treatment are offered sooner following a positive LTBI screening test. The programme  
9 has the potential to prevent additional TB cases if more immigrants with LTBI are offered treatment, and  
10 this treatment starts sooner after arrival. TB disease develops usually 3-9 months after exposure and  
11 rarely more than two years after exposure,<sup>24</sup> which strengthens the recommendation for prompt follow-  
12 up of immigrant screening. A combination of these two approaches seems most plausible. Cost-  
13 effectiveness studies could help to identify the most beneficial approach in a Norwegian setting.

14  
15  
16 Monitoring of the effectiveness of screening should urgently be improved, by targeting  
17 immigrants with risk factors in addition to the TB IR in the source country and ensuring timely follow-up  
18 of screening. The data in Norway are better than in many other countries, but still with wide uncertainty.  
19 As immigration trends and composition and health services vary considerably among countries, better  
20 monitoring and evaluation of current screening programmes are needed so that countries can adjust  
21 their policies based on the yield of screening.

22  
23  
24 Even when applying the most optimistic estimates regarding diagnostic test sensitivity,  
25 treatment efficacy, and adherence to treatment, a substantial proportion of incident TB cases will not be  
26 prevented through LTBI screening and management. Easy and equitable access to health care services  
27 for all should remain a cornerstone of tuberculosis control and prevention so that clinical cases are  
28 detected and treated early.

### 30 31 **Ethical approval**

32 Ethical approval of the study was obtained from Regional Committee for Medical and Health Research  
33 Ethics, south east Norway (2017/164).

### 34 35 36 **Funding statement**

37 The Norwegian Health Association funded this study. Brita Askeland Winje was funded by the Norwegian  
38 Health Association

### 39 40 41 **Competing interests statement**

42 None declared.

### 43 44 45 **Authors' contributions**

46 BAW initiated the study, and BAW and EH wrote the protocol. BAW, RW, and GMG were responsible for  
47 modelling and analyses; BAW, RW and EH drafted the manuscript; and BAW, PA, PAA, EH, RW, and GMG  
48 provided input to discussions. All authors have read and approved the final version of the manuscript.

### 49 50 51 **Data sharing statement**

52 Study data are available from the corresponding author on reasonable request

1  
2  
3 **Figure legends**  
4

5 **Figure 1** Reasons for immigration for immigrants aged < 35 years arriving in Norway in 2008-2011, by  
6 country of origin (%).  
7  
8  
9  
10  
11  
12  
13  
14  
15  
16  
17  
18  
19  
20  
21  
22  
23  
24  
25  
26  
27  
28  
29  
30  
31  
32  
33  
34  
35  
36  
37  
38  
39  
40  
41  
42  
43  
44  
45  
46  
47  
48  
49  
50  
51  
52  
53  
54  
55  
56  
57  
58  
59  
60

For peer review only



## REFERENCES

1. WHO. Guidelines for the management of latent tuberculosis infection Geneva2014 [cited 2014 28.10.2014]. Available from: [http://www.who.int/tb/publications/ltbi\\_document\\_page/en/](http://www.who.int/tb/publications/ltbi_document_page/en/).
2. WHO. Latent TB Infection: Updated and consolidated guidelines for programmatic management. 2018;WHO/CDS/TB/2018.4:74. doi: <http://www.who.int/tb/publications/2018/latent-tuberculosis-infection/en/>
3. Kunst H, Burman M, Arnesen TM, et al. Tuberculosis and latent tuberculous infection screening of migrants in Europe: comparative analysis of policies, surveillance systems and results. *The international journal of tuberculosis and lung disease : the official journal of the International Union against Tuberculosis and Lung Disease* 2017;21(8):840-51.
4. Kruijshaar ME, Abubakar I, Stagg HR, et al. Migration and tuberculosis in the UK: targeting screening for latent infection to those at greatest risk of disease. *Thorax* 2013;68(12):1172-4.
5. Arnesen TM, Heldal E, Mengshoel AT, et al. Tuberkulose i Norge i 2016 med behandlingsresultater for 2015. In: Folkehelseinstituttet, ed. Oslo, 2017.
6. WHO. Global tuberculosis report. Geneva, Switzerland, 2014.
7. Folkehelseinstituttet. Guidelines for prevention and control of tuberculosis Oslo: Norwegian Institute of Public Health; 2016 [Available from: <https://www.fhi.no/nettpub/tuberkuloseveilederen/> accessed 23.06.2017].
8. Winje BA, Oftung F, Korsvold GE, et al. Screening for tuberculosis infection among newly arrived asylum seekers: comparison of QuantiFERONTB Gold with tuberculin skin test. *BMC Infect Dis* 2008;8:65.
9. Pareek M, Bond M, Shorey J, et al. Community-based evaluation of immigrant tuberculosis screening using interferon gamma release assays and tuberculin skin testing: observational study and economic analysis. *Thorax* 2013;68(3):230-9.
10. Pareek M, Watson JP, Ormerod LP, et al. Screening of immigrants in the UK for imported latent tuberculosis: a multicentre cohort study and cost-effectiveness analysis. *The Lancet infectious diseases* 2011;11(6):435-44.
11. Laupacis A, Sackett DL, Roberts RS. An assessment of clinically useful measures of the consequences of treatment. *N Engl J Med* 1988;318(26):1728-33.
12. Denholm JT, McBryde ES. Can Australia eliminate TB? Modelling immigration strategies for reaching MDG targets in a low-transmission setting. *Aust N Z J Public Health* 2014;38(1):78-82.
13. Borgdorff MW, Sebek M, Gekus RB, et al. The incubation period distribution of tuberculosis estimated with a molecular epidemiological approach. *Int J Epidemiol* 2011;40(4):964-70.
14. Kirby T. Tuberculosis rates unacceptably high in UK cities. *The Lancet infectious diseases* 2013;13(10):836-7.
15. Vynnycky E, Fine PE. The natural history of tuberculosis: the implications of age-dependent risks of disease and the role of reinfection. *Epidemiol Infect* 1997;119(2):183-201.
16. Diel R, Loddenkemper R, Nienhaus A. Predictive value of interferon-gamma release assays and tuberculin skin testing for progression from latent TB infection to disease state: a meta-analysis. *Chest* 2012;142(1):63-75.
17. Kunst H, Khan KS. Age-related risk of hepatotoxicity in the treatment of latent tuberculosis infection: a systematic review. *International Journal of Tuberculosis & Lung Disease* 2010;14(11):1374-81.
18. Esmail H, Barry CE, 3rd, Young DB, et al. The ongoing challenge of latent tuberculosis. *Philos Trans R Soc Lond B Biol Sci* 2014;369(1645):20130437. doi: 10.1098/rstb.2013.0437
19. Dheda K, Barry CE, 3rd, Maartens G. Tuberculosis. *Lancet* 2016;387(10024):1211-26.
20. Walter ND, Painter J, Parker M, et al. Persistent latent tuberculosis reactivation risk in United States immigrants. *American journal of respiratory and critical care medicine* 2014;189(1):88-95.

- 1
- 2
- 3 21. Harstad I, Jacobsen GW. Poor follow-up after screening for tuberculosis. *TidsskrNor Laegeforen*
- 4 2012;132(1):14-16.
- 5 22. Harstad I, Jacobsen GW, Heldal E, et al. The role of entry screening in case finding of tuberculosis
- 6 among asylum seekers in Norway. *BMCPublic Health* 2010;10:670.
- 7 23. Winje BA, White R, Syre H, et al. Stratification by interferon-gamma release assay level predicts risk
- 8 of incident TB. *Thorax* 2018
- 9 24. Behr MA, Edelstein PH, Ramakrishnan L. Revisiting the timetable of tuberculosis. *BMJ*
- 10 2018;362:k2738.
- 11
- 12
- 13
- 14
- 15
- 16
- 17
- 18
- 19
- 20
- 21
- 22
- 23
- 24
- 25
- 26
- 27
- 28
- 29
- 30
- 31
- 32
- 33
- 34
- 35
- 36
- 37
- 38
- 39
- 40
- 41
- 42
- 43
- 44
- 45
- 46
- 47
- 48
- 49
- 50
- 51
- 52
- 53
- 54
- 55
- 56
- 57
- 58
- 59
- 60

For peer review only

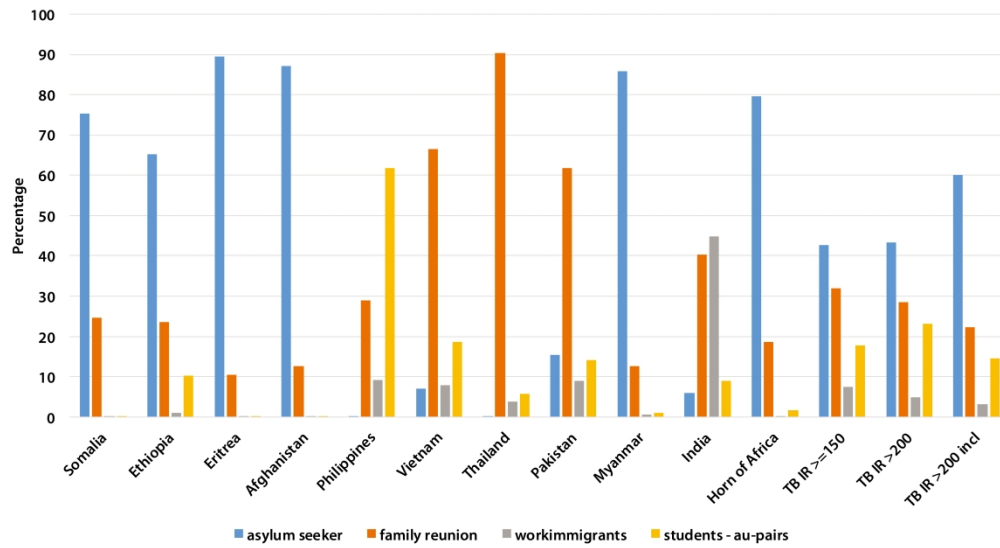

Figure 1 Reasons for immigration for immigrants aged < 35 years arriving in Norway in 2008-2011, by country of origin (%).

## Appendices 1a-d and 2

### Appendix 1a, Data sources and information provided

| Source                                                                         | Information provided                                                                                                                                                                                                                                                                                                                                                                                                                                                                                                                                                                                                                                                                                                                     |
|--------------------------------------------------------------------------------|------------------------------------------------------------------------------------------------------------------------------------------------------------------------------------------------------------------------------------------------------------------------------------------------------------------------------------------------------------------------------------------------------------------------------------------------------------------------------------------------------------------------------------------------------------------------------------------------------------------------------------------------------------------------------------------------------------------------------------------|
| <b>IMMIGRATION AND EMIGRATION DATA</b>                                         |                                                                                                                                                                                                                                                                                                                                                                                                                                                                                                                                                                                                                                                                                                                                          |
| Norwegian Directorate of Immigration (UDI) (aggregated data)                   | <b>Immigration:</b> Total number of asylum seekers applying for residence in Norway by country of citizenship and by year of application (2008-2014). Age-distribution was reported as proportions by country of citizenship<br><b>Emigration:</b> Data on the number of immigrants who later emigrated. Time before emigration were based on the number of days from date of application to date of final rejection of application by country of citizenship and by year. Data were obtained as percentiles, i.e. the number of days reported as the 10 <sup>th</sup> percentile reflected the number of days from date of application until date of final rejection for the ten percent with the shortest observation time, and so on. |
| Statistics Norway (SSB) (aggregated data)                                      | <b>Immigration:</b> Total number of given residence permits for students, work immigrants, au-pairs and family reunifications in Norway by country of birth and year (2008-2014). Age-distribution was reported by country of birth and reason for immigration (proportions)<br><b>Emigration:</b> Information on average time in Norway before emigration by reason for immigration and year. Estimates are based on data from 2014.                                                                                                                                                                                                                                                                                                    |
| <b>CASE DATA</b>                                                               |                                                                                                                                                                                                                                                                                                                                                                                                                                                                                                                                                                                                                                                                                                                                          |
| Norwegian Surveillance System for Infectious diseases (MSIS) (case-based data) | Persons notified with TB or preventive treatment of latent TB in Norway, 2008 – 2016: individual-level data including category (TB or LTBI preventive treatment), age, country of birth, date of notification, date of diagnosis (collection of clinical sample), date of start of treatment and time in Norway prior to date of diagnosis (categorized as <1 month, 1-6 months, 7-12 months, 1-2 years, 3-4 years, 5-9 years, and >10 years)                                                                                                                                                                                                                                                                                            |

### Appendix 1b, Definitions

| Definitions                                                            | Estimates                                                                                                                                                                                                                                                                                                                                                                                                                                               |
|------------------------------------------------------------------------|---------------------------------------------------------------------------------------------------------------------------------------------------------------------------------------------------------------------------------------------------------------------------------------------------------------------------------------------------------------------------------------------------------------------------------------------------------|
| Immigration and emigration                                             | We defined an immigrant as a person who applied for asylum or who received a residence permit (other immigrant groups). We defined emigration as having received a final rejection of application for asylum or being recorded as emigrated in SSB.                                                                                                                                                                                                     |
| Country of origin                                                      | This reflects citizenship for asylum seekers and country of birth for other immigrant groups.                                                                                                                                                                                                                                                                                                                                                           |
| Number immigrants arriving in 2008-2011 and who eligible for screening | We estimated the proportion aged <15 years and 15-35 years by country, reason for immigration and year of immigration based on the reported age-distribution from SSB/UDI. Refugees: 83% < 35 yrs. Among them 18% are 0-14 yrs and 82% 15-34 yrs<br>Family-reunification: 80% < 35 yrs, among them 44% are 0-14 yrs and 56% are 15-34 yrs. Work immigrants: 70%, among them all are 15-34 yrs. Students and au-pairs: 95%, among them all are 15-34 yrs |

1  
2  
3  
4  
5  
6  
7  
8  
9  
10  
11  
12  
13  
14  
15  
16  
17  
18  
19  
20  
21  
22  
23  
24  
25  
26  
27  
28  
29  
30  
31  
32  
33  
34  
35  
36  
37  
38  
39  
40  
41  
42  
43  
44  
45  
46

|                       |                                                                                                                                                                                                                                                                                                                                                                                                                                                                                                                                                                                                                                                   |
|-----------------------|---------------------------------------------------------------------------------------------------------------------------------------------------------------------------------------------------------------------------------------------------------------------------------------------------------------------------------------------------------------------------------------------------------------------------------------------------------------------------------------------------------------------------------------------------------------------------------------------------------------------------------------------------|
| LTBI                  | Latent tuberculosis infection. We used positive IGRA as a proxy for LTBI.                                                                                                                                                                                                                                                                                                                                                                                                                                                                                                                                                                         |
| Number of LTBI        | The prevalence of LTBI in the immigrant cohort was estimated by multiplying the number of arriving immigrants with the published estimates of IGRA positives, based on published literature, including a Norwegian publication. Estimates of IGRA positivity ranged from 18%-29%, depending on estimated TB incidence rate in country of origin and age-group; 0-14 yrs and 15-35yrs.                                                                                                                                                                                                                                                             |
| TB and LTBI treatment | We used the categorical information about time in Norway prior to diagnosis from MSIS to estimate a probability distribution for each case's arrival year in Norway. We then estimated the number of individuals with TB or LTBI treatment who belonged to the 2008-2011 cohort of immigrants by multiplying the number of cases by the probability that they immigrated to Norway in 2008-2011.                                                                                                                                                                                                                                                  |
| Preventable TB        | We defined preventable TB as a TB patient notified to MSIS with TB and who: (i) arrived to Norway in 2008-2011, (ii) was notified to MSIS > 1 month (6 months) and < 5 years after arrival, (iii) was younger than 40 years of age at notification (to allow for five years observation time after screening). We excluded TB cases that were on TB treatment on arrival to Norway. We then used this number and adjusted for QFT sensitivity 84% (81% -87%), treatment effectiveness at 65% (50%-80), and treatment completion rates at 90% (80% - 100%) to estimate the final number of preventable TB cases belonging to the 2008-2011 cohort. |

**Appendix 1c, Model assumptions**

|                                                                                                                                                                      |
|----------------------------------------------------------------------------------------------------------------------------------------------------------------------|
| That immigrants who received residence permit or applied for asylum actually immigrated to Norway.                                                                   |
| That immigrants that later were registered as emigrated, or had a final rejection of application for asylum, actually emigrated.                                     |
| That all immigrants eligible for screening were screened and that they were screened soon after arrival in line with regulations.                                    |
| That the age- and country specific prevalence of LTBI from published literature, including Norwegian data, is a fair proxy for the prevalence in the arrival cohort. |
| That a person did not leave Norway after receiving LTBI treatment.                                                                                                   |

**Appendix d, Indexes**

| Index                                                                  | Calculation                                                                                                                                      | The use of the indexes                                                               |
|------------------------------------------------------------------------|--------------------------------------------------------------------------------------------------------------------------------------------------|--------------------------------------------------------------------------------------|
| Duration of time spent in Norway (cumulative probability distribution) | Table Y1                                                                                                                                         | To estimate the number of people remaining in Norway in year X who arrived in year Y |
| Estimated people remaining in Norway in year X who arrived in year Y   | Number of arriving immigrants in year Y * proportion of immigrants who remain in Norway for at least (X-Y) years                                 | To calculate person years under observation for the cohort                           |
| Person years under observation for the cohort                          | Estimated number of years spent in Norway for immigrants who arrived in years 2008-2011                                                          | Used as the exposure time for the cohort                                             |
| Risk of preventable TB per time-period                                 | For each time period after arrival to Norway (<1 month, 1-6 months, 7-12 months, 1-2 years, 3-4 years, 5-9 years, and >10 years) we obtained the | Used to calculate the additional preventable TB (see description below)              |

|                                                   |                                                                                                                                                                                                                                                                                                                                    |                                                                                                 |
|---------------------------------------------------|------------------------------------------------------------------------------------------------------------------------------------------------------------------------------------------------------------------------------------------------------------------------------------------------------------------------------------|-------------------------------------------------------------------------------------------------|
|                                                   | number of preventable TB cases and then calculated the risk of preventable TB per time period (i.e. number of cases divided by number of people).                                                                                                                                                                                  |                                                                                                 |
| Monthly risk of preventable TB within time-period | $1-(1-\text{risk})^{(1/\text{numbermonths})}$ .                                                                                                                                                                                                                                                                                    | Used to calculate the 5 year risk of preventable TB without emigration                          |
| Number needed to screen (NNS)                     | Number of arriving immigrants/number of preventable TB                                                                                                                                                                                                                                                                             | Primary outcome                                                                                 |
| Crude number needed to treat (NNT)                | Number of LTBI positive immigrants/number of preventable TB (a combined effect of emigration and TB risk)                                                                                                                                                                                                                          | Primary outcome for immigrants without taking emigration into account.                          |
| Corrected number needed to treat (NNT)            | $1/\text{risk of preventable TB (TB risk corrected for the effect of emigration)}$                                                                                                                                                                                                                                                 | NNT measure that is independent of emigration                                                   |
| Number of TB prevented by LTBI treatment          | Number of LTBI treated*risk of preventable TB in the different time periods based on the first five years in Norway.<br><br>Calculations for time periods were based on LTBI positive individuals who remained at risk 1-6 months, 7-12 months, 13-36 months and 37-60 months after arrival to Norway.                             | Secondary outcome to estimate the number of TB prevented in Norway from the screening programme |
| Additional preventable TB                         | We calculated the percentage increase in prevented TB (potential for additional prevention) when LTBI treatment was initiated within the first (i) 6 months and (ii) 12 months after arrival to Norway (based on the 84% sensitivity/65% treatment effectiveness/90% adherence estimates and incident TB > 1 month after arrival). | Secondary outcome to estimate the effect of delay of LTBI treatment initiation                  |

1  
2  
3  
4  
5  
6  
7  
8  
9  
10  
11  
12  
13  
14  
15  
16  
17  
18  
19  
20  
21  
22  
23  
24  
25  
26  
27  
28  
29  
30  
31  
32  
33  
34  
35  
36  
37  
38  
39  
40  
41  
42  
43  
44  
45  
46

**Appendix 2. Number of notified TB cases from the top ten source countries for immigrant TB in Norway, 2008-2015 (Source: MSIS\*)**

| Countries   | 2008 | 2009 | 2010 | 2011 | 2012 | 2013 | 2014 | 2015 | Total |
|-------------|------|------|------|------|------|------|------|------|-------|
| Somalia     | 70   | 106  | 72   | 106  | 112  | 102  | 84   | 47   | 699   |
| Eritrea     | 12   | 24   | 16   | 20   | 23   | 41   | 47   | 49   | 232   |
| Philippines | 20   | 14   | 25   | 23   | 30   | 25   | 26   | 25   | 188   |
| Pakistan    | 20   | 18   | 23   | 20   | 15   | 18   | 15   | 8    | 137   |
| Ethiopia    | 9    | 27   | 17   | 14   | 15   | 16   | 17   | 15   | 130   |
| Afghanistan | 7    | 10   | 19   | 16   | 11   | 18   | 11   | 26   | 118   |
| Thailand    | 10   | 16   | 15   | 10   | 11   | 8    | 14   | 13   | 97    |
| Vietnam     | 10   | 15   | 12   | 11   | 7    | 15   | 12   | 7    | 89    |
| India       | 7    | 9    | 7    | 4    | 11   | 12   | 9    | 6    | 65    |
| Myanmar     | 11   | 6    | 10   | 8    | 7    | 7    | 3    | 2    | 54    |

\*MSIS, Norwegian Surveillance System for Infectious Diseases

STROBE Statement—Checklist of items that should be included in reports of *cohort studies*

|                              | Item No | Recommendation                                                                                                                                                                                                                                                                                                                                                                                                                                      |
|------------------------------|---------|-----------------------------------------------------------------------------------------------------------------------------------------------------------------------------------------------------------------------------------------------------------------------------------------------------------------------------------------------------------------------------------------------------------------------------------------------------|
| <b>Title and abstract</b>    | 1       | (a) Indicate the study's design with a commonly used term in the title or the abstract, <a href="#">page 1 title</a><br>(b) Provide in the abstract an informative and balanced summary of what was done and what was found, <a href="#">page 2</a>                                                                                                                                                                                                 |
| <b>Introduction</b>          |         |                                                                                                                                                                                                                                                                                                                                                                                                                                                     |
| Background/rationale         | 2       | Explain the scientific background and rationale for the investigation being reported, <a href="#">page 4</a>                                                                                                                                                                                                                                                                                                                                        |
| Objectives                   | 3       | State specific objectives, including any prespecified hypotheses, <a href="#">page 4</a>                                                                                                                                                                                                                                                                                                                                                            |
| <b>Methods</b>               |         |                                                                                                                                                                                                                                                                                                                                                                                                                                                     |
| Study design                 | 4       | Present key elements of study design early in the paper <a href="#">page 4</a>                                                                                                                                                                                                                                                                                                                                                                      |
| Setting                      | 5       | Describe the setting, locations, and relevant dates, including periods of recruitment, exposure, follow-up, and data collection , <a href="#">page 4 and 5</a>                                                                                                                                                                                                                                                                                      |
| Participants                 | 6       | (a) Give the eligibility criteria, and the sources and methods of selection of participants. Describe methods of follow-up <a href="#">page 4 and 5</a><br>(b) For matched studies, give matching criteria and number of exposed and unexposed <a href="#">na</a>                                                                                                                                                                                   |
| Variables                    | 7       | Clearly define all outcomes, exposures, predictors, potential confounders, and effect modifiers. Give diagnostic criteria, if applicable <a href="#">page 5-8, appendices 1a-d</a>                                                                                                                                                                                                                                                                  |
| Data sources/<br>measurement | 8*      | For each variable of interest, give sources of data and details of methods of assessment (measurement). Describe comparability of assessment methods if there is more than one group <a href="#">page 4 and 5, appendix 1a</a>                                                                                                                                                                                                                      |
| Bias                         | 9       | Describe any efforts to address potential sources of bias, <a href="#">page 6 and 7</a>                                                                                                                                                                                                                                                                                                                                                             |
| Study size                   | 10      | Explain how the study size was arrived at <a href="#">page 5</a>                                                                                                                                                                                                                                                                                                                                                                                    |
| Quantitative variables       | 11      | Explain how quantitative variables were handled in the analyses. If applicable, describe which groupings were chosen and why <a href="#">page 5-7</a>                                                                                                                                                                                                                                                                                               |
| Statistical methods          | 12      | (a) Describe all statistical methods, including those used to control for confounding <a href="#">page 5-7</a><br>(b) Describe any methods used to examine subgroups and interactions <a href="#">page 5-7</a><br>(c) Explain how missing data were addressed <a href="#">page 6</a><br>(d) If applicable, explain how loss to follow-up was addressed <a href="#">page 6</a><br>(e) Describe any sensitivity analyses <a href="#">page 6 and 7</a> |
| <b>Results</b>               |         |                                                                                                                                                                                                                                                                                                                                                                                                                                                     |
| Participants                 | 13*     | (a) Report numbers of individuals at each stage of study—eg numbers potentially eligible, examined for eligibility, confirmed eligible, included in the study, completing follow-up, and analysed <a href="#">page 6 and 7</a><br>(b) Give reasons for non-participation at each stage <a href="#">page 6</a><br>(c) Consider use of a flow diagram                                                                                                 |
| Descriptive data             | 14*     | (a) Give characteristics of study participants (eg demographic, clinical, social) and information on exposures and potential confounders <a href="#">table 2, page 10</a><br>(b) Indicate number of participants with missing data for each variable of interest, <a href="#">na (model)</a><br>(c) Summarise follow-up time (eg, average and total amount) <a href="#">table 2, page 10</a>                                                        |
| Outcome data                 | 15*     | Report numbers of outcome events or summary measures over time <a href="#">table 3 and 4, page 11 and 12</a>                                                                                                                                                                                                                                                                                                                                        |
| Main results                 | 16      | (a) Give unadjusted estimates and, if applicable, confounder-adjusted estimates and                                                                                                                                                                                                                                                                                                                                                                 |



|                          |    |                                                                                                                                                                                                           |
|--------------------------|----|-----------------------------------------------------------------------------------------------------------------------------------------------------------------------------------------------------------|
|                          |    | their precision (eg, 95% confidence interval). Make clear which confounders were adjusted for and why they were included <a href="#">table 3, page 11</a>                                                 |
|                          |    | (b) Report category boundaries when continuous variables were categorized <a href="#">na</a>                                                                                                              |
|                          |    | (c) If relevant, consider translating estimates of relative risk into absolute risk for a meaningful time period <a href="#">na</a>                                                                       |
| Other analyses           | 17 | Report other analyses done—eg analyses of subgroups and interactions, and sensitivity analyses <a href="#">table 4, page 12</a>                                                                           |
| <b>Discussion</b>        |    |                                                                                                                                                                                                           |
| Key results              | 18 | Summarise key results with reference to study objectives <a href="#">page 13</a>                                                                                                                          |
| Limitations              | 19 | Discuss limitations of the study, taking into account sources of potential bias or imprecision. Discuss both direction and magnitude of any potential bias <a href="#">page 13</a>                        |
| Interpretation           | 20 | Give a cautious overall interpretation of results considering objectives, limitations, multiplicity of analyses, results from similar studies, and other relevant evidence <a href="#">page 15 and 16</a> |
| Generalisability         | 21 | Discuss the generalisability (external validity) of the study results <a href="#">page 16</a>                                                                                                             |
| <b>Other information</b> |    |                                                                                                                                                                                                           |
| Funding                  | 22 | Give the source of funding and the role of the funders for the present study and, if applicable, for the original study on which the present article is based <a href="#">page 16</a>                     |

\*Give information separately for exposed and unexposed groups.

**Note:** An Explanation and Elaboration article discusses each checklist item and gives methodological background and published examples of transparent reporting. The STROBE checklist is best used in conjunction with this article (freely available on the Web sites of PLoS Medicine at <http://www.plosmedicine.org/>, Annals of Internal Medicine at <http://www.annals.org/>, and Epidemiology at <http://www.epidem.com/>). Information on the STROBE Initiative is available at <http://www.strobe-statement.org>.

# BMJ Open

## Immigrant screening for latent tuberculosis infection – numbers needed to test and treat: A Norwegian population-based cohort study

|                                 |                                                                                                                                                                                                                                                                                                                                                                                                                                                                                                                                                                                                                                                                                      |
|---------------------------------|--------------------------------------------------------------------------------------------------------------------------------------------------------------------------------------------------------------------------------------------------------------------------------------------------------------------------------------------------------------------------------------------------------------------------------------------------------------------------------------------------------------------------------------------------------------------------------------------------------------------------------------------------------------------------------------|
| Journal:                        | <i>BMJ Open</i>                                                                                                                                                                                                                                                                                                                                                                                                                                                                                                                                                                                                                                                                      |
| Manuscript ID                   | bmjopen-2018-023412.R2                                                                                                                                                                                                                                                                                                                                                                                                                                                                                                                                                                                                                                                               |
| Article Type:                   | Research                                                                                                                                                                                                                                                                                                                                                                                                                                                                                                                                                                                                                                                                             |
| Date Submitted by the Author:   | 05-Nov-2018                                                                                                                                                                                                                                                                                                                                                                                                                                                                                                                                                                                                                                                                          |
| Complete List of Authors:       | Winje, Brita; Norwegian Institute of Public Health, Department of vaccine preventable diseases<br>Groneng, Gry ; Norwegian Institute of Public Health, Department of Infectious Disease Epidemiology and Modelling<br>White, Richard; Norwegian Institute of Public Health, Department of Infectious Disease Epidemiology and Modelling<br>Akre, Peter ; Norwegian Directorate of Immigration, Statistics and Analysis Division<br>Aavitsland, Preben; Norwegian Institute of Public Health; University of Oslo, Institute of Health and Society<br>Heldal, Einar; Norwegian Institute of Public Health, Department of Tuberculosis, Blood-Borne and Sexually Transmitted Infections |
| <b>Primary Subject Heading</b>: | Infectious diseases                                                                                                                                                                                                                                                                                                                                                                                                                                                                                                                                                                                                                                                                  |
| Secondary Subject Heading:      | Public health                                                                                                                                                                                                                                                                                                                                                                                                                                                                                                                                                                                                                                                                        |
| Keywords:                       | Tuberculosis < INFECTIOUS DISEASES, Latent tuberculosis infection, Screening, Number needed to treat, Preventive treatment                                                                                                                                                                                                                                                                                                                                                                                                                                                                                                                                                           |
|                                 |                                                                                                                                                                                                                                                                                                                                                                                                                                                                                                                                                                                                                                                                                      |

SCHOLARONE™  
Manuscripts

# Immigrant screening for latent tuberculosis infection – numbers needed to test and treat: A Norwegian population-based cohort study

\***Brita Askeland Winje**, Department of Vaccine-Preventable Diseases, Norwegian Institute of Public Health, Oslo, Norway. E-mail: [brita.winje@fhi.no](mailto:brita.winje@fhi.no)

**Gry Marysol Grøneng**, Department of Infectious Disease Epidemiology and Modelling, Norwegian Institute of Public Health, Oslo, Norway. E-mail: [GryMarysol.Groneng@fhi.no](mailto:GryMarysol.Groneng@fhi.no)

**Richard White** Department of Infectious Disease Epidemiology and Modelling, Norwegian Institute of Public Health, Oslo, Norway. E-mail: [Richard.White@fhi.no](mailto:Richard.White@fhi.no)

**Peter Akre**, Statistics and Analysis Division, Norwegian Directorate of Immigration, Oslo, Norway. E-mail: [paj@udi.no](mailto:paj@udi.no)

**Preben Aavitsland**, Norwegian Institute of Public Health, Oslo, and Institute of Health and Society, University of Oslo, Norway. E-mail: [preben.aavitsland@fhi.no](mailto:preben.aavitsland@fhi.no)

**Einar Heldal**, Department of Tuberculosis, Blood-Borne and Sexually Transmitted Infections, Norwegian Institute of Public Health, Oslo, Norway. E-mail: [einari.heldal@fhi.no](mailto:einari.heldal@fhi.no)

\*Corresponding author

Word count: 4900 words

Key words: tuberculosis, latent tuberculosis infection, screening, preventive treatment, number needed to test, number needed to treat

1  
2  
3  
4  
5  
6  
7  
8  
9  
10  
11  
12  
13  
14  
15  
16  
17  
18  
19  
20  
21  
22  
23  
24  
25  
26  
27  
28  
29  
30  
31  
32  
33  
34  
35  
36  
37  
38  
39  
40  
41  
42  
43  
44  
45  
46  
47  
48  
49  
50  
51  
52  
53  
54  
55  
56  
57  
58  
59  
60

For peer review only

**ABSTRACT**

**Objectives** Estimate the numbers needed to screen (NNS) and treat (NNT) to prevent one tuberculosis (TB) case in the Norwegian immigrant LTBI screening programme, and to explore the effect of delay of LTBI treatment initiation.

**Design** Population-based prospective cohort study

**Participants** Immigrants to Norway

**Outcome** Incident TB

**Methods** We obtained aggregated data on immigration to Norway in 2008-2011 and used data from the Norwegian Surveillance System for Infectious Diseases to assess the number of TB cases arising in this cohort within 5 years after arrival. We calculated average NNSs and NNTs for immigrants from the top 10 source countries for TB in Norway and by estimated TB incidence rates (IRs) in source countries. We explored the sensitivity of these estimates regarding test performance, treatment efficacy, and treatment adherence using an extreme value approach, and assessed the effects of emigration, time to TB diagnosis (to define incident TB), and intervention timing.

**Results**

NNSs and NNTs were overall high, with substantial variation. The NNT showed numerically stronger negative correlation with the TB notification rate in Norway [-0.75 (95% CI 1.00 to -0.44)] than with the World Health Organisation IR [-0.32 (95% CI -0.93 to 0.29)]. NNTs were affected substantially by emigration and the definition of incident TB. Estimates were lowest for Somali [NNS 99 (70-150), NNT 27 (19-41)] and highest for Thai immigrants [NNS 585 (413-887), NNT 117 (83-178)]. Implementing LTBI treatment in immigrants sooner after arrival may improve the effectiveness of the programme.

**Conclusions**

Using TB notifications in Norway, rather than IR in source countries, would improve targeting of immigrants for LTBI management. However, the overall high NNT is a concern and challenges the scale-up of preventive LTBI treatment for significant public-health impact. Better data are urgently needed to monitor and evaluate NNS and NNT in countries implementing LTBI screening.

### Strengths and limitations of this study

- A population-based and sensitive surveillance system provided national data on all new cases of tuberculosis
- Country-specific administrative data were used to estimate person-time under observation for immigrants
- We applied different estimates of latent TB test sensitivity, treatment efficacy and adherence to treatment to calculate uncertainty
- The prevalence of latent tuberculosis infection in recent immigrants was estimated from published surveys rather than individual data
- Some cases of tuberculosis present upon arrival may have been misclassified as having onset after arrival

## BACKGROUND

The World Health Organisation (WHO) have issued guidelines for the programmatic management of latent tuberculosis infection (LTBI).<sup>1,2</sup> The guidelines strongly recommend screening for and treatment of LTBI in groups at high-risk for tuberculosis (TB) and conditionally in recent immigrants from high- to low TB incidence countries.<sup>1</sup> LTBI is common and the risk of progression to TB varies substantially among individuals, assumed to reflect age, time since infection, and host immune status.<sup>1</sup>

The identification of target immigrant groups for LTBI management remains challenging in most low-TB incidence settings. There has been a call for the harmonisation of migrant screening policies across Europe.<sup>3</sup> Eligibility for screening is commonly based on the TB IR in the country of origin or the reason for immigration, with typical focus on asylum seekers and refugees.<sup>3</sup> It has, however, been suggested that the targeting of immigrants based on the TB IR in the host country may improve the effectiveness of immigrant screening programmes.<sup>4</sup>

In Norway, foreign-born individuals account for almost 90% of TB notifications and the majority are diagnosed in the first 5 years after arrival.<sup>5</sup> Based on molecular surveillance of *Mycobacterium tuberculosis* strains, the majority of TB in the foreign-born population is assumed to reflect reactivation of LTBI acquired prior to arrival.<sup>5</sup> Against this backdrop, Norway has a well-established immigrant screening programme for TB and LTBI. Immigrants are currently targeted for TB screening based on the WHO-estimated TB incidence rates (IRs) in their countries of birth.<sup>6</sup> Immigrants younger than 35 years are also targeted for LTBI management to prevent future development of TB. The eligibility for arrival LTBI screening has differed over time; in March 2017 the IR cut-off value was changed from >40/100,000 to >200/100,000 (including immigrants from Afghanistan and Eritrea).<sup>7</sup> The monitoring and evaluation system of the long-standing TB and LTBI screening programme is weak.

The primary objective of this study was to use aggregated numbers of Norwegian immigration and individual level TB surveillance data to estimate the of number needed to screen (NNS) and number needed to treat (NNT) with LTBI chemoprophylaxis to prevent one TB case in the immigrant LTBI screening programme. Secondary objectives were to estimate the number of TB cases prevented by the current strategy in a 4-year cohort of immigrants, and to explore the effect of delay of LTBI treatment initiation within the first 6 months versus the 12 months after arrival, using the same immigration and surveillance data.

## METHODS

### Data sources and creation of data set for modelling and analysis

We combined aggregate numbers from Norwegian immigration data (i.e. information on the entire cohort) and individual level TB surveillance data (i.e. information on individuals with TB or LTBI treatment) to create a unified dataset for modelling and analysis. All steps are described in the text below. A complete overview is also presented in table format in appendices 1a-d.

### Data and sources

#### *Immigration and emigration data*

We have used administrative data on immigration by year, country of origin, and reason for immigration in Norway in 2008-2011. Data were obtained separately from two different sources: the Norwegian Directorate of Immigration (UDI) for newly arrived asylum seekers and from Statistics Norway (SSB) for other immigrant groups. The number of immigrants is based on number of asylum applications and number of residence permits for other immigrant groups. Country of origin reflects

1  
2  
3 citizenship for asylum seekers and country of birth for other immigrant groups. We estimated the  
4 proportion aged <15 years and 15-35 years by country, reason for immigration and year of  
5 immigration based on the reported age-distribution from SSB/UDI (appendix 1a). As emigration from  
6 Norway is substantial in some immigrant groups, we obtained aggregated administrative data on  
7 time spent in Norway before emigration from the same sources (further described below). In the  
8 model, we have assumed that immigrants who received residence permit or applied for asylum  
9 actually immigrated to Norway and that immigrants who were later registered as emigrated, or had a  
10 final rejection of application for asylum, actually emigrated (appendix 1c).

#### 11 12 13 *TB cases and LTBI treatment*

14 For individuals with TB and LTBI treatment (i.e. the people of interest), individual-level demographic  
15 and clinical information was obtained from the Norwegian Surveillance System for Infectious  
16 Diseases (MSIS) for the years 2008-2016. This time-period allows for five years observation time for  
17 all immigrants. The information included age at notification, country of birth, date of notification,  
18 date of diagnosis (collection of clinical sample) and date of start of treatment. Further, on the MSIS  
19 notification form, clinicians report time in Norway prior to diagnosis for foreign-born individuals  
20 using the following categories: <1 month, 1-6 months, 7-12 months, 1-2 years, 3-4 years, 5-9 years,  
21 and >10 years. Date of arrival is not reported.

22 It is mandatory for laboratories and clinicians to report TB diagnosis and treatment outcome,  
23 and prescription of LTBI treatment, to MSIS. Untreated LTBI is not reported. The sensitivity of MSIS  
24 data is assumed to be high because notifications are sent from multiple sources and are checked  
25 routinely against TB drug prescriptions.

26 We used all TB notifications to MSIS in 2008-2015 (year of reporting) to identify the top 10  
27 source countries (in absolute numbers; appendix 2) for immigrant TB in Norway and then calculated  
28 the TB notification rate (NR) in Norway based on the number of observation years.

#### 29 30 31 **Construction of analysis dataset**

32 Based on the aggregated immigration data we calculated the number of arriving immigrants aged  $\leq$   
33 35 years from the top 10 source countries for TB in Norway and for countries with WHO-estimated  
34 TB IRs > 150/100,000 population in the period 2008-2011. We used the WHO Global TB Report 2014  
35 estimates of TB IR in countries of origin in 2013.<sup>6</sup>

#### 36 37 38 *Estimated prevalence of LTBI*

39 We used a positive IGRA as a proxy for LTBI. The prevalence of IGRA positives was based on  
40 published literature, including Norwegian data on asylum seekers,<sup>8</sup> and ranged from 18% to 29%,  
41 depending on the WHO-estimated TB IR in the country of origin and the age group; 0-14 years and  
42 15-35 years.<sup>8-10</sup> The number of immigrants with LTBI in the model was estimated by multiplying the  
43 number of arriving immigrants with the published estimates of IGRA positives, separately for the  
44 two age-groups. In the model we have assumed that the age- and country specific prevalence of LTBI  
45 from published literature, including Norwegian data, is a fair proxy for the LTBI prevalence in the  
46 arrival cohort.

#### 47 48 49 *TB and LTBI treatments in the 2008-2011 immigrant cohort*

50 We used the categorical information about time in Norway prior to diagnosis from MSIS to estimate  
51 a probability distribution for each case's arrival year in Norway (e.g. "a case received a diagnosis in  
52 December 2010 and has been in Norway for <1 month, therefore they have 100% probability that  
53 they arrived in Norway in 2010 and belong to the 2008-2011 immigrant cohort", "a case received a  
54 diagnosis in March 2012 and has been in Norway for 1-6 months, therefore they have a 50%



probability that they arrived in Norway in 2011, and 50% probability that they arrived in Norway in 2012"). When information about time since arrival was missing, we imputed this information by applying the country-specific probability distribution for time-in-Norway. We then estimated the number of individuals with TB or LTBI treatment who belonged to the 2008-2011 cohort of immigrants by multiplying the number of cases by the probability that they immigrated to Norway in 2008-2011.

We excluded individuals who were diagnosed with TB (based on the date of sample collection for TB diagnosis) within 1 month after arrival, as these individuals were most likely ill on arrival (co-prevalent TB) and TB would not be preventable through LTBI screening and treatment. For sensitivity analysis, we also excluded individuals who were notified within 1-6 months. These cases may or may not have been preventable through LTBI management. Based on this uncertainty, we present NNSs and NNTs separately for TB diagnosed >1 and >6 months after arrival, and applied these two definitions of incident TB throughout the study.

#### *Estimation of time in Norway*

Since emigration is substantial in some immigrant groups, we estimated the cumulative probability of time under observation in Norway based on UDI/SSB administrative data. For asylum seekers, data on emigration was obtained as percentile distributions of number of days from application date to date of final rejection of application, e.g. among 421 asylum seekers from Somalia who arrived in Norway in 2008 and whose application for asylum later was rejected, 10% were rejected within 62 days, 20% were rejected within 87 days and so on up until the 90% percentile. We used this information to calculate the number of person-years of observation lost due to emigration within the first five years after arrival in Norway. This was done separately by country, TB IR in country of citizenship and by year.

For other immigrant groups, data on emigration was based on aggregated September 2014 data, containing the number of immigrants per year and the number of them that emigrated before September 2014 (separately by reason for immigration). See Table 1 for an example of the data and the formulae used to estimate the cumulative probability distribution for duration of time in Norway for the cohort.

Table 1. The cumulative probability distribution for duration of time in Norway for immigrants other than asylum seekers.

| <b>Year of arrival (X)</b> | <b>Number arrived in year X</b> | <b>Number emigrated before 09/2014</b> | <b>Average time in Norway as of 09/2014</b> | <b>cumulative proportion staying in Norway as of 09/2014</b> |
|----------------------------|---------------------------------|----------------------------------------|---------------------------------------------|--------------------------------------------------------------|
| 2008                       | D1                              | N1                                     | 6,25                                        | 1-N1/D1                                                      |
| 2009                       | D2                              | N2                                     | 5,25                                        | 1-N2/D2                                                      |
| 2010                       | D3                              | N3                                     | 4,25                                        | 1-N3/D3                                                      |
| 2011                       | D4                              | N4                                     | 3,25                                        | 1-N4/D4                                                      |

#### *Finalizing dataset*

Using the prior pieces of information (number of people arriving each year, probability distribution of time to emigration, and for each TB/LTBI diagnosis – time since immigration and estimated year of arrival) we created a dataset containing yearly cohorts of people who immigrated to Norway between 2008 and 2011 and are followed up for either five years or until they emigrate from Norway (the shorter of the two).

## Outcomes

### *Preventable TB/Risk of preventable TB*

We defined preventable TB as a patient notified with TB to MSIS and who: (i) arrived to Norway in 2008-2011, (ii) was notified to MSIS > 1 month (6 months) and < 5 years after arrival, (iii) was younger than 40 years of age at notification (to allow for five years observation time after screening). With this relatively short time period, we assume that they were infected prior to arrival in Norway. We explored the sensitivity of these estimates regarding test performance, treatment efficacy and adherence to treatment using an extreme value approach. IGRA sensitivity was estimated to be 84% (with 81% and 87% applied as extreme values)<sup>11 12</sup> and chemoprophylaxis efficacy was estimated to be 65% (50%-80%),<sup>1 13</sup> consistent with a UK study.<sup>4</sup> The rate of treatment adherence was estimated to be 90% (80%-100%), based on previous studies, including Norwegian data.<sup>14-17</sup> The number of incident TB cases was adjusted accordingly and defined as preventable TB (table 2). We excluded TB cases that were on TB treatment on arrival to Norway.

For each time period after arrival to Norway (<1 month, 1-6 months, 7-12 months, 1-2 years, 3-4 years, 5-9 years, and >10 years) we obtained the number of preventable TB cases and then calculated the risk of preventable TB per time period (i.e. number of cases divided by number of people). The risk of developing TB during this time period was then also converted into monthly risk using the formula  $1-(1-\text{totalrisk})^{(1/\text{number-months})}$ .

### *NNS and NNT*

We estimated the NNS to prevent one incident TB case by calculating the ratio of the number of arriving immigrants to the number of preventable TB cases observed in Norway within 5 years. We used the extreme value approach to explore the sensitivity of these estimates.

We estimated the *crude NNT* as the ratio of the number of individuals testing positive for LTBI to the number of preventable TB cases. This NNT can be interpreted as a combined effect of emigration and TB risk (i.e. if someone emigrates from Norway they cannot receive a TB diagnosis in Norway, thus the more emigration the lower the risk for TB observed in Norway). We used the information on person years lost for observation due to emigration to calculate *corrected NNT* as  $1/(\text{risk of preventable TB in 5 years})$ . This number can be interpreted as the NNT if all immigrants remained in Norway for 5 years.

We then explored correlation with 95% confidence intervals (CIs) of the NNT with the TB NR in Norway and WHO-estimated TB IR. The purpose of this analysis was to identify which data source (TB NR in Norway or WHO-estimated TB IR) had a stronger association with public health implications in Norway (NNT).

### *Prevented TB due to LTBI treatment and the effect delay of LTBI treatment initiation*

We estimated the expected number of TB prevented by the LTBI treatments provided during the study period. This was calculated by multiplying the number of LTBI treatments by the subsequent risk of preventable TB in different time-periods (based on the categorical MSIS data on time since arrival). The calculations were limited to the first 5 years in Norway (e.g. if a person received LTBI treatment after 4 years in Norway, LTBI treatment would have a preventive effect for only 1 year). In the model, we have assumed that all immigrants eligible for screening actually were screened and that they were screened soon after arrival in line with the mandatory screening programme. We further assumed that a person did not leave Norway after receiving LTBI treatment. Calculations were based on incident TB > 1 month after arrival.

We calculated the percentage increase in prevented TB (potential for additional prevention) when LTBI treatment was initiated within the first (i) 6 months and (ii) 12 months after arrival to Norway (based on the 84% sensitivity/65% treatment effectiveness/90% adherence estimates and

1  
2  
3 incident TB > 1 month after arrival) through multiplying increased number of people screened by  
4 sensitivity by effectiveness by adherence. The outcome reflects a combination of the timing of TB  
5 diagnosis and LTBI treatment, or a strong effect of one of them.  
6  
7

### 8 **Uncertainty in the calculations**

9 None of the calculations in this study included uncertainty. Our model was primarily deterministic.  
10 The source of uncertainty in our study came from running our deterministic model with alternative  
11 IGRA sensitivities and treatment efficacies (the extreme value approach).  
12  
13

### 14 **Patient and Public Involvement**

15 Patients and or the public were not involved in the study  
16  
17

## 18 **RESULTS**

19 The majority of foreign-born TB patients in Norway originated from the Horn of Africa; Somalia alone  
20 accounted for 44% of TB cases from the top 10 source countries (table 2). Overall, a high proportion  
21 of TB occurred within the first year after arrival, with some variation among source countries. The  
22 fraction of observation years lost due to emigration was substantial in some groups and varied  
23 among source countries (table 2).  
24

25 Most immigrants from the Horn of Africa, Afghanistan, and Myanmar arrived as refugees and  
26 asylum seekers (figure 1). Most immigrants from Vietnam, Thailand, and Pakistan arrived for family  
27 reunification, whereas immigrants from India arrived for family reunification and work, and the  
28 majority of immigrants from the Philippines came to work as au-pairs.  
29  
30

31 > Insert figure 1 about here <  
32  
33

34 Overall, estimated NNSs and NNTs were high (table 3). Estimates were lowest for Somalia: screening  
35 of 70-150 and treatment of 19-41 Somali immigrants was required to prevent one incident TB case (6  
36 months threshold for preventable TB). NNTs were lowest for estimates corrected for the effect of  
37 emigration and with the 1-month threshold to define incident TB, compared to the crude NNT and  
38 the 6 months threshold (table 3). The same pattern was seen for all countries. NNTs were highest for  
39 immigrants from Pakistan and Thailand, although NNSs were substantially higher for Thailand. For  
40 most source countries, the number of preventable TB cases was reduced by one-third when the 6-  
41 month definition of incident TB was applied compared with the 1-month definition, but with  
42 variation (range 16%-75%).  
43

44 We found a stronger numerical correlation between the TB NR in Norway and NNT to  
45 prevent one incident TB case [correlation coefficient (CC) -0.75 (95% CI -1.00 to -0.44)] than between  
46 the NNT and WHO-estimated IR in the country of origin [CC -0.32 (95% CI -0.93 to 0.29)] for the top  
47 10 source countries for TB in Norway (using corrected NNTs and the 6-month definition of incident  
48 TB). The CCs were affected only modestly by emigration and definition of incident TB, and unaffected  
49 by the extreme value approach (data not shown). The WHO-estimated TB IRs in Somalia and Pakistan  
50 in 2013 were similar (274 and 270/100,000 person-years). These values contrast with our findings  
51 that NNTs were lowest for Somali immigrants and among the highest for Pakistani immigrants. The  
52 WHO-estimated TB IR in the Philippines is high, and the NNSs and NNTs were high in our setting.  
53 NNTs for immigrants from Pakistan and Thailand were similar, although the estimated TB IR is  
54 substantially lower in Thailand than in Pakistan. When eligibility for screening was based on TB IRs in  
55 countries of origin, NNTs were fairly similar for the different thresholds and highest for those with IRs  
56  
57  
58  
59  
60

1  
2  
3 > 200/100,000, including Eritrea and Afghanistan. Estimates were lowest for immigrants from the  
4 Horn of Africa.

5 Only a small percentage (range 3% - 21%) of LTBI-positive immigrants were estimated to  
6 have received LTBI treatment (table 4). The resulting estimated number of incident TB cases  
7 prevented by LTBI treatment was therefore modest, with a limited overall public-health impact of the  
8 immigrant LTBI screening programme in Norway in this period.

9  
10 Almost half (range 30%-58%) of LTBI treatments were prescribed >12 months after arrival in  
11 Norway (table 4). The highest percentages were for immigrants from the Horn of Africa, where most  
12 incident TB occurs. A substantial proportion of additional incident TB cases could have been  
13 prevented if the same number of LTBI treatments had been prescribed sooner after arrival (table 4).  
14  
15  
16  
17  
18  
19  
20  
21  
22  
23  
24  
25  
26  
27  
28  
29  
30  
31  
32  
33  
34  
35  
36  
37  
38  
39  
40  
41  
42  
43  
44  
45  
46  
47  
48  
49  
50  
51  
52  
53  
54  
55  
56  
57  
58  
59  
60

For peer review only

**Table 2** TB and LTBI among immigrants aged < 35 years arriving in Norway in 2008-2011 by country of origin. (Only top ten source countries for TB in Norway listed by country).

| Country of origin<br>(WHO estimated<br>annual TB incidence<br>rate per 100,000) <sup>a</sup> | Arrivals in<br>Norway in<br>2008-2011 <sup>b</sup><br>(<35 years)<br>(n) | Estimated<br>no. of<br>LTBI<br>cases <sup>c</sup><br>(n) | Notified TB in<br>Norway first 5<br>years after arrival<br>(<40 years)<br>(n) | NR         | Time in Norway prior to TB<br>diagnosis (months) |            |             |              | TB within<br>12 m<br>after<br>arrival<br>(%) | Person-years<br>under<br>observation <sup>d</sup><br>(n) | Observation<br>years lost<br>due to<br>emigration <sup>e</sup><br>(proportion) |
|----------------------------------------------------------------------------------------------|--------------------------------------------------------------------------|----------------------------------------------------------|-------------------------------------------------------------------------------|------------|--------------------------------------------------|------------|-------------|--------------|----------------------------------------------|----------------------------------------------------------|--------------------------------------------------------------------------------|
|                                                                                              |                                                                          |                                                          |                                                                               |            | < 1<br>(n)                                       | 1-6<br>(n) | 7-12<br>(n) | 13-60<br>(n) |                                              |                                                          |                                                                                |
| By country                                                                                   |                                                                          |                                                          |                                                                               |            |                                                  |            |             |              |                                              |                                                          |                                                                                |
| Myanmar (369)                                                                                | 900                                                                      | 255                                                      | 18                                                                            | 419        | 1                                                | 7          | 4           | 6            | 67                                           | 4300                                                     | 0.06                                                                           |
| Philippines (288)                                                                            | 6700                                                                     | 1909                                                     | 64                                                                            | 358        | 1                                                | 29         | 14          | 20           | 69                                           | 17,900                                                   | 0.47                                                                           |
| Somalia (274)                                                                                | 7400                                                                     | 2019                                                     | 252                                                                           | 900        | 23                                               | 74         | 54          | 101          | 60                                           | 28,000                                                   | 0.25                                                                           |
| Pakistan (270)                                                                               | 2000                                                                     | 520                                                      | 12                                                                            | 174        | 0                                                | 3          | 2           | 7            | 42                                           | 6900                                                     | 0.29                                                                           |
| Ethiopia (207)                                                                               | 2400                                                                     | 651                                                      | 46                                                                            | 667        | 5                                                | 8          | 9           | 24           | 48                                           | 6900                                                     | 0.42                                                                           |
| Afghanistan (189)                                                                            | 6800                                                                     | 1417                                                     | 44                                                                            | 238        | 4                                                | 10         | 7           | 23           | 48                                           | 18,500                                                   | 0.46                                                                           |
| Thailand (171)                                                                               | 3900                                                                     | 776                                                      | 20                                                                            | 120        | 1                                                | 6          | 2           | 11           | 45                                           | 16,600                                                   | 0.14                                                                           |
| India (167)                                                                                  | 2800                                                                     | 682                                                      | 18                                                                            | 167        | 1                                                | 3          | 2           | 12           | 28                                           | 10,800                                                   | 0.23                                                                           |
| Vietnam (140)                                                                                | 900                                                                      | 177                                                      | 12                                                                            | 364        | 0                                                | 9          | 1           | 2            | 83                                           | 3300                                                     | 0.25                                                                           |
| Eritrea (78)                                                                                 | 6900                                                                     | 1888                                                     | 82                                                                            | 307        | 10                                               | 21         | 15          | 36           | 56                                           | 26,700                                                   | 0.22                                                                           |
| <i>Horn of Africa</i> <sup>f</sup>                                                           | <i>16,700</i>                                                            | <i>4558</i>                                              | <i>380</i>                                                                    | <i>679</i> | <i>38</i>                                        | <i>103</i> | <i>78</i>   | <i>161</i>   | <i>58</i>                                    | <i>61,700</i>                                            | <i>0.26</i>                                                                    |
| Countries grouped by estimated TB incidence rate <sup>a</sup>                                |                                                                          |                                                          |                                                                               |            |                                                  |            |             |              |                                              |                                                          |                                                                                |
| >150/100,000                                                                                 | 37,100                                                                   | 7058                                                     | 533                                                                           | 446        | 43                                               | 161        | 104         | 225          | 58                                           | 119,400                                                  | 0.36                                                                           |
| >200/100,000                                                                                 | 23,300                                                                   | 5485                                                     | 428                                                                           | 595        | 35                                               | 137        | 87          | 169          | 61                                           | 72,000                                                   | 0.38                                                                           |
| >200/100,000 incl <sup>g</sup>                                                               | 37,000                                                                   | 8692                                                     | 554                                                                           | 473        | 49                                               | 167        | 110         | 228          | 59                                           | 117,200                                                  | 0.37                                                                           |

TB, tuberculosis; NR, notification rate per 100,000 person years under observation; LTBI, latent tuberculosis infection.

<sup>a</sup> From the 2014 World Health Organisation Global tuberculosis control report.<sup>6</sup>

<sup>b</sup> Number of immigrants, rounded to the nearest hundred. Data were obtained from Statistics Norway and the Norwegian Directorate of Immigration.

<sup>c</sup> Interferon-gamma release assay positivity was used as a proxy for LTBI (estimates are based on published data, including Norwegian data).

<sup>d</sup> Adjusted according to estimated time in Norway before emigration for immigrants arriving in Norway in 2008-2011.

<sup>e</sup> Estimated proportion observation years lost due to emigration within the first 5 years after arrival

<sup>f</sup> Including Somalia, Eritrea, and Ethiopia.

<sup>g</sup> Includes countries with TB IRs > 200/100,000 and Eritrea and Afghanistan (in line with current Norwegian guidelines)

**Table 3** Estimated numbers of preventable TB cases and the numbers of immigrants needed to screen (NNS) and to treat (NNT) for latent tuberculosis infection to prevent one case of tuberculosis in the first five years after arrival, among immigrants arriving in Norway 2008-2011.

| Country of origin<br>(WHO estimated<br>TB incidence rate<br>per 100,000) <sup>a</sup> | Incident TB based on diagnosis $\geq$ 1 month after arrival |                    |                           |                                  | Incident TB based on diagnosis $>$ 6 months after arrival |                    |                           |                                  |
|---------------------------------------------------------------------------------------|-------------------------------------------------------------|--------------------|---------------------------|----------------------------------|-----------------------------------------------------------|--------------------|---------------------------|----------------------------------|
|                                                                                       | Preventable<br>TB <sup>b,c</sup>                            | NNS <sup>c,d</sup> | NNT, crude <sup>c,e</sup> | NNT,<br>corrected <sup>c,f</sup> | Preventable<br>TB <sup>b,c</sup>                          | NNS <sup>c,d</sup> | NNT, crude <sup>c,e</sup> | NNT,<br>corrected <sup>c,f</sup> |
| By country                                                                            |                                                             |                    |                           |                                  |                                                           |                    |                           |                                  |
| Myanmar (369)                                                                         | 8 (12–6)                                                    | 111 (78–168)       | 30 (22–46)                | na*                              | 5 (7–3)                                                   | 181 (128–274)      | 50 (35–76)                | *na                              |
| Philippines (288)                                                                     | 31 (44–20)                                                  | 218 (154–330)      | 62 (44–94)                | 59 (42–89)                       | 16 (23–11)                                                | 419 (296–635)      | 119 (84–180)              | 104 (74–158)                     |
| Somalia (274)                                                                         | 113 (159–74)                                                | 66 (47–100)        | 18 (13–27)                | 13 (10–20)                       | 75 (107–50)                                               | 99 (70–150)        | 27 (19–41)                | 17 (12–26)                       |
| Pakistan (270)                                                                        | 6 (9–4)                                                     | 319 (225–484)      | 85 (60–129)               | 75 (53–113)                      | 4 (6–3)                                                   | 440 (311–668)      | 117 (83–178)              | 94 (67–143)                      |
| Ethiopia (207)                                                                        | 20 (29–13)                                                  | 118 (83–179)       | 32 (23–49)                | 23 (16–34)                       | 16 (22–10)                                                | 152 (108–231)      | 42 (29–63)                | 26 (19–40)                       |
| Afghanistan (189)                                                                     | 20 (28–13)                                                  | 347 (245–526)      | 72 (51–109)               | 46 (32–69)                       | 15 (22–10)                                                | 444 (313–673)      | 92 (65–140)               | 54 (38–82)                       |
| Thailand (171)                                                                        | 9 (13–6)                                                    | 414 (292–628)      | 83 (59–126)               | 78 (55–119)                      | 7 (9–4)                                                   | 585 (413–887)      | 117 (83–178)              | 111 (79–169)                     |
| India (167)                                                                           | 8 (12–6)                                                    | 334 (236–506)      | 82 (58–124)               | 75 (53–113)                      | 7 (10–5)                                                  | 396 (279–600)      | 97 (68–147)               | 89 (63–135)                      |
| Vietnam (140)                                                                         | 6 (8–4)                                                     | 151 (107–229)      | 30 (21–46)                | 28 (20–42)                       | 1 (2–1)                                                   | 605 (427–917)      | 120 (85–182)              | 93 (66–141)                      |
| Eritrea (78)                                                                          | 35 (50–23)                                                  | 194 (137–295)      | 53 (38–81)                | 43 (31–65)                       | 24 (34–16)                                                | 286 (202–433)      | 78 (55–119)               | 56 (40–85)                       |
| <i>Horn of Africa</i> <sup>g</sup>                                                    | 168 (238–111)                                               | 99 (70–151)        | 27 (19–41)                | 15 (11–23)                       | 115 (163–76)                                              | 145 (103–220)      | 40 (28–60)                | 18 (13–27)                       |
| Countries grouped by estimated TB incidence rate <sup>a</sup>                         |                                                             |                    |                           |                                  |                                                           |                    |                           |                                  |
| >150/100,000                                                                          | 241 (341–159)                                               | 154 (109–234)      | 32 (23–49)                | 23 (16–35)                       | 160 (226–105)                                             | 232 (164–352)      | 48 (34–73)                | 30 (21–45)                       |
| >200/100,000                                                                          | 193 (274–127)                                               | 121 (85–183)       | 28 (20–43)                | 20 (15–31)                       | 124 (175–82)                                              | 188 (133–286)      | 44 (31–67)                | 27 (19–41)                       |
| >200/100,00 incl <sup>h</sup>                                                         | 248 (351–164)                                               | 149 (105–226)      | 35 (25–53)                | 23 (16–34)                       | 163 (231–108)                                             | 227 (160–344)      | 53 (38–81)                | 29 (20–43)                       |

Estimates include TB occurring after 1 and 6 months and within the first 5 years following arrival in Norway, 2008-2011.

TB, tuberculosis; NNS and NNT, numbers needed to screen and treat to prevent one incident TB case within the first 5 years after arrival.

\*Emigration is minimal (na) since the majority arrived as refugees under the United Nations High Commissioner for Refugees and were granted residency prior to arrival

<sup>a</sup> From the 2014 World Health Organisation Global tuberculosis control report. <sup>6</sup>

<sup>b</sup> Number of TB patients notified from screening cohorts, adjusted regarding diagnostic test sensitivity, treatment efficacy, and adherence.

<sup>c</sup> Using the point estimate with (range) of sensitivity, efficacy, and adherence estimates.

<sup>d</sup> Ratio of the number of new arrivals to the number of preventable TB cases observed in Norway.

<sup>e</sup> Ratio of the number of latent tuberculosis infection and preventable TB cases observed in Norway, i.e. combined effect of emigration and risk of TB.

<sup>f</sup> 1 / risk of preventable TB for a person who stayed in Norway for 5 years, i.e. corrected for the effect of emigration.

<sup>g</sup> Including Somalia, Eritrea, and Ethiopia.

<sup>h</sup> Includes countries with TB IRs  $>$  200/100,000 and Eritrea and Afghanistan (in line with current Norwegian guidelines).

**Table 4** Estimated numbers of tuberculosis cases prevented by latent tuberculosis infection treatment of immigrants during the first 5 years after arrival in Norway, 2008-2011.

| Country of origin<br>(WHO estimated<br>TB incidence rate<br>per 100,000) <sup>a</sup> | TB<br>notificati<br>on (<40<br>years) | LTBI<br>treatment<br>(<40<br>years) <sup>b</sup> | Time of LTBI treatment<br>after arrival (months) |      |       | LTBI<br>treatment<br>> 12 m<br>after<br>arrival | Number of<br>incident TB cases<br>prevented by<br>LTBI treatment<br>(range) <sup>c</sup> | Additional preventable incident TB<br>cases if all LTBI treatments were<br>initiated within 6 or 12 months<br>after arrival |               |
|---------------------------------------------------------------------------------------|---------------------------------------|--------------------------------------------------|--------------------------------------------------|------|-------|-------------------------------------------------|------------------------------------------------------------------------------------------|-----------------------------------------------------------------------------------------------------------------------------|---------------|
|                                                                                       |                                       |                                                  | ≤6                                               | 7-12 | 13-60 |                                                 |                                                                                          | 6 months (%)                                                                                                                | 12 months (%) |
|                                                                                       | (n)                                   | (n, %)                                           | (n)                                              | (n)  | (n)   | (%)                                             | (n)                                                                                      |                                                                                                                             |               |
| <b>By country</b>                                                                     |                                       |                                                  |                                                  |      |       |                                                 |                                                                                          |                                                                                                                             |               |
| Myanmar (369)                                                                         | 18                                    | 54 (21)                                          | 23                                               | 15   | 16    | 30                                              | 3 (4–2)                                                                                  | 21                                                                                                                          | 9             |
| Philippines (288)                                                                     | 64                                    | 200 (10)                                         | 61                                               | 68   | 71    | 35                                              | 2 (3–1)                                                                                  | 57                                                                                                                          | 11            |
| Somalia (274)                                                                         | 252                                   | 391 (19)                                         | 64                                               | 113  | 215   | 55                                              | 19 (27–13)                                                                               | 38                                                                                                                          | 15            |
| Pakistan (270)                                                                        | 12                                    | 16 (3)                                           | 4                                                | 4    | 9     | 52                                              | 0.2 (0.2–0.1)                                                                            | 22                                                                                                                          | 7             |
| Ethiopia (207)                                                                        | 46                                    | 108 (17)                                         | 13                                               | 37   | 58    | 54                                              | 3 (5–2)                                                                                  | 15                                                                                                                          | 8             |
| Afghanistan (189)                                                                     | 44                                    | 159 (11)                                         | 32                                               | 54   | 74    | 46                                              | 3 (4–2)                                                                                  | 18                                                                                                                          | 7             |
| Thailand (171)                                                                        | 20                                    | 53 (7)                                           | 13                                               | 15   | 25    | 47                                              | 0.5 (0.7–0.3)                                                                            | 30                                                                                                                          | 4             |
| India (167)                                                                           | 18                                    | 21 (3)                                           | 6                                                | 8    | 7     | 33                                              | 0.2 (0.3–0.2)                                                                            | 10                                                                                                                          | 2             |
| Vietnam (140)                                                                         | 12                                    | 26 (15)                                          | 8                                                | 10   | 8     | 32                                              | 0.5 (0.6–0.3)                                                                            | 99                                                                                                                          | 4             |
| Eritrea (78)                                                                          | 82                                    | 195 (10)                                         | 21                                               | 60   | 113   | 58                                              | 3 (6–2)                                                                                  | 42                                                                                                                          | 16            |
| <i>Horn of Africa</i> <sup>d</sup>                                                    | 380                                   | 694 (15)                                         | 98                                               | 210  | 386   | 56                                              | 32 (45–21)                                                                               | 25                                                                                                                          | 12            |
| Countries grouped by estimated TB incidence rate <sup>a</sup>                         |                                       |                                                  |                                                  |      |       |                                                 |                                                                                          |                                                                                                                             |               |
| >150/100,000                                                                          | 533                                   | 1193 (17)                                        | 267                                              | 381  | 545   | 46                                              | 36 (51–24)                                                                               | 30                                                                                                                          | 10            |
| >200/100,000                                                                          | 428                                   | 900 (16)                                         | 198                                              | 288  | 414   | 46                                              | 30 (42–20)                                                                               | 34                                                                                                                          | 12            |
| >200/100,000 incl <sup>e</sup>                                                        | 554                                   | 1252 (14)                                        | 250                                              | 402  | 600   | 48                                              | 39 (55–26)                                                                               | 29                                                                                                                          | 11            |

TB, tuberculosis; LTBI, latent tuberculosis infection

<sup>a</sup> From the 2014 World Health Organisation Global tuberculosis control report.<sup>6</sup>

<sup>b</sup> Percentage of LTBI positive persons with LTBI treatment.

<sup>c</sup> Highest and lowest estimates using the point estimate with (range) of sensitivity, efficacy, and adherence estimates.

<sup>d</sup> Including Somalia, Eritrea, and Ethiopia.

<sup>e</sup> Includes countries with TB IRs > 200/100,000 and Eritrea and Afghanistan (in line with current Norwegian guidelines).

## DISCUSSION

The NNS and NNT to prevent one adverse outcome are measures used to communicate the effectiveness of health care interventions.<sup>18</sup> In this study of the immigrant LTBI screening programme in Norway, we found overall very high NNSs and NNTs to prevent one incident TB case, and higher than in previous studies.<sup>4,19</sup> Screening based on the TB NR in Norway rather than the TB IRs in source countries improved targeting of immigrants for LTBI management. However, NNSs and NNTs remained high for most countries by either approach, even when we applied the most optimistic estimates for test sensitivity, treatment effectiveness, and treatment adherence.

### Strengths and limitations

The strengths of this study include the availability of detailed country-specific administrative immigration and emigration data that provides a strong estimate of the person-time observation for recent immigrants, the high sensitivity of the TB and LTBI surveillance system, and the performance of comprehensive sensitivity analyses for the different estimates. Given the availability of information on time in Norway prior to TB diagnosis or LTBI treatment from MSIS, we were able to demonstrate the effect of intervention timing. This approach has important clinical implications. Lastly, the overall consistency with the UK study<sup>4</sup> makes comparison possible.

Study limitations include the currently weak monitoring and evaluation system of the Norwegian LTBI screening programme. Multiple service providers are involved in the screening process, with no harmonisation of data collection or follow-up documentation. Substantial delays in the provision of government-issued personal ID numbers to recent immigrants, specifically asylum seekers, have compromised follow-up and data linkage. For the same reason, we could not calculate NNTs based on absolute risk reduction in LTBI-treated individuals. The lack of denominator data is a common challenge in most countries, which renders immigrant screening programmes poorly evaluated. We have used comprehensive administrative data and high-coverage surveillance data including information on LTBI treatment, to overcome these limitations.

Screening coverage is high among asylum seekers and refugees, but less known for other immigrant groups (family reunification, students and immigrant workers). If screening participation was non-selective, it would not affect our estimates. However, if the prevalence of LTBI differed among those screened and not screened, our estimates may be biased.

The prevalence of LTBI in the arriving immigrant cohort was based on published literature, including Norwegian data on asylum seekers.<sup>8-10</sup> Whether these correctly reflects the prevalence of LTBI in the arriving cohort is unknown and this may potentially have biased our estimates in either direction. If the LTBI prevalence in the arriving immigrants was lower than estimated, the reported NNSs and NNTs would be too high, whereas with a higher prevalence than estimated our NNSs and NNTs would be too low.

Norwegian guidelines encourage treatment of individuals at greatest risk of progression to TB. If LTBI-positive individuals prescribed LTBI treatment were at greater risk than untreated LTBI-positive individuals, we may have underestimated the number of TB cases prevented by LTBI treatment during the study period. We may also have underestimated the overall benefit of the screening programme, as incident TB occurring >5 years after arrival was not included. However, whether incident TB occurring several years after arrival is related to initial infection or subsequent re-infection is difficult to evaluate in long-term follow-up studies. A Dutch study of molecular data in contacts showed that 83% of incident cases occurred within 5 years of the source case and >95% occurred within 10 years,<sup>20</sup> suggesting that the degree of potential underestimation was modest. Finally, the effects of screening for TB and LTBI are difficult to disentangle, as they contribute to each other.



### Comparison with other studies

A UK study documented substantial variation in NNSs and NNTs among immigrants from the 10 most commonly reported source countries for TB in the UK.<sup>4</sup> The figures contrasted with estimated TB IRs in the source countries. Similarly, we found great variation in NNSs and NNTs, which were not consistently related to estimated WHO TB IRs in source countries. Immigrants may originate from specific geographical areas with higher or lower rates than national averages, and their socio-economic circumstances before and after arrival in host countries may differ. Surprisingly, the estimated NNTs for source countries were overall considerably higher in Norway than in the UK. NNTs for immigrants from Pakistan were 85 (60-129) and 34 (17-70), from Somalia 18 (13-27) and 4 (1-7) and from India 82 (58-124) and 37 (20-61) in Norway and UK respectively.<sup>4</sup> In the current study, we differentiated between co-prevalent and incident TB and accounted for emigration; both factors have profound impacts on NNTs and were not assessed in the UK study.<sup>4</sup> Immigrants are screened soon after arrival in Norway, and many leave the country before the end of the 5-year observation period. In contrast, the UK study examined long-term immigrants. Differences in TB epidemiology may also contribute to the observed differences. The UK researchers reported higher TB rates, and therefore also higher transmission rates, than in most Western European countries, specifically in larger cities.<sup>21</sup> The higher estimates for treatment adherence in this study compared with the UK study would narrow, rather than widen, the difference in NNTs. A mathematical modelling study from Australia found that a combination of screening and subsequent treatment of all LTBI positive immigrants would result in an overall reduction in number of TB cases of about one-third to one-half from 2013 - 2050.<sup>19</sup> The NNSs were 297 for all immigrants and 136 for immigrants originating from countries with an estimated TB IR >100/100 000, which is somewhat lower than in the current study. As in the UK study the model was based on permanent arrivals.

### Challenges of NNS/NNT estimation in immigrant screening

The lifetime age-weighted risk of TB following infection in settings with low exogenous re-infection is estimated to be 12%.<sup>22</sup> The reported low pooled positive predictive value of the IGRA (2.7%) corresponds to an NNT of 37 across different settings and populations.<sup>23</sup> This corresponds to 111 months of treatment to prevent one TB case in need of 6 months of treatment. Thus, the risk reduction following LTBI treatment must be large to reduce the NNT. Although morbidity, mortality, and transmission can be avoided if TB is prevented, the benefit of LTBI treatment for the individual should outweigh the risk of severe adverse effects. Although LTBI treatment is safe overall, it carries a risk of severe and potentially life-threatening toxic adverse effects.<sup>24</sup>

Register data did not allow us to clearly distinguish co-prevalent TB from TB that developed later and was potentially preventable through LTBI management (incident TB). LTBI is considered to comprise a spectrum of infection states.<sup>25</sup> A prolonged asymptomatic phase of early subclinical TB may precede clinical presentation with active disease.<sup>26 27</sup> A pre- and post-arrival evaluation of a cohort of US immigrants reported that >80% of TB cases diagnosed within 1 year of receiving pre-arrival examination represented co-prevalent TB.<sup>27</sup> TB diagnosed <1 month after arrival is clearly not preventable, whereas TB diagnosis within 1-6 months may or may not be preventable. Based on this uncertainty, we presented NNSs and NNTs separately for TB diagnosed >1 and >6 months after arrival.

Emigration was substantial in some groups. Immigrants to Norway from Myanmar were almost exclusively refugees under the United Nations High Commissioner for Refugees and were granted residency prior to arrival, whereas applications from adult asylum seekers from Afghanistan commonly were rejected. The observation years lost due to emigration were also substantial in other groups with high proportions of asylum seekers. Immigrants from the Philippines often arrive as au-

1  
2  
3 pairs and are granted only 2-year work permits. Emigration may also lead to NNT overestimation if  
4 immigrants who show LTBI positivity on screening upon arrival in Norway develop TB after  
5 emigration.  
6  
7

### 8 **The effect of timeliness of screening and treatment**

9 In this study, less than one in five estimated LTBI-positive individuals (if all immigrants were  
10 screened) was treated. This gap in the *intention to screen is intention to treat* principle represents a  
11 challenge and has been reported in other Norwegian studies;<sup>28-30</sup> it has been due partly to Norwegian  
12 guidelines (in which the groups targeted for screening has been wider than those targeted for  
13 treatment), and measures have been taken to minimise it.<sup>7</sup> It may, however, also signal that the  
14 number of LTBI-positive individuals is too high for the health services to treat, and/or that clinicians  
15 are reluctant to initiate LTBI treatment in individuals with unknown risk of progression to disease.  
16

17 As a high proportion of incident TB cases occur early after arrival, an important component  
18 to improve the impact of the screening programme would be to ensure expedited follow-up and LTBI  
19 treatment initiation. Increased attention is given to the need for timely interventions as the  
20 incubation period for TB.<sup>31</sup> The reduced risk of progression to TB over time will increase NNT  
21 estimates with time, and delayed follow-up represents missed opportunities. The potential for  
22 additional prevented cases varied across countries of origin. The high potential for additional  
23 prevention among immigrants from Vietnam reflects the high proportions of those who are ill early  
24 after arrival and those for whom LTBI treatment is initiated late, whereas the opposite was observed  
25 for India.  
26  
27  
28  
29

### 30 **Comparing NNT to TB NR in Norway and WHO estimated IRs in countries of origin**

31 We found a stronger numerical correlation between the NNT and TB NR in Norway than between the  
32 NNT and WHO-estimated IR in the country of origin for the top 10 source countries for TB in Norway.  
33 This is expected, as both the NRs and the NNT estimates are derived from the same Norwegian data  
34 (representing the same subset of the population who immigrated to Norway, which may not be a  
35 representative sample of the people in the country of origin), whereas the WHO-estimated IRs use  
36 country-specific data to make representative estimates for their national populations. When a large  
37 difference exists between the people in the country of origin and the subset of the population who  
38 immigrated to Norway, we would expect the TB NR in Norway to be more programmatically useful  
39 than the WHO estimated IRs in countries of origin.  
40  
41  
42

### 43 **Public health implications**

44 The overall high NNTs and NNTs in this study call into question whether routine LTBI screening of  
45 immigrants in a high-income low-incidence country is feasible, safe and effective, without the  
46 application of additional selection criteria. Although LTBI management based on TB notification in  
47 Norway rather than WHO estimated IRs in countries of origin, would have improved the targeting of  
48 immigrants, the NNTs and NNTs remained high.  
49

50 The estimated number of incident TB cases prevented by LTBI treatment was modest  
51 suggesting that substantial scale-up of the LTBI care cascade is necessary to strengthen the public  
52 health impact. Until new tests with higher predictive values for TB are available,<sup>25</sup> there are two  
53 complementary approaches to reduce the NNTs and NNTs. Firstly, screening could be limited to  
54 immigrants with additional risk factors for disease, such as young age, recent known contact,  
55 abnormal x-ray findings, and immunosuppressive conditions. This approach, however, will require  
56 additional resources to correctly identify risk groups on entry. Secondly, the LTBI care cascade could  
57 be improved so that further examinations and treatment are offered sooner following a positive LTBI  
58 screening test. The programme has the potential to prevent additional TB cases if more immigrants  
59  
60

1  
2  
3 with LTBI are offered treatment, and this treatment starts sooner after arrival. TB disease develops  
4 usually 3-9 months after exposure and rarely more than two years after exposure,<sup>31</sup> which  
5 strengthens the recommendation for prompt follow-up of immigrant screening. A combination of  
6 these two approaches seems most plausible. Cost-effectiveness studies could help to identify the  
7 most beneficial approach in a Norwegian setting.  
8

9 Monitoring of the effectiveness of screening should urgently be improved, by targeting  
10 immigrants with risk factors in addition to the TB IR in the source country and ensuring timely follow-  
11 up of screening. The data in Norway are better than in many other countries, but still with wide  
12 uncertainty. As immigration trends and composition and health services vary considerably among  
13 countries, better monitoring and evaluation of current screening programmes are needed so that  
14 countries can adjust their policies based on the yield of screening.  
15

16 Even when applying the most optimistic estimates regarding diagnostic test sensitivity,  
17 treatment efficacy, and adherence to treatment, a substantial proportion of incident TB cases will  
18 not be prevented through LTBI screening and management. Easy and equitable access to health care  
19 services for all should remain a cornerstone of tuberculosis control and prevention so that clinical  
20 cases are detected and treated early.  
21  
22

### 23 **Ethical approval**

24 Ethical approval of the study was obtained from Regional Committee for Medical and Health  
25 Research Ethics, south east Norway (2017/164).  
26  
27

### 28 **Funding statement**

29 The Norwegian Health Association funded this study. Brita Askeland Winje was funded by the  
30 Norwegian Health Association  
31  
32

### 33 **Competing interests statement**

34 None declared.  
35  
36

### 37 **Authors' contributions**

38 BAW initiated the study, and BAW and EH wrote the protocol. BAW, RW, and GMG were responsible  
39 for modelling and analyses; BAW, RW and EH drafted the manuscript; and BAW, PA, PAA, EH, RW,  
40 and GMG provided input to discussions. All authors have read and approved the final version of the  
41 manuscript.  
42  
43

### 44 **Data sharing statement**

45 Study data are available from the corresponding author on reasonable request  
46  
47  
48  
49  
50  
51  
52  
53  
54  
55  
56  
57  
58  
59  
60

1  
2  
3 **Figure legends**  
4

5 **Figure 1** Reasons for immigration for immigrants aged < 35 years arriving in Norway in 2008-2011, by  
6 country of origin (%).  
7  
8  
9  
10  
11  
12  
13  
14  
15  
16  
17  
18  
19  
20  
21  
22  
23  
24  
25  
26  
27  
28  
29  
30  
31  
32  
33  
34  
35  
36  
37  
38  
39  
40  
41  
42  
43  
44  
45  
46  
47  
48  
49  
50  
51  
52  
53  
54  
55  
56  
57  
58  
59  
60

For peer review only

## REFERENCES

1. WHO. Guidelines for the management of latent tuberculosis infection Geneva 2014 [cited 2014 28.10.2014]. Available from: [http://www.who.int/tb/publications/lbti\\_document\\_page/en/](http://www.who.int/tb/publications/lbti_document_page/en/).
2. WHO. Latent TB Infection: Updated and consolidated guidelines for programmatic management. 2018;WHO/CDS/TB/2018.4:74. doi: <http://www.who.int/tb/publications/2018/latent-tuberculosis-infection/en/>
3. Kunst H, Burman M, Arnesen TM, et al. Tuberculosis and latent tuberculosis infection screening of migrants in Europe: comparative analysis of policies, surveillance systems and results. *The international journal of tuberculosis and lung disease : the official journal of the International Union against Tuberculosis and Lung Disease* 2017;21(8):840-51. doi: 10.5588/ijtld.17.0036
4. Kruijshaar ME, Abubakar I, Stagg HR, et al. Migration and tuberculosis in the UK: targeting screening for latent infection to those at greatest risk of disease. *Thorax* 2013;68(12):1172-4. doi: 10.1136/thoraxjnl-2013-203254
5. Arnesen TM, Heldal E, Mengshoel AT, et al. Tuberkulose i Norge i 2016 med behandlingsresultater for 2015. In: Folkehelseinstituttet, ed. Oslo, 2017.
6. WHO. Global tuberculosis report. Geneva, Switzerland 2014.
7. Folkehelseinstituttet. Guidelines for prevention and control of tuberculosis Oslo: Norwegian Institute of Public Health; 2016 [Available from: <https://www.fhi.no/nettpub/tuberkuloseveilederen/> accessed 23.06.2017.
8. Winje BA, Oftung F, Korsvold GE, et al. Screening for tuberculosis infection among newly arrived asylum seekers: comparison of QuantiFERONTB Gold with tuberculin skin test. *BMC Infect Dis* 2008;8:65. doi: 1471-2334-8-65 [pii];10.1186/1471-2334-8-65 [doi]
9. Pareek M, Bond M, Shorey J, et al. Community-based evaluation of immigrant tuberculosis screening using interferon gamma release assays and tuberculin skin testing: observational study and economic analysis. *Thorax* 2013;68(3):230-9. doi: 10.1136/thoraxjnl-2011-201542
10. Pareek M, Watson JP, Ormerod LP, et al. Screening of immigrants in the UK for imported latent tuberculosis: a multicentre cohort study and cost-effectiveness analysis. *The Lancet infectious diseases* 2011;11(6):435-44. doi: 10.1016/S1473-3099(11)70069-X
11. Pai M, Denkinger CM, Kik SV, et al. Gamma interferon release assays for detection of Mycobacterium tuberculosis infection. *Clin Microbiol Rev* 2014;27(1):3-20. doi: 10.1128/CMR.00034-13
12. Diel R, Loddenkemper R, Nienhaus A. Evidence-based comparison of commercial interferon-gamma release assays for detecting active TB: a metaanalysis. *Chest* 2010;137(4):952-68. doi: 10.1378/chest.09-2350
13. Stagg HR, Zenner D, Harris RJ, et al. Treatment of Latent Tuberculosis Infection: A Network Meta-analysis. *Ann Intern Med* 2014 doi: 10.7326/M14-1019
14. Erkens CG, Slump E, Verhagen M, et al. Monitoring latent tuberculosis infection diagnosis and management in the Netherlands. *Eur Respir J* 2016;47(5):1492-501. doi: 10.1183/13993003.01397-2015
15. Kan B, Kalin M, Bruchfeld J. Completing treatment for latent tuberculosis: patient background matters. *The international journal of tuberculosis and lung disease : the official journal of the International Union against Tuberculosis and Lung Disease* 2013;17(5):597-602. doi: 10.5588/ijtld.12.0692
16. Olsen AIM, Andersen HE, Amus J, et al. Management of latent tuberculosis infection in Norway in 2009: a descriptive cross-sectional study. *Public Health Action* 2013;3(2) [published Online First: 21/06/2013]
17. Schein YL, Madebo T, Andersen HE, et al. Treatment Completion for Latent Tuberculosis Infection in Norway: A Prospective Cohort Study *BMC infectious diseases* 2018; Accepted for publication, INFD-D-18-00176R3 (30.10.2018)

18. Laupacis A, Sackett DL, Roberts RS. An assessment of clinically useful measures of the consequences of treatment. *N Engl J Med* 1988;318(26):1728-33. doi: 10.1056/NEJM198806303182605
19. Denholm JT, McBryde ES. Can Australia eliminate TB? Modelling immigration strategies for reaching MDG targets in a low-transmission setting. *Aust N Z J Public Health* 2014;38(1):78-82. doi: 10.1111/1753-6405.12161
20. Borgdorff MW, Sebek M, Gesskus RB, et al. The incubation period distribution of tuberculosis estimated with a molecular epidemiological approach. *Int J Epidemiol* 2011;40(4):964-70. doi: 10.1093/ije/dyr058
21. Kirby T. Tuberculosis rates unacceptably high in UK cities. *The Lancet infectious diseases* 2013;13(10):836-7.
22. Vynnycky E, Fine PE. The natural history of tuberculosis: the implications of age-dependent risks of disease and the role of reinfection. *Epidemiol Infect* 1997;119(2):183-201.
23. Diel R, Loddenkemper R, Nienhaus A. Predictive value of interferon-gamma release assays and tuberculin skin testing for progression from latent TB infection to disease state: a meta-analysis. *Chest* 2012;142(1):63-75. doi: chest.11-3157 [pii];10.1378/chest.11-3157 [doi]
24. Kunst H, Khan KS. Age-related risk of hepatotoxicity in the treatment of latent tuberculosis infection: a systematic review. *International Journal of Tuberculosis & Lung Disease* 2010;14(11):1374-81.
25. Esmail H, Barry CE, 3rd, Young DB, et al. The ongoing challenge of latent tuberculosis. *Philos Trans R Soc Lond B Biol Sci* 2014;369(1645):20130437. doi: 10.1098/rstb.2013.0437
26. Dheda K, Barry CE, 3rd, Maartens G. Tuberculosis. *Lancet* 2016;387(10024):1211-26. doi: 10.1016/S0140-6736(15)00151-8
27. Walter ND, Painter J, Parker M, et al. Persistent latent tuberculosis reactivation risk in United States immigrants. *American journal of respiratory and critical care medicine* 2014;189(1):88-95. doi: 10.1164/rccm.201308-1480OC
28. Harstad I, Jacobsen GW. Poor follow-up after screening for tuberculosis. *TidsskrNor Laegeforen* 2012;132(1):14-16. doi: 2189304 [pii];10.4045/tidsskr.11.0566 [doi]
29. Harstad I, Jacobsen GW, Heldal E, et al. The role of entry screening in case finding of tuberculosis among asylum seekers in Norway. *BMCPublic Health* 2010;10:670. doi: 1471-2458-10-670 [pii];10.1186/1471-2458-10-670 [doi]
30. Winje BA, White R, Syre H, et al. Stratification by interferon-gamma release assay level predicts risk of incident TB. *Thorax* 2018 doi: 10.1136/thoraxjnl-2017-211147
31. Behr MA, Edelstein PH, Ramakrishnan L. Revisiting the timetable of tuberculosis. *BMJ* 2018;362:k2738. doi: 10.1136/bmj.k2738



Figure 1 Reasons for immigration for immigrants aged < 35 years arriving in Norway in 2008-2011, by country of origin (%).

## Appendices 1a-d and 2

### Appendix 1a, Data sources and information provided

| Source                                                                         | Information provided                                                                                                                                                                                                                                                                                                                                                                                                                                                                                                                                                                                                                                                                                                                     |
|--------------------------------------------------------------------------------|------------------------------------------------------------------------------------------------------------------------------------------------------------------------------------------------------------------------------------------------------------------------------------------------------------------------------------------------------------------------------------------------------------------------------------------------------------------------------------------------------------------------------------------------------------------------------------------------------------------------------------------------------------------------------------------------------------------------------------------|
| <b>IMMIGRATION AND EMIGRATION DATA</b>                                         |                                                                                                                                                                                                                                                                                                                                                                                                                                                                                                                                                                                                                                                                                                                                          |
| Norwegian Directorate of Immigration (UDI) (aggregated data)                   | <b>Immigration:</b> Total number of asylum seekers applying for residence in Norway by country of citizenship and by year of application (2008-2014). Age-distribution was reported as proportions by country of citizenship<br><b>Emigration:</b> Data on the number of immigrants who later emigrated. Time before emigration were based on the number of days from date of application to date of final rejection of application by country of citizenship and by year. Data were obtained as percentiles, i.e. the number of days reported as the 10 <sup>th</sup> percentile reflected the number of days from date of application until date of final rejection for the ten percent with the shortest observation time, and so on. |
| Statistics Norway (SSB) (aggregated data)                                      | <b>Immigration:</b> Total number of given residence permits for students, work immigrants, au-pairs and family reunifications in Norway by country of birth and year (2008-2014). Age-distribution was reported by country of birth and reason for immigration (proportions)<br><b>Emigration:</b> Information on average time in Norway before emigration by reason for immigration and year. Estimates are based on data from 2014.                                                                                                                                                                                                                                                                                                    |
| <b>CASE DATA</b>                                                               |                                                                                                                                                                                                                                                                                                                                                                                                                                                                                                                                                                                                                                                                                                                                          |
| Norwegian Surveillance System for Infectious diseases (MSIS) (case-based data) | Persons notified with TB or preventive treatment of latent TB in Norway, 2008 – 2016: individual-level data including category (TB or LTBI preventive treatment), age, country of birth, date of notification, date of diagnosis (collection of clinical sample), date of start of treatment and time in Norway prior to date of diagnosis (categorized as <1 month, 1-6 months, 7-12 months, 1-2 years, 3-4 years, 5-9 years, and >10 years)                                                                                                                                                                                                                                                                                            |

### Appendix 1b, Definitions

| Definitions                                                            | Estimates                                                                                                                                                                                                                                                                                                                                                                                                                                               |
|------------------------------------------------------------------------|---------------------------------------------------------------------------------------------------------------------------------------------------------------------------------------------------------------------------------------------------------------------------------------------------------------------------------------------------------------------------------------------------------------------------------------------------------|
| Immigration and emigration                                             | We defined an immigrant as a person who applied for asylum or who received a residence permit (other immigrant groups). We defined emigration as having received a final rejection of application for asylum or being recorded as emigrated in SSB.                                                                                                                                                                                                     |
| Country of origin                                                      | This reflects citizenship for asylum seekers and country of birth for other immigrant groups.                                                                                                                                                                                                                                                                                                                                                           |
| Number immigrants arriving in 2008-2011 and who eligible for screening | We estimated the proportion aged <15 years and 15-35 years by country, reason for immigration and year of immigration based on the reported age-distribution from SSB/UDI. Refugees: 83% < 35 yrs. Among them 18% are 0-14 yrs and 82% 15-34 yrs<br>Family-reunification: 80% < 35 yrs, among them 44% are 0-14 yrs and 56% are 15-34 yrs. Work immigrants: 70%, among them all are 15-34 yrs. Students and au-pairs: 95%, among them all are 15-34 yrs |



1  
2  
3  
4  
5  
6  
7  
8  
9  
10  
11  
12  
13  
14  
15  
16  
17  
18  
19  
20  
21  
22  
23  
24  
25  
26  
27  
28  
29  
30  
31  
32  
33  
34  
35  
36  
37  
38  
39  
40  
41  
42  
43  
44  
45  
46

|                       |                                                                                                                                                                                                                                                                                                                                                                                                                                                                                                                                                                                                                                                   |
|-----------------------|---------------------------------------------------------------------------------------------------------------------------------------------------------------------------------------------------------------------------------------------------------------------------------------------------------------------------------------------------------------------------------------------------------------------------------------------------------------------------------------------------------------------------------------------------------------------------------------------------------------------------------------------------|
| LTBI                  | Latent tuberculosis infection. We used positive IGRA as a proxy for LTBI.                                                                                                                                                                                                                                                                                                                                                                                                                                                                                                                                                                         |
| Number of LTBI        | The prevalence of LTBI in the immigrant cohort was estimated by multiplying the number of arriving immigrants with the published estimates of IGRA positives, based on published literature, including a Norwegian publication. Estimates of IGRA positivity ranged from 18%-29%, depending on estimated TB incidence rate in country of origin and age-group; 0-14 yrs and 15-35yrs.                                                                                                                                                                                                                                                             |
| TB and LTBI treatment | We used the categorical information about time in Norway prior to diagnosis from MSIS to estimate a probability distribution for each case's arrival year in Norway. We then estimated the number of individuals with TB or LTBI treatment who belonged to the 2008-2011 cohort of immigrants by multiplying the number of cases by the probability that they immigrated to Norway in 2008-2011.                                                                                                                                                                                                                                                  |
| Preventable TB        | We defined preventable TB as a TB patient notified to MSIS with TB and who: (i) arrived to Norway in 2008-2011, (ii) was notified to MSIS > 1 month (6 months) and < 5 years after arrival, (iii) was younger than 40 years of age at notification (to allow for five years observation time after screening). We excluded TB cases that were on TB treatment on arrival to Norway. We then used this number and adjusted for QFT sensitivity 84% (81% -87%), treatment effectiveness at 65% (50%-80), and treatment completion rates at 90% (80% - 100%) to estimate the final number of preventable TB cases belonging to the 2008-2011 cohort. |

**Appendix 1c, Model assumptions**

|                                                                                                                                                                      |
|----------------------------------------------------------------------------------------------------------------------------------------------------------------------|
| That immigrants who received residence permit or applied for asylum actually immigrated to Norway.                                                                   |
| That immigrants that later were registered as emigrated, or had a final rejection of application for asylum, actually emigrated.                                     |
| That all immigrants eligible for screening were screened and that they were screened soon after arrival in line with regulations.                                    |
| That the age- and country specific prevalence of LTBI from published literature, including Norwegian data, is a fair proxy for the prevalence in the arrival cohort. |
| That a person did not leave Norway after receiving LTBI treatment.                                                                                                   |

**Appendix d, Indexes**

| Index                                                                  | Calculation                                                                                                                                      | The use of the indexes                                                               |
|------------------------------------------------------------------------|--------------------------------------------------------------------------------------------------------------------------------------------------|--------------------------------------------------------------------------------------|
| Duration of time spent in Norway (cumulative probability distribution) | Table Y1                                                                                                                                         | To estimate the number of people remaining in Norway in year X who arrived in year Y |
| Estimated people remaining in Norway in year X who arrived in year Y   | Number of arriving immigrants in year Y * proportion of immigrants who remain in Norway for at least (X-Y) years                                 | To calculate person years under observation for the cohort                           |
| Person years under observation for the cohort                          | Estimated number of years spent in Norway for immigrants who arrived in years 2008-2011                                                          | Used as the exposure time for the cohort                                             |
| Risk of preventable TB per time-period                                 | For each time period after arrival to Norway (<1 month, 1-6 months, 7-12 months, 1-2 years, 3-4 years, 5-9 years, and >10 years) we obtained the | Used to calculate the additional preventable TB (see description below)              |

|                                                   |                                                                                                                                                                                                                                                                                                                                    |                                                                                                 |
|---------------------------------------------------|------------------------------------------------------------------------------------------------------------------------------------------------------------------------------------------------------------------------------------------------------------------------------------------------------------------------------------|-------------------------------------------------------------------------------------------------|
|                                                   | number of preventable TB cases and then calculated the risk of preventable TB per time period (i.e. number of cases divided by number of people).                                                                                                                                                                                  |                                                                                                 |
| Monthly risk of preventable TB within time-period | $1-(1-\text{risk})^{(1/\text{numbermonths})}$ .                                                                                                                                                                                                                                                                                    | Used to calculate the 5 year risk of preventable TB without emigration                          |
| Number needed to screen (NNS)                     | Number of arriving immigrants/number of preventable TB                                                                                                                                                                                                                                                                             | Primary outcome                                                                                 |
| Crude number needed to treat (NNT)                | Number of LTBI positive immigrants/number of preventable TB (a combined effect of emigration and TB risk)                                                                                                                                                                                                                          | Primary outcome for immigrants without taking emigration into account.                          |
| Corrected number needed to treat (NNT)            | 1/risk of preventable TB (TB risk corrected for the effect of emigration)                                                                                                                                                                                                                                                          | NNT measure that is independent of emigration                                                   |
| Number of TB prevented by LTBI treatment          | Number of LTBI treated*risk of preventable TB in the different time periods based on the first five years in Norway.<br><br>Calculations for time periods were based on LTBI positive individuals who remained at risk 1-6 months, 7-12 months, 13-36 months and 37-60 months after arrival to Norway.                             | Secondary outcome to estimate the number of TB prevented in Norway from the screening programme |
| Additional preventable TB                         | We calculated the percentage increase in prevented TB (potential for additional prevention) when LTBI treatment was initiated within the first (i) 6 months and (ii) 12 months after arrival to Norway (based on the 84% sensitivity/65% treatment effectiveness/90% adherence estimates and incident TB > 1 month after arrival). | Secondary outcome to estimate the effect of delay of LTBI treatment initiation                  |

1  
2  
3  
4  
5  
6  
7  
8  
9  
10  
11  
12  
13  
14  
15  
16  
17  
18  
19  
20  
21  
22  
23  
24  
25  
26  
27  
28  
29  
30  
31  
32  
33  
34  
35  
36  
37  
38  
39  
40  
41  
42  
43  
44  
45  
46

**Appendix 2. Number of notified TB cases from the top ten source countries for immigrant TB in Norway, 2008-2015 (Source: MSIS\*)**

| Countries   | 2008 | 2009 | 2010 | 2011 | 2012 | 2013 | 2014 | 2015 | Total |
|-------------|------|------|------|------|------|------|------|------|-------|
| Somalia     | 70   | 106  | 72   | 106  | 112  | 102  | 84   | 47   | 699   |
| Eritrea     | 12   | 24   | 16   | 20   | 23   | 41   | 47   | 49   | 232   |
| Philippines | 20   | 14   | 25   | 23   | 30   | 25   | 26   | 25   | 188   |
| Pakistan    | 20   | 18   | 23   | 20   | 15   | 18   | 15   | 8    | 137   |
| Ethiopia    | 9    | 27   | 17   | 14   | 15   | 16   | 17   | 15   | 130   |
| Afghanistan | 7    | 10   | 19   | 16   | 11   | 18   | 11   | 26   | 118   |
| Thailand    | 10   | 16   | 15   | 10   | 11   | 8    | 14   | 13   | 97    |
| Vietnam     | 10   | 15   | 12   | 11   | 7    | 15   | 12   | 7    | 89    |
| India       | 7    | 9    | 7    | 4    | 11   | 12   | 9    | 6    | 65    |
| Myanmar     | 11   | 6    | 10   | 8    | 7    | 7    | 3    | 2    | 54    |

\*MSIS, Norwegian Surveillance System for Infectious Diseases

STROBE Statement—Checklist of items that should be included in reports of *cohort studies*

|                              | Item No | Recommendation                                                                                                                                                                                                                                                                                                                                                                                                                                      |
|------------------------------|---------|-----------------------------------------------------------------------------------------------------------------------------------------------------------------------------------------------------------------------------------------------------------------------------------------------------------------------------------------------------------------------------------------------------------------------------------------------------|
| <b>Title and abstract</b>    | 1       | (a) Indicate the study's design with a commonly used term in the title or the abstract, <a href="#">page 1 title</a><br>(b) Provide in the abstract an informative and balanced summary of what was done and what was found, <a href="#">page 2</a>                                                                                                                                                                                                 |
| <b>Introduction</b>          |         |                                                                                                                                                                                                                                                                                                                                                                                                                                                     |
| Background/rationale         | 2       | Explain the scientific background and rationale for the investigation being reported, <a href="#">page 4</a>                                                                                                                                                                                                                                                                                                                                        |
| Objectives                   | 3       | State specific objectives, including any prespecified hypotheses, <a href="#">page 4</a>                                                                                                                                                                                                                                                                                                                                                            |
| <b>Methods</b>               |         |                                                                                                                                                                                                                                                                                                                                                                                                                                                     |
| Study design                 | 4       | Present key elements of study design early in the paper <a href="#">page 4</a>                                                                                                                                                                                                                                                                                                                                                                      |
| Setting                      | 5       | Describe the setting, locations, and relevant dates, including periods of recruitment, exposure, follow-up, and data collection , <a href="#">page 4 and 5</a>                                                                                                                                                                                                                                                                                      |
| Participants                 | 6       | (a) Give the eligibility criteria, and the sources and methods of selection of participants. Describe methods of follow-up <a href="#">page 4 and 5</a><br>(b) For matched studies, give matching criteria and number of exposed and unexposed <a href="#">na</a>                                                                                                                                                                                   |
| Variables                    | 7       | Clearly define all outcomes, exposures, predictors, potential confounders, and effect modifiers. Give diagnostic criteria, if applicable <a href="#">page 5-8, appendices 1a-d</a>                                                                                                                                                                                                                                                                  |
| Data sources/<br>measurement | 8*      | For each variable of interest, give sources of data and details of methods of assessment (measurement). Describe comparability of assessment methods if there is more than one group <a href="#">page 4 and 5, appendix 1a</a>                                                                                                                                                                                                                      |
| Bias                         | 9       | Describe any efforts to address potential sources of bias, <a href="#">page 6 and 7</a>                                                                                                                                                                                                                                                                                                                                                             |
| Study size                   | 10      | Explain how the study size was arrived at <a href="#">page 5</a>                                                                                                                                                                                                                                                                                                                                                                                    |
| Quantitative variables       | 11      | Explain how quantitative variables were handled in the analyses. If applicable, describe which groupings were chosen and why <a href="#">page 5-7</a>                                                                                                                                                                                                                                                                                               |
| Statistical methods          | 12      | (a) Describe all statistical methods, including those used to control for confounding <a href="#">page 5-7</a><br>(b) Describe any methods used to examine subgroups and interactions <a href="#">page 5-7</a><br>(c) Explain how missing data were addressed <a href="#">page 6</a><br>(d) If applicable, explain how loss to follow-up was addressed <a href="#">page 6</a><br>(e) Describe any sensitivity analyses <a href="#">page 6 and 7</a> |
| <b>Results</b>               |         |                                                                                                                                                                                                                                                                                                                                                                                                                                                     |
| Participants                 | 13*     | (a) Report numbers of individuals at each stage of study—eg numbers potentially eligible, examined for eligibility, confirmed eligible, included in the study, completing follow-up, and analysed <a href="#">page 6 and 7</a><br>(b) Give reasons for non-participation at each stage <a href="#">page 6</a><br>(c) Consider use of a flow diagram                                                                                                 |
| Descriptive data             | 14*     | (a) Give characteristics of study participants (eg demographic, clinical, social) and information on exposures and potential confounders <a href="#">table 2, page 10</a><br>(b) Indicate number of participants with missing data for each variable of interest, <a href="#">na (model)</a><br>(c) Summarise follow-up time (eg, average and total amount) <a href="#">table 2, page 10</a>                                                        |
| Outcome data                 | 15*     | Report numbers of outcome events or summary measures over time <a href="#">table 3 and 4, page 11 and 12</a>                                                                                                                                                                                                                                                                                                                                        |
| Main results                 | 16      | (a) Give unadjusted estimates and, if applicable, confounder-adjusted estimates and                                                                                                                                                                                                                                                                                                                                                                 |

|                          |    |                                                                                                                                                                                                           |
|--------------------------|----|-----------------------------------------------------------------------------------------------------------------------------------------------------------------------------------------------------------|
|                          |    | their precision (eg, 95% confidence interval). Make clear which confounders were adjusted for and why they were included <a href="#">table 3, page 11</a>                                                 |
|                          |    | (b) Report category boundaries when continuous variables were categorized <a href="#">na</a>                                                                                                              |
|                          |    | (c) If relevant, consider translating estimates of relative risk into absolute risk for a meaningful time period <a href="#">na</a>                                                                       |
| Other analyses           | 17 | Report other analyses done—eg analyses of subgroups and interactions, and sensitivity analyses <a href="#">table 4, page 12</a>                                                                           |
| <b>Discussion</b>        |    |                                                                                                                                                                                                           |
| Key results              | 18 | Summarise key results with reference to study objectives <a href="#">page 13</a>                                                                                                                          |
| Limitations              | 19 | Discuss limitations of the study, taking into account sources of potential bias or imprecision. Discuss both direction and magnitude of any potential bias <a href="#">page 13</a>                        |
| Interpretation           | 20 | Give a cautious overall interpretation of results considering objectives, limitations, multiplicity of analyses, results from similar studies, and other relevant evidence <a href="#">page 15 and 16</a> |
| Generalisability         | 21 | Discuss the generalisability (external validity) of the study results <a href="#">page 16</a>                                                                                                             |
| <b>Other information</b> |    |                                                                                                                                                                                                           |
| Funding                  | 22 | Give the source of funding and the role of the funders for the present study and, if applicable, for the original study on which the present article is based <a href="#">page 16</a>                     |

\*Give information separately for exposed and unexposed groups.

**Note:** An Explanation and Elaboration article discusses each checklist item and gives methodological background and published examples of transparent reporting. The STROBE checklist is best used in conjunction with this article (freely available on the Web sites of PLoS Medicine at <http://www.plosmedicine.org/>, Annals of Internal Medicine at <http://www.annals.org/>, and Epidemiology at <http://www.epidem.com/>). Information on the STROBE Initiative is available at <http://www.strobe-statement.org>.
